# Supplementary material for: Barcoding Nemo: DNA-Based Identifications for the Ornamental Fish Trade
Source: PubMed Central journal article supplement (PMC2708913; doi:10.1371/journal.pone.0006300), 2009-07-21

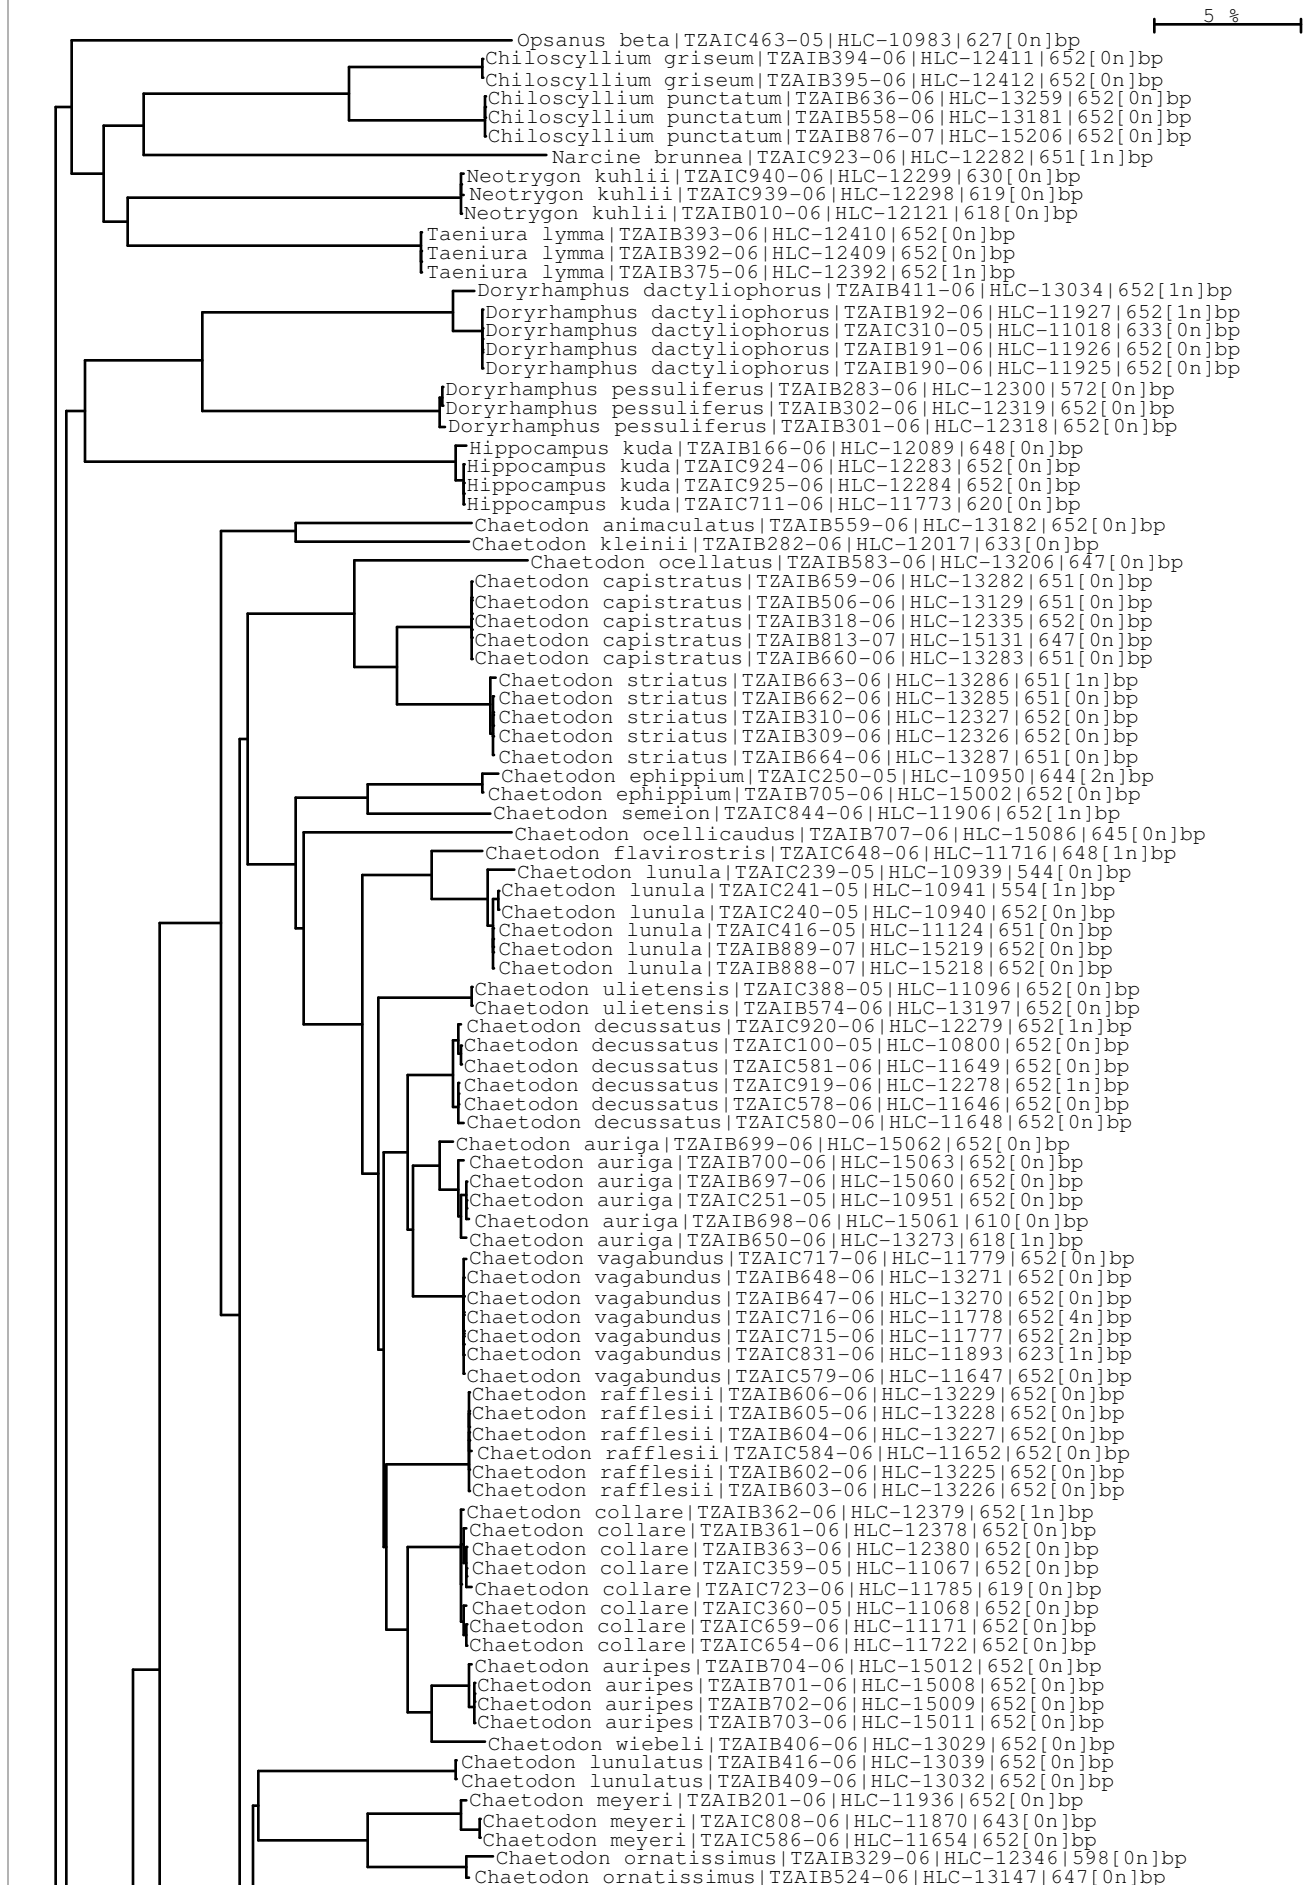

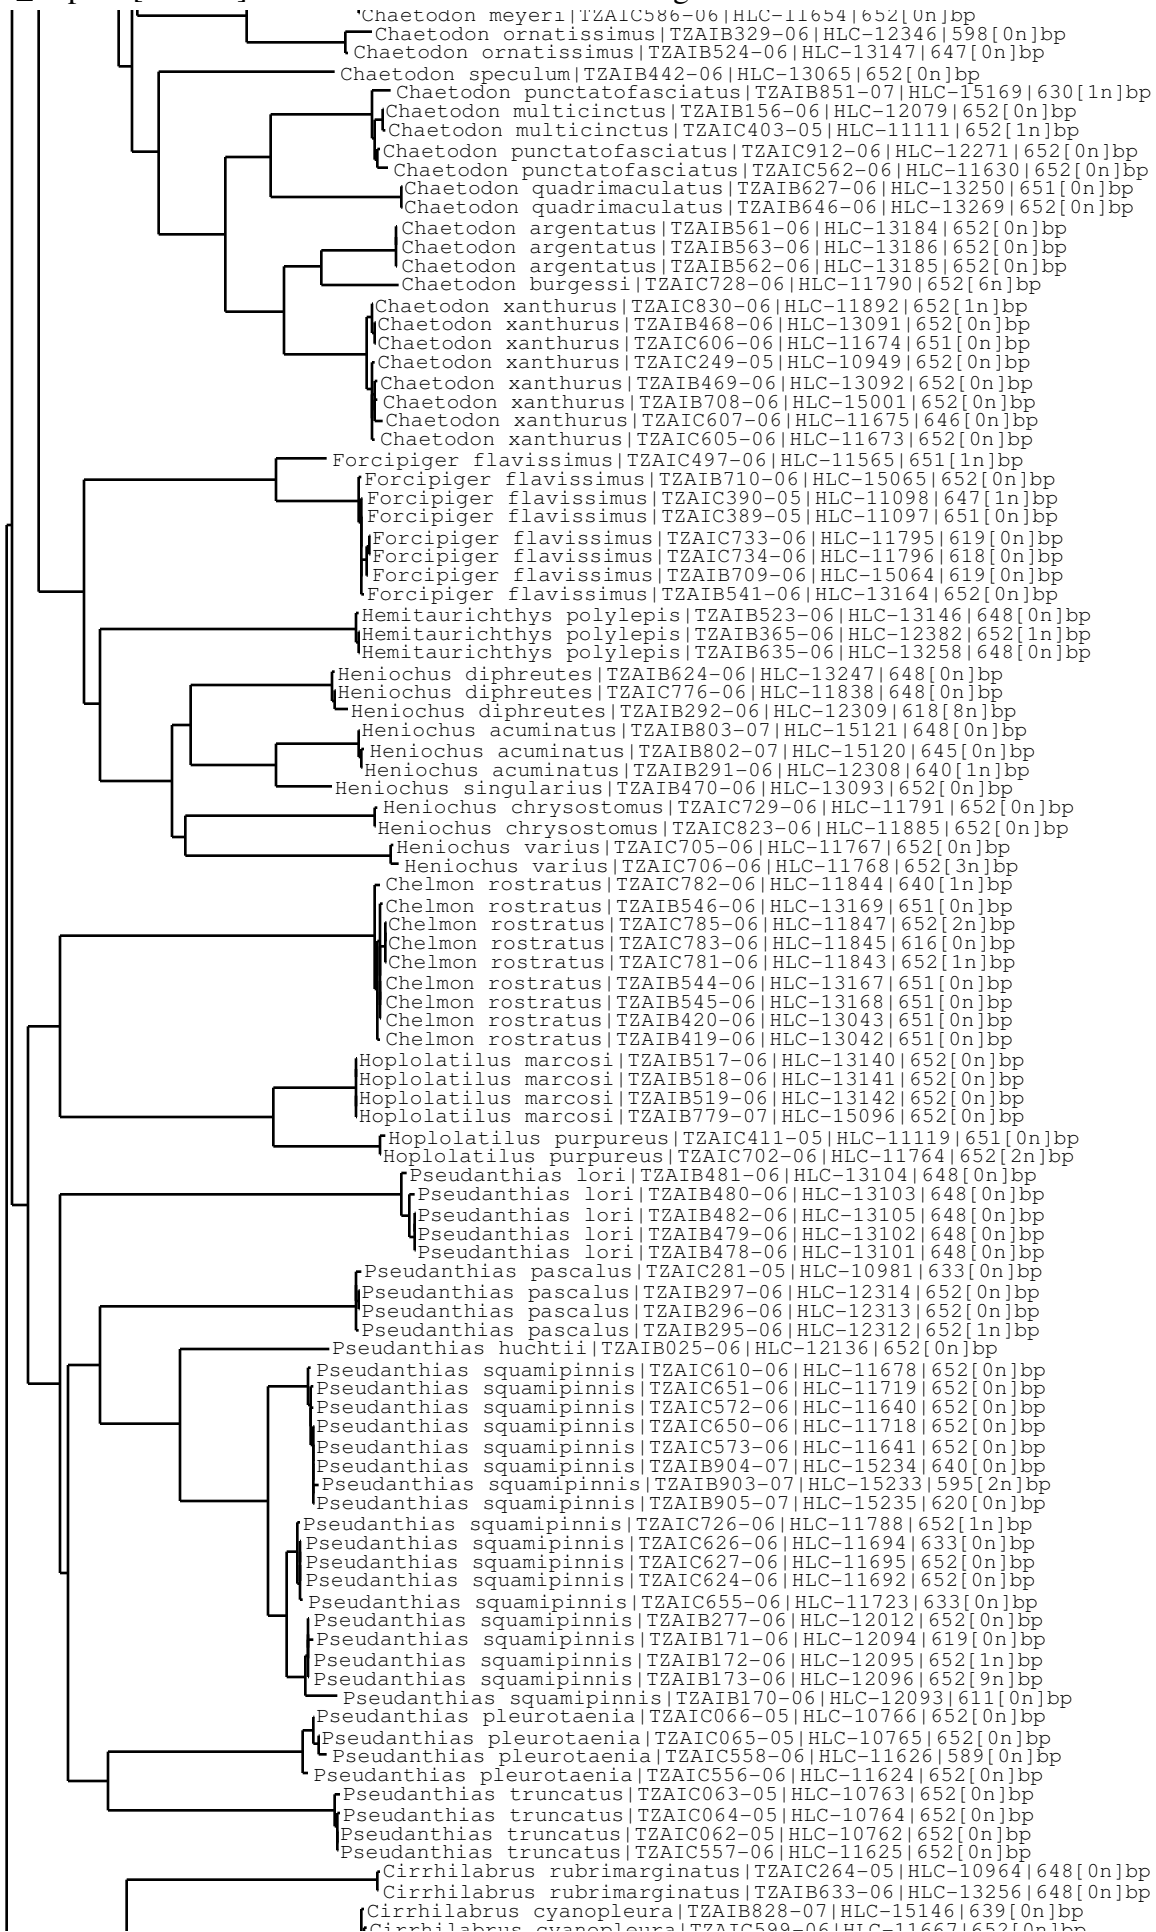

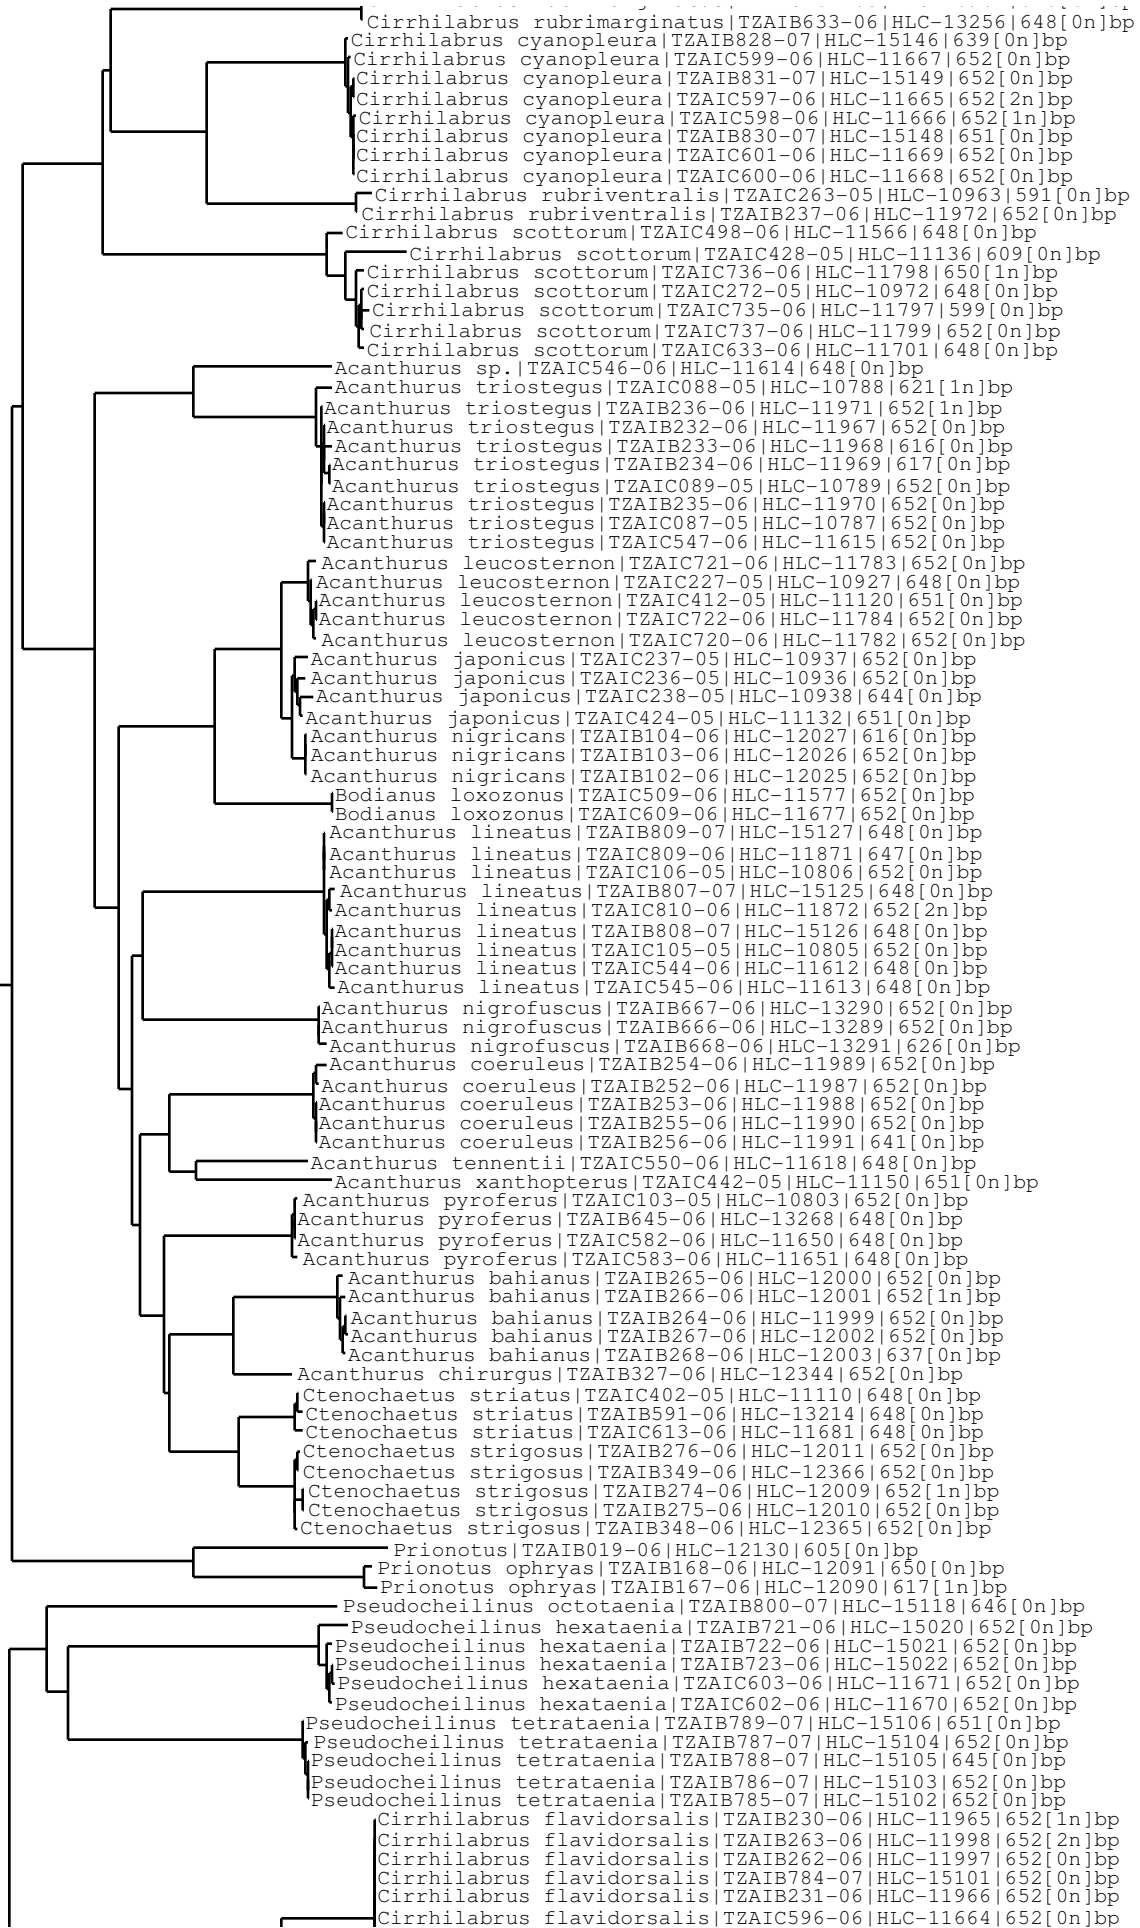

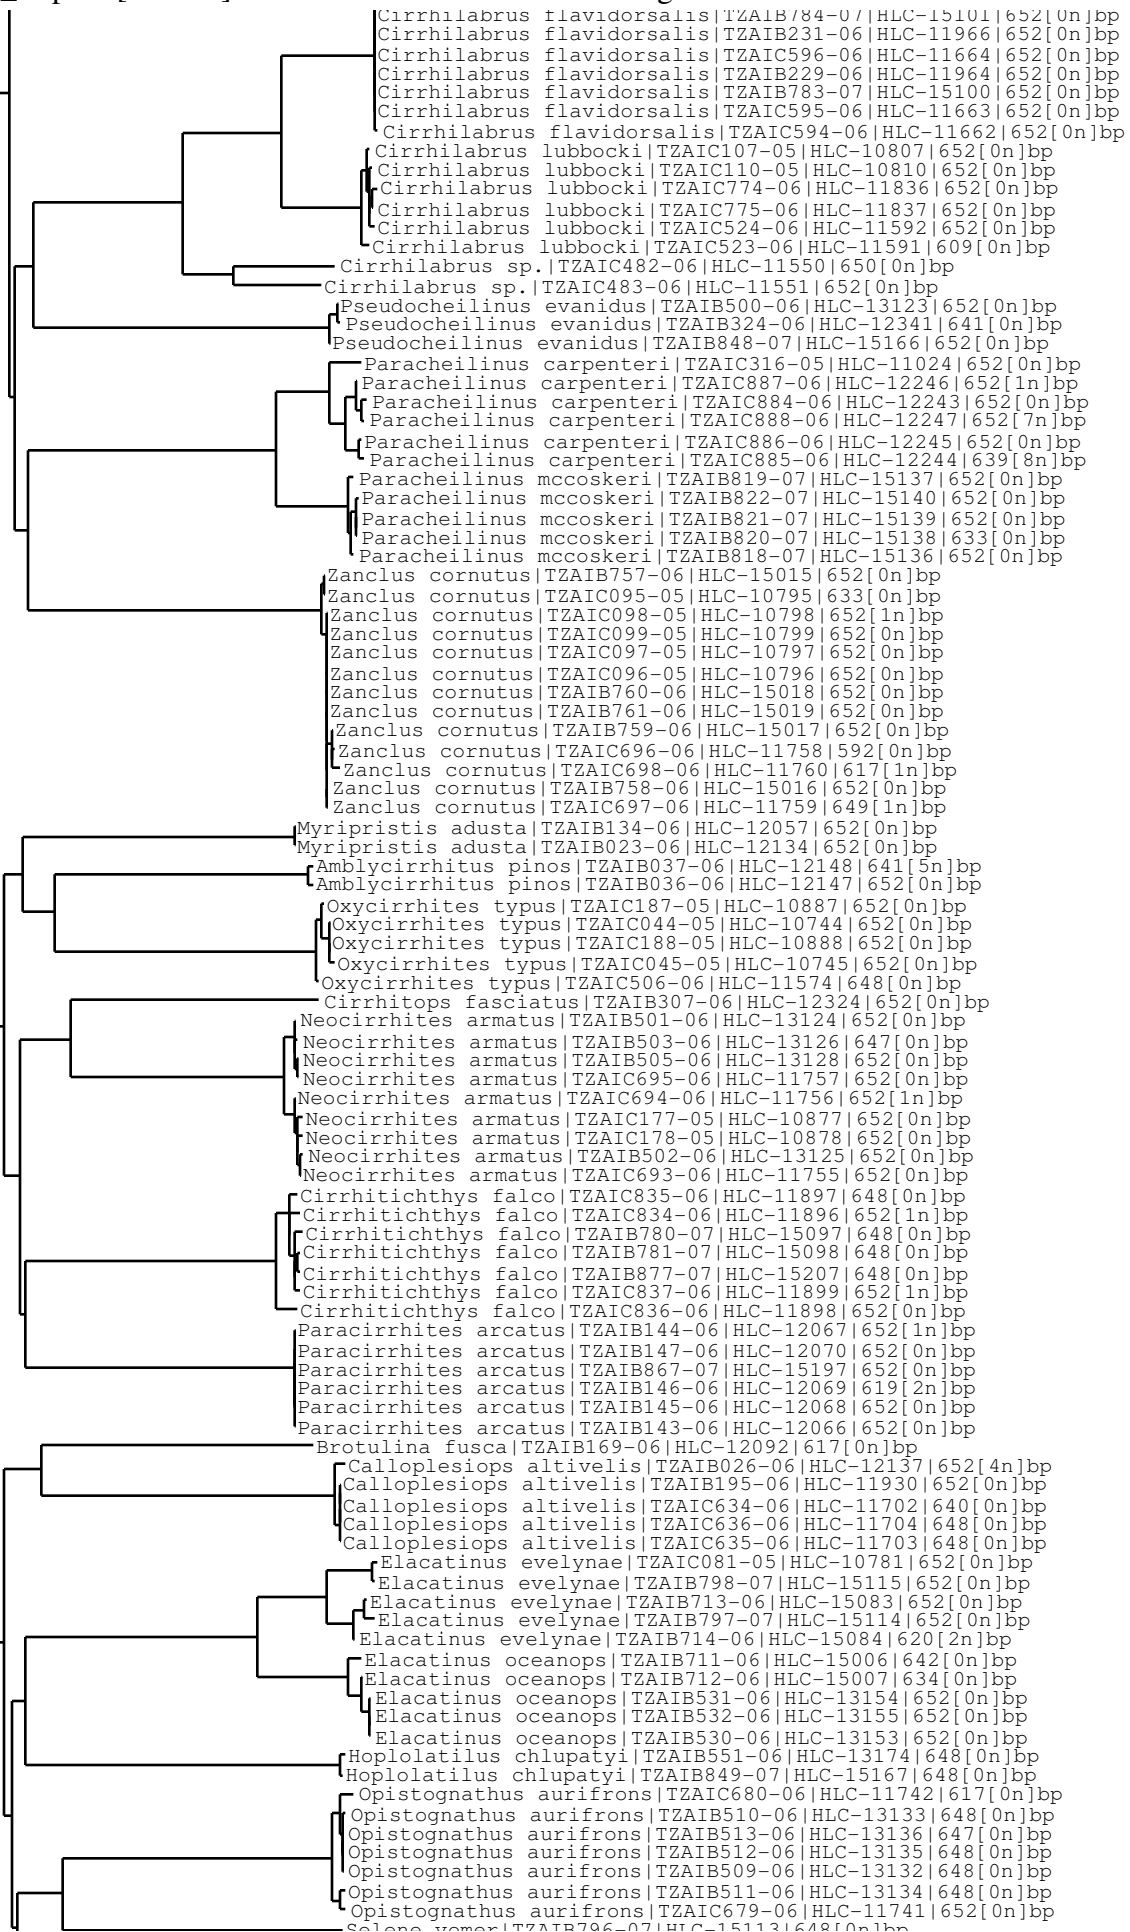

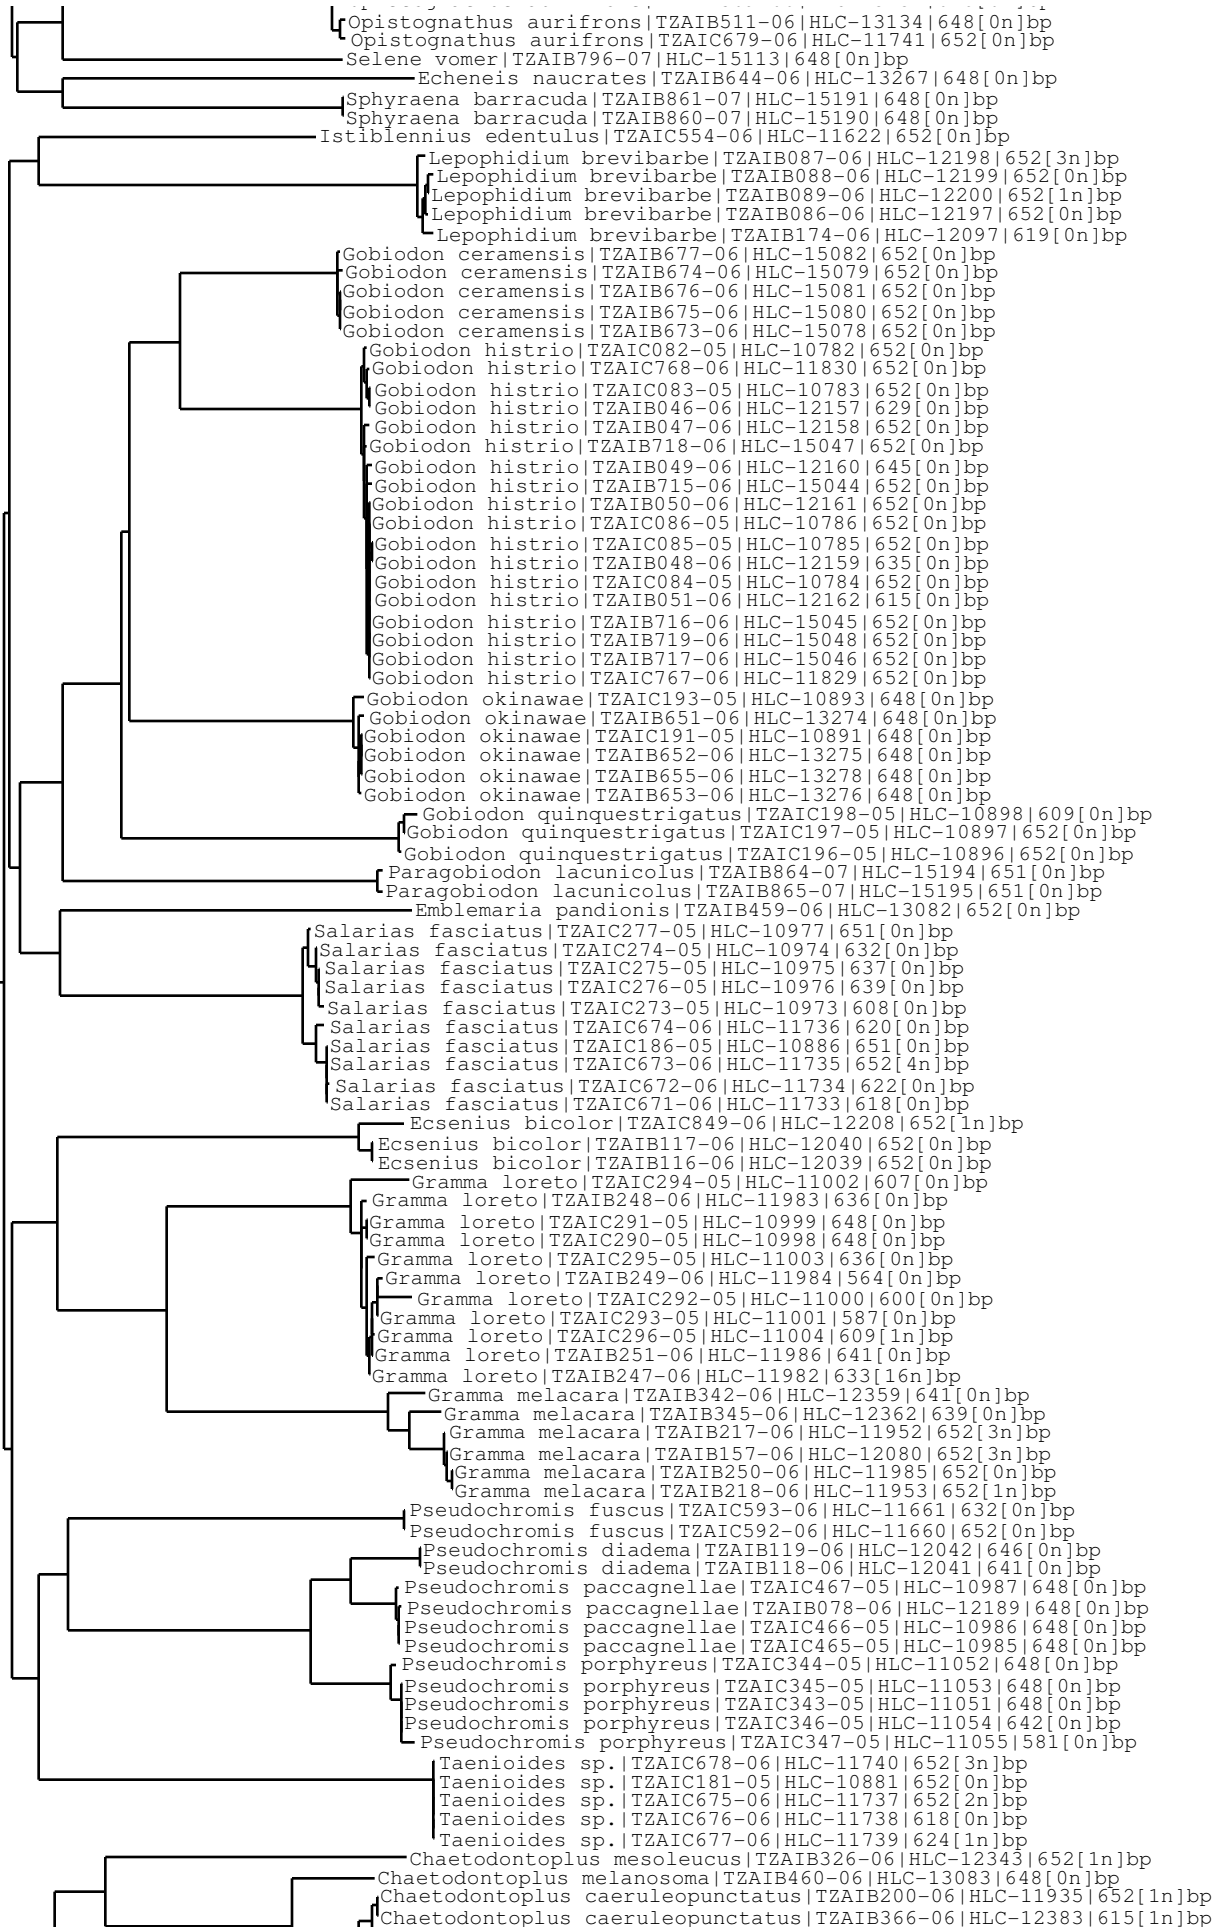

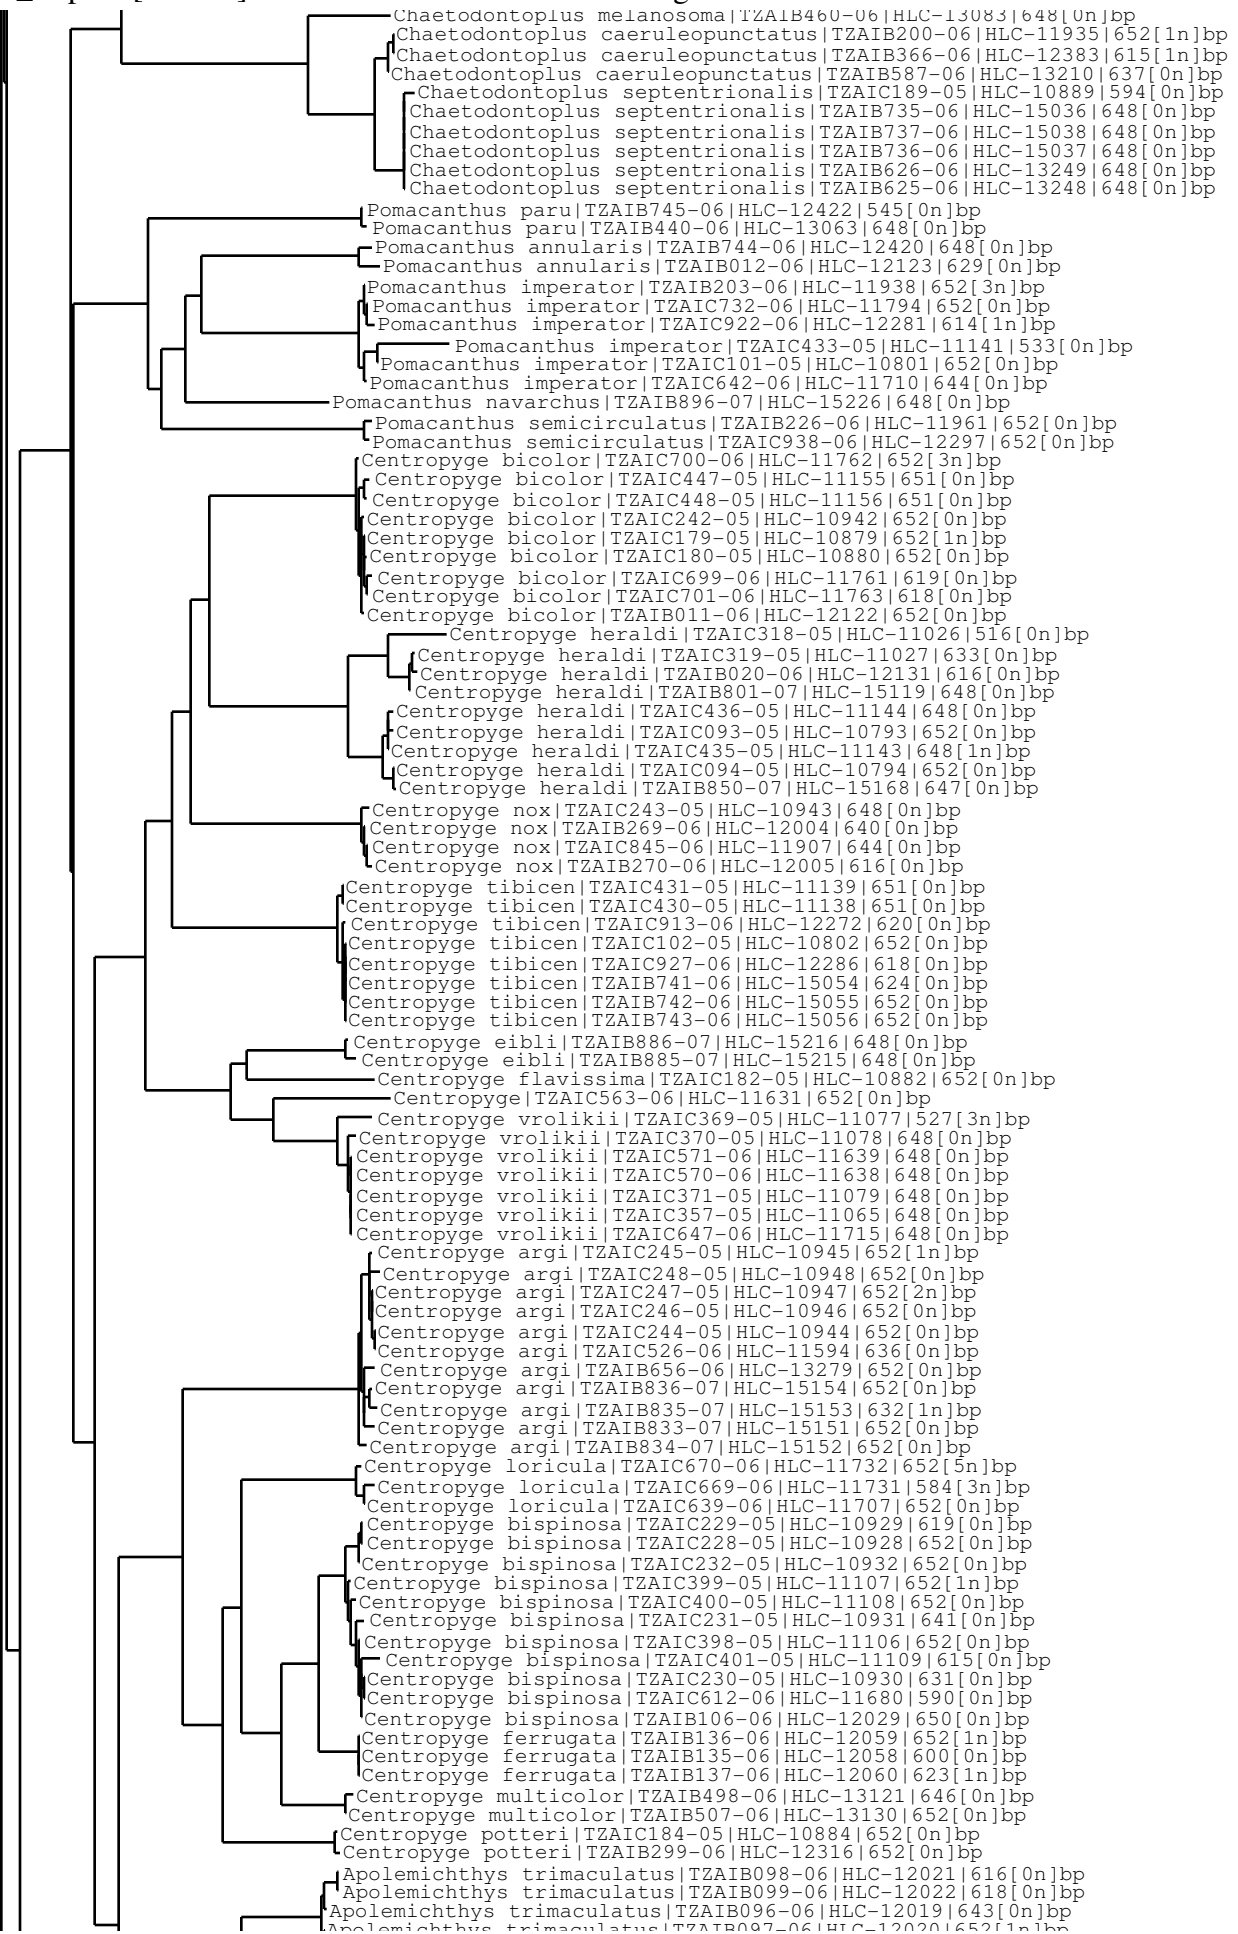

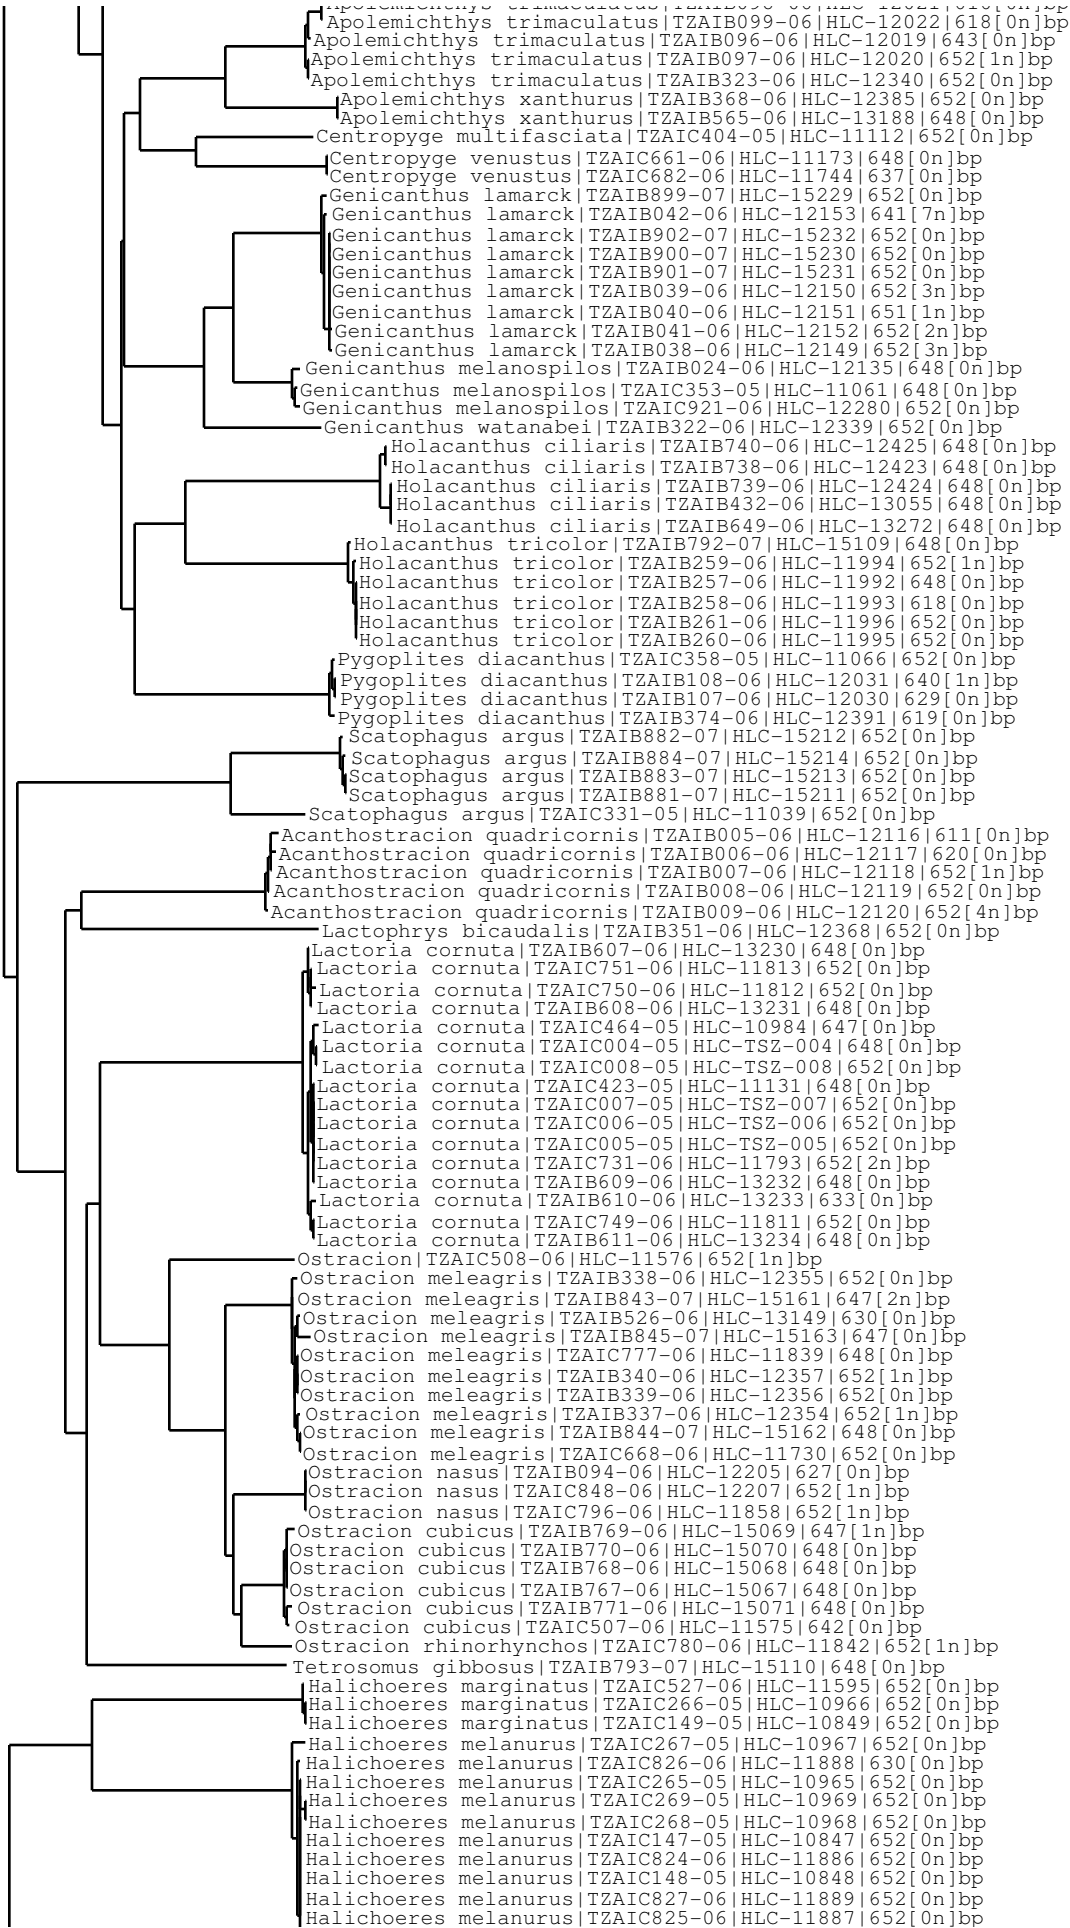

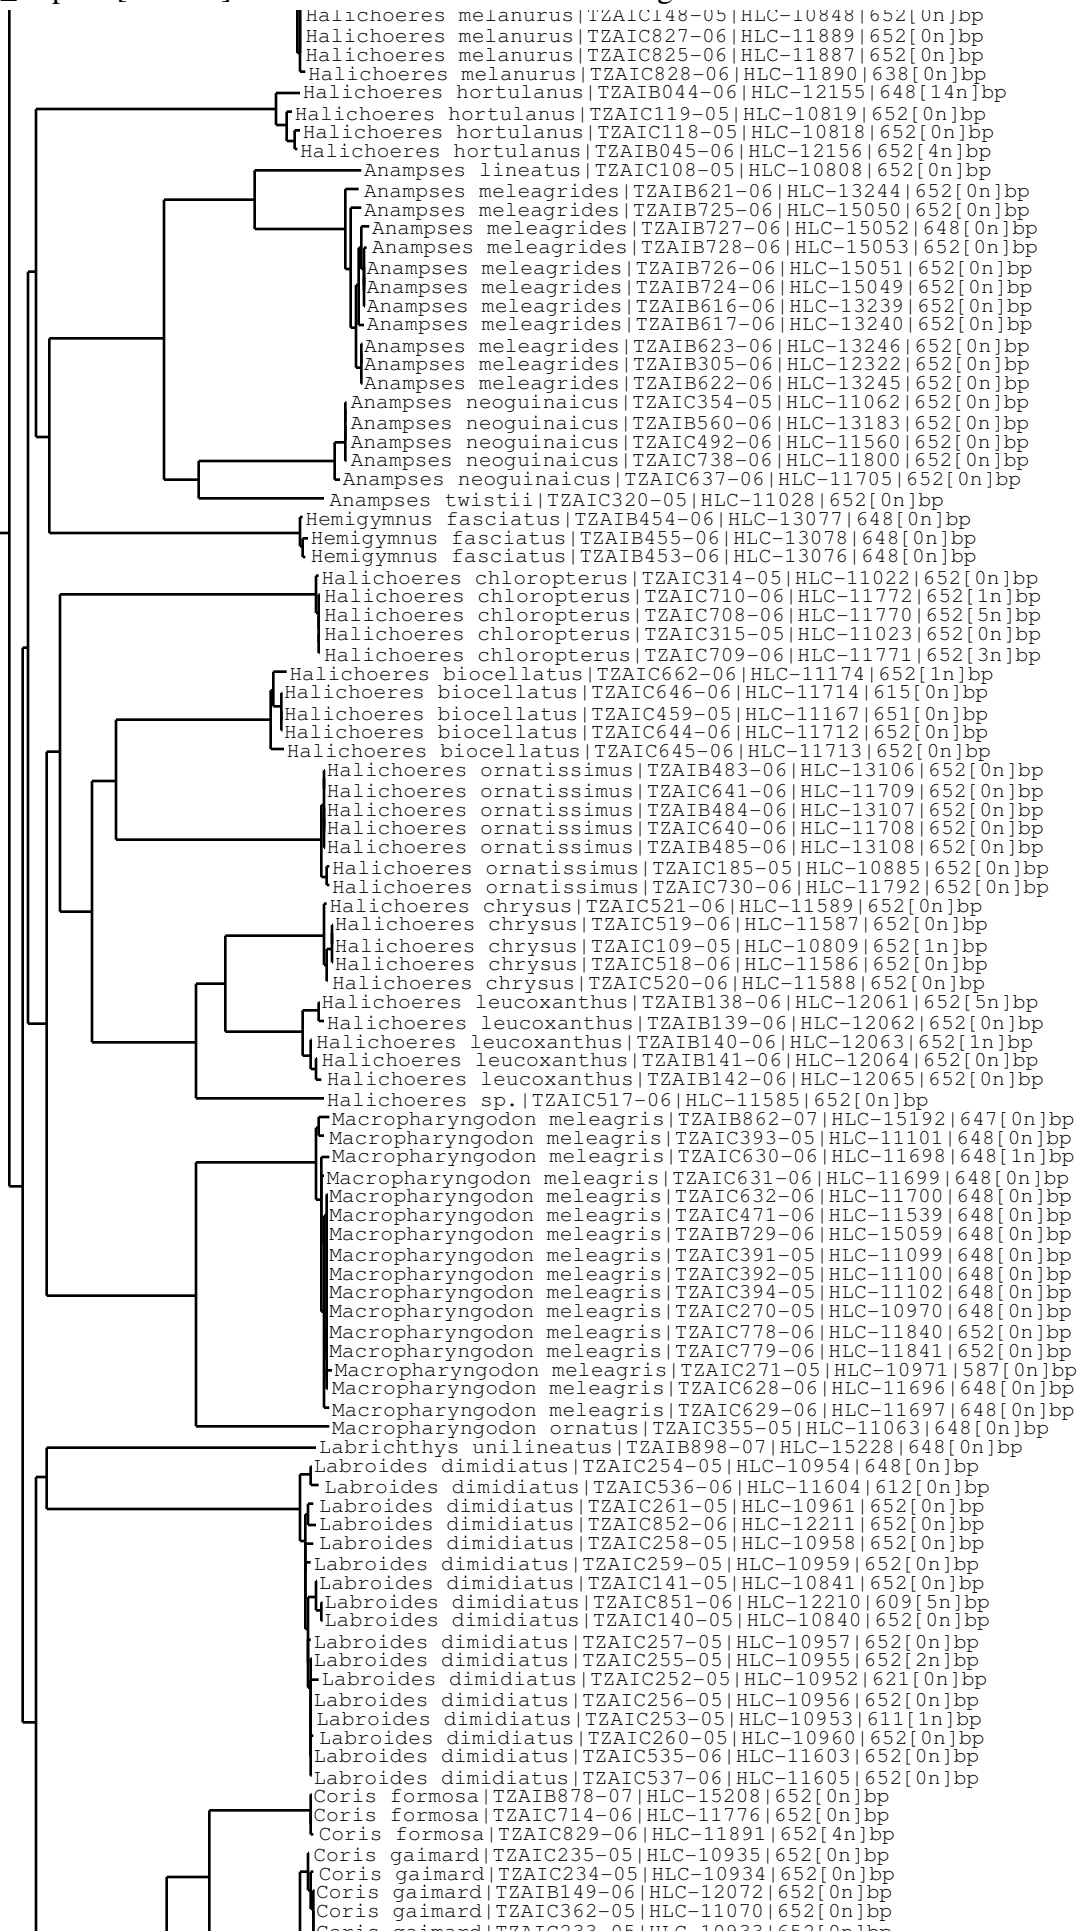



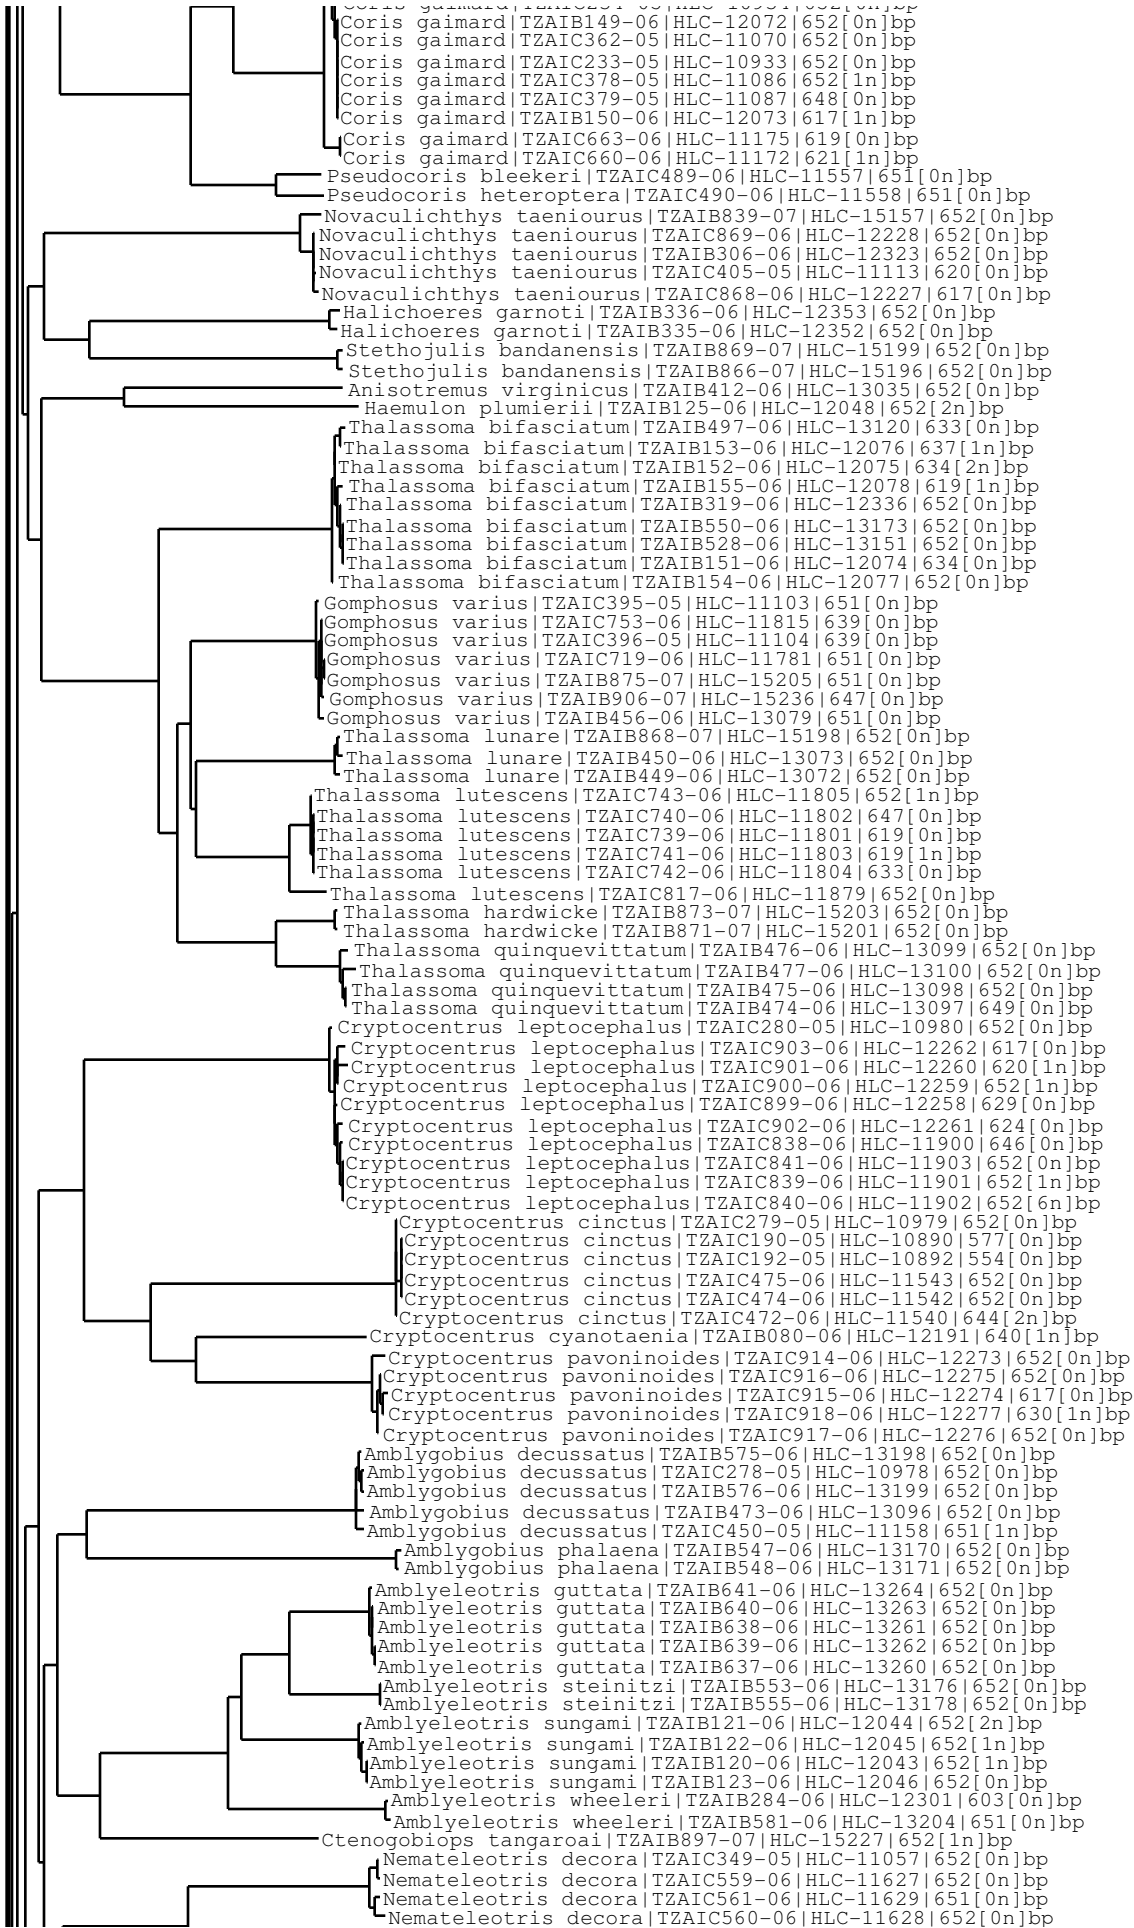

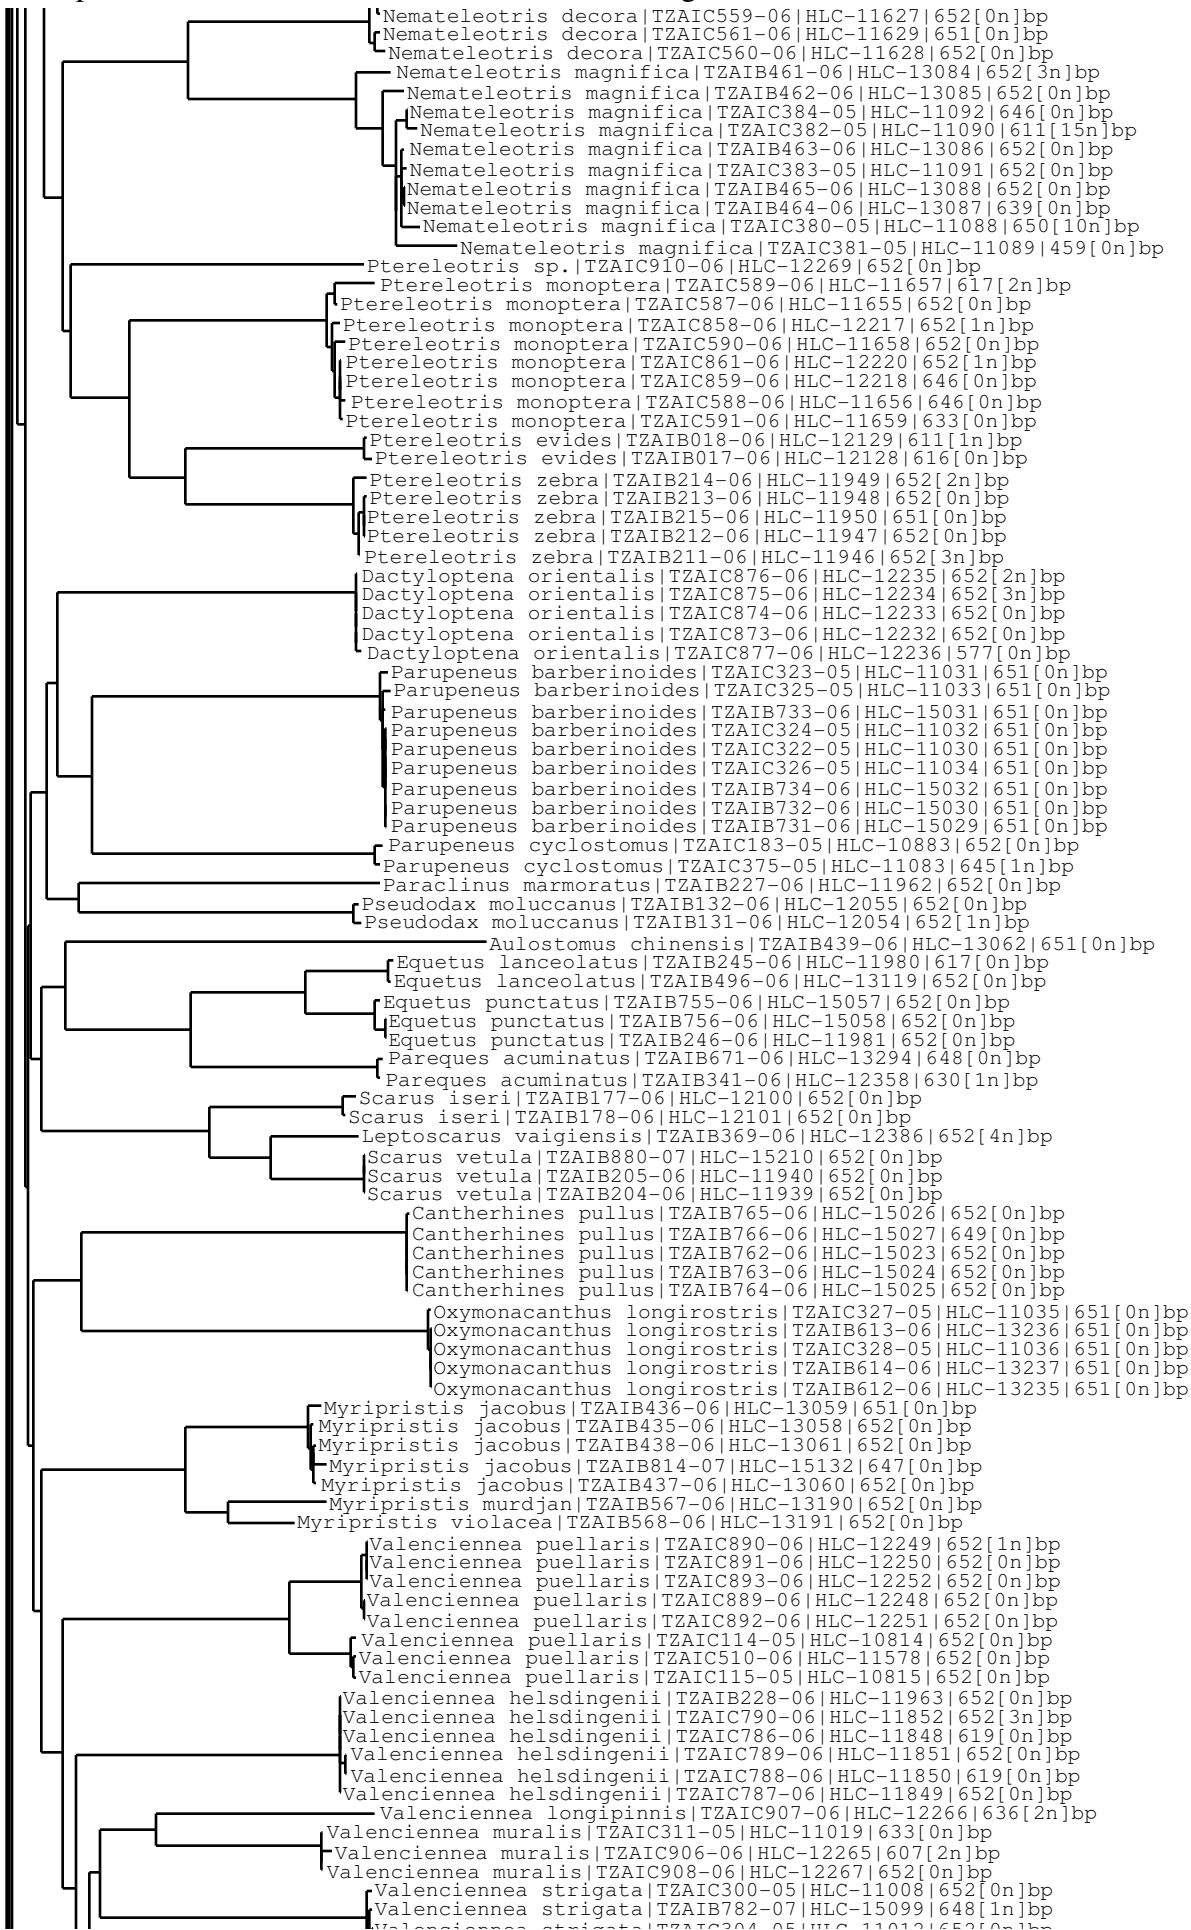

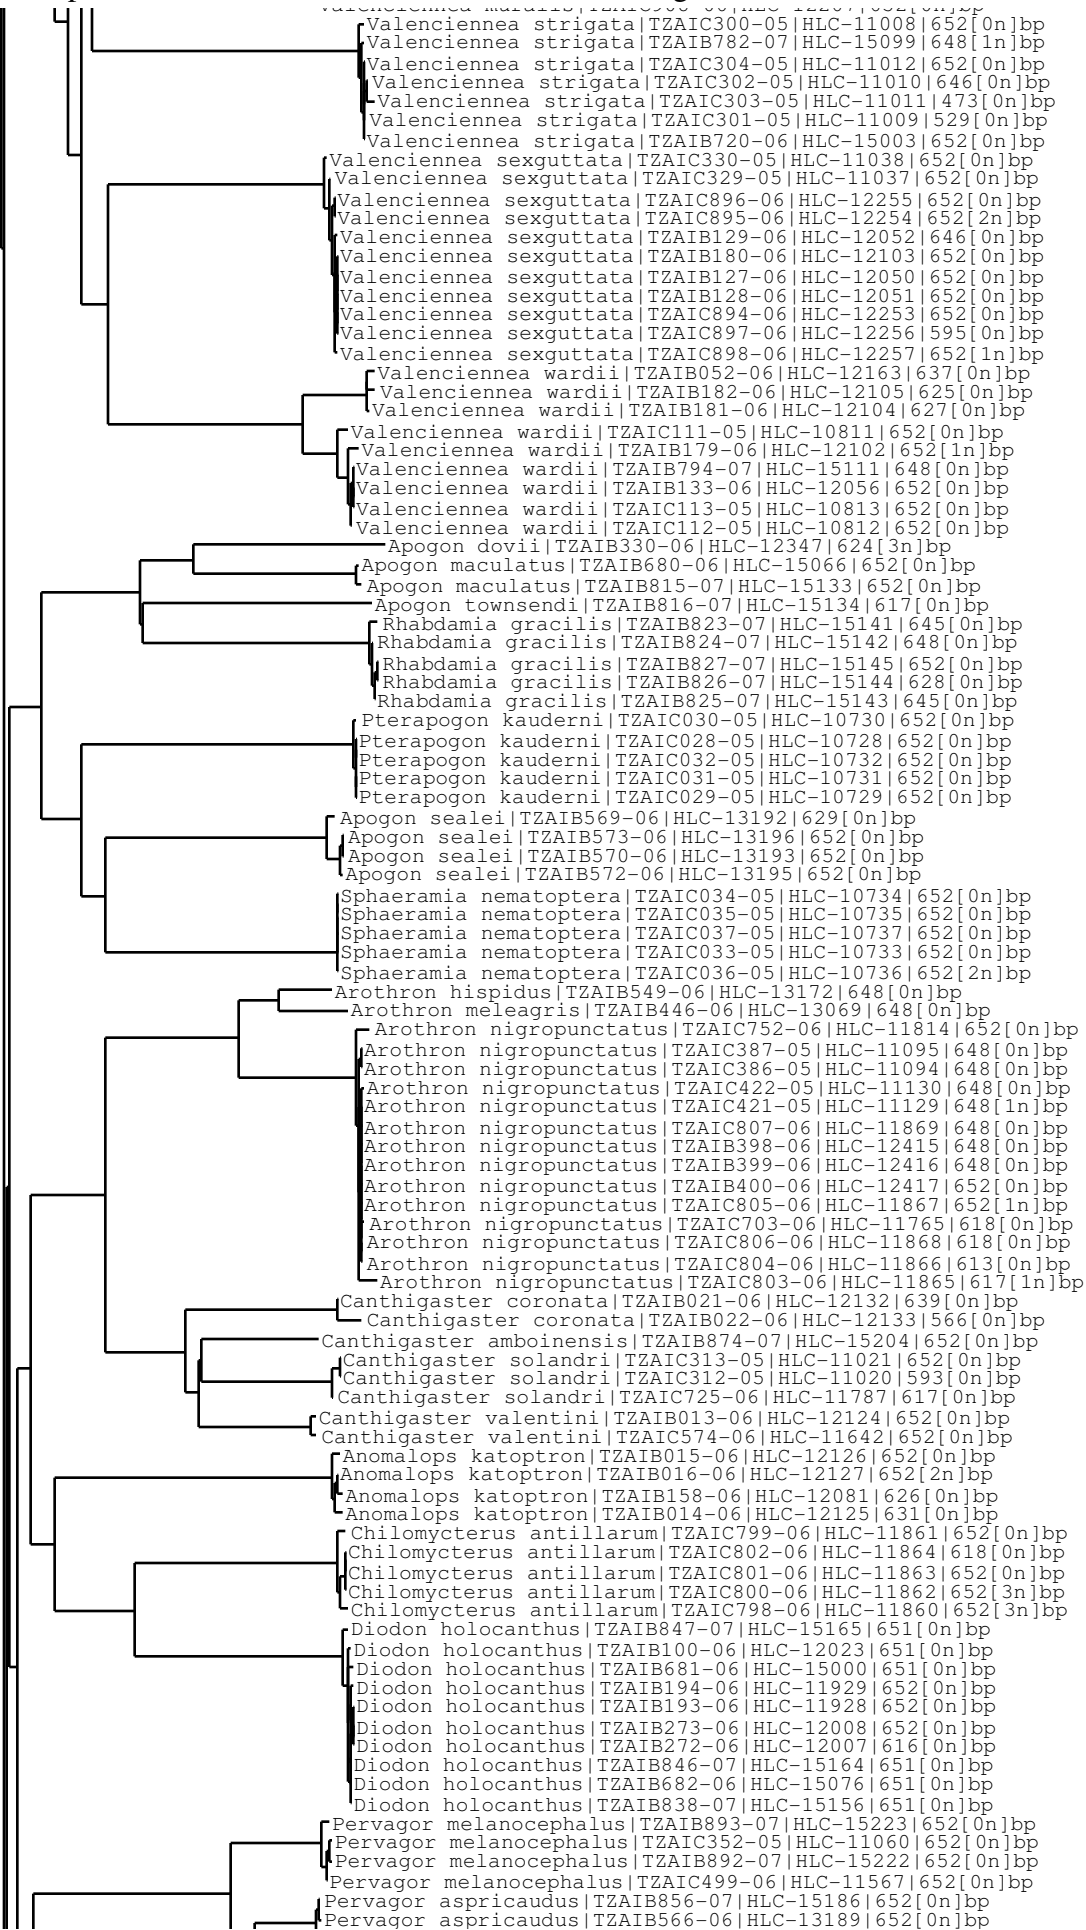

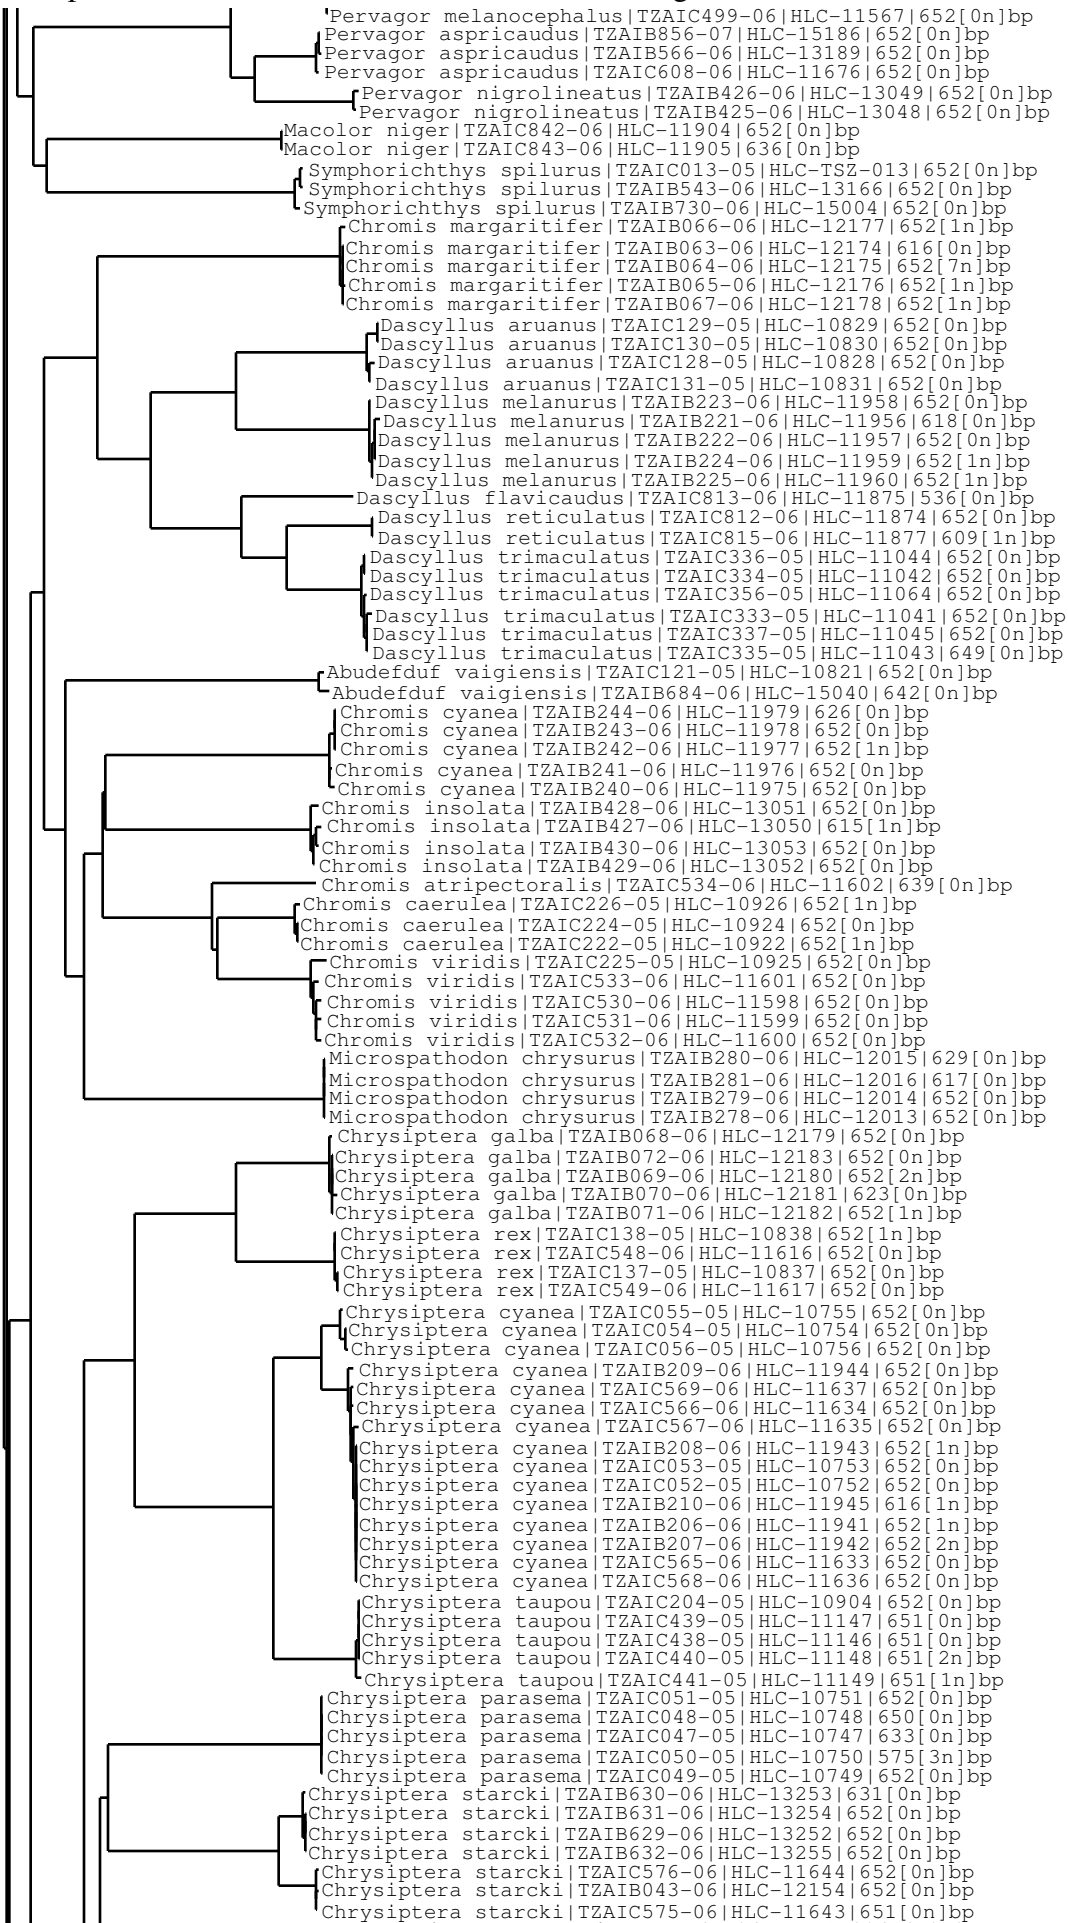

Chrysiptera starcki|TZAIB043-06|HLC-12154|652[0n]bp  
 Chrysiptera starcki|TZAIC575-06|HLC-11643|651[0n]bp  
 Chrysiptera talboti|TZAIC764-06|HLC-11826|652[0n]bp  
 Chrysiptera talboti|TZAIC765-06|HLC-11827|630[2n]bp  
 Chrysiptera talboti|TZAIC761-06|HLC-11823|621[0n]bp  
 Chrysiptera talboti|TZAIC762-06|HLC-11824|618[0n]bp  
 Dischistodus prosopotaenia|TZAIC855-06|HLC-12214|619[0n]bp  
 Dischistodus pseudochrysopoecilus|TZAIC854-06|HLC-12213|652[1n]bp  
 Dischistodus pseudochrysopoecilus|TZAIC856-06|HLC-12215|652[0n]bp  
 Dischistodus pseudochrysopoecilus|TZAIC857-06|HLC-12216|652[0n]bp  
 Dischistodus pseudochrysopoecilus|TZAIC853-06|HLC-12212|652[0n]bp  
 Pomacentrus alleni|TZAIB085-06|HLC-12196|652[0n]bp  
 Pomacentrus alleni|TZAIB084-06|HLC-12195|617[1n]bp  
 Pomacentrus alleni|TZAIB082-06|HLC-12193|623[0n]bp  
 Pomacentrus alleni|TZAIB081-06|HLC-12192|652[2n]bp  
 Pomacentrus alleni|TZAIB083-06|HLC-12194|652[1n]bp  
 Pomacentrus caeruleus|TZAIC688-06|HLC-11750|652[2n]bp  
 Pomacentrus caeruleus|TZAIC690-06|HLC-11752|652[4n]bp  
 Pomacentrus caeruleus|TZAIC689-06|HLC-11751|652[1n]bp  
 Pomacentrus caeruleus|TZAIC691-06|HLC-11753|652[1n]bp  
 Pomacentrus caeruleus|TZAIC692-06|HLC-11754|652[2n]bp  
 Pomacentrus coelestis|TZAIC757-06|HLC-11819|652[0n]bp  
 Pomacentrus coelestis|TZAIC756-06|HLC-11818|651[5n]bp  
 Pomacentrus coelestis|TZAIC755-06|HLC-11817|624[0n]bp  
 Pomacentrus coelestis|TZAIC754-06|HLC-11816|623[0n]bp  
 Pomacentrus moluccensis|TZAIC373-05|HLC-11081|652[0n]bp  
 Pomacentrus moluccensis|TZAIC372-05|HLC-11080|652[1n]bp  
 Pomacentrus moluccensis|TZAIC449-05|HLC-11157|615[6n]bp  
 Pomacentrus moluccensis|TZAIC374-05|HLC-11082|615[0n]bp  
 Pomacentrus moluccensis|TZAIC760-06|HLC-11822|619[0n]bp  
 Pomacentrus moluccensis|TZAIC759-06|HLC-11821|619[0n]bp  
 Pomacentrus nagasakiensis|TZAIC865-06|HLC-12224|645[0n]bp  
 Pomacentrus nagasakiensis|TZAIC863-06|HLC-12222|634[0n]bp  
 Pomacentrus nagasakiensis|TZAIC864-06|HLC-12223|634[1n]bp  
 Pomacentrus nagasakiensis|TZAIC866-06|HLC-12225|621[0n]bp  
 Neoglyphidodon melas|TZAIC201-05|HLC-10901|652[0n]bp  
 Neoglyphidodon melas|TZAIC202-05|HLC-10902|652[0n]bp  
 Neoglyphidodon melas|TZAIC203-05|HLC-10903|652[1n]bp  
 Neoglyphidodon melas|TZAIC200-05|HLC-10900|621[0n]bp  
 Neoglyphidodon melas|TZAIC199-05|HLC-10899|652[0n]bp  
 Neoglyphidodon nigroris|TZAIB114-06|HLC-12037|652[1n]bp  
 Neoglyphidodon nigroris|TZAIB113-06|HLC-12036|639[1n]bp  
 Neoglyphidodon nigroris|TZAIB115-06|HLC-12038|631[0n]bp  
 Neoglyphidodon nigroris|TZAIB111-06|HLC-12034|652[0n]bp  
 Neoglyphidodon nigroris|TZAIB112-06|HLC-12035|617[0n]bp  
 Neoglyphidodon oxyodon|TZAIC124-05|HLC-10824|652[1n]bp  
 Neoglyphidodon oxyodon|TZAIC122-05|HLC-10822|652[0n]bp  
 Neoglyphidodon oxyodon|TZAIC125-05|HLC-10825|652[0n]bp  
 Neoglyphidodon oxyodon|TZAIC126-05|HLC-10826|652[0n]bp  
 Neoglyphidodon oxyodon|TZAIC123-05|HLC-10823|652[0n]bp  
 Amphiprion ocellaris|TZAIC208-05|HLC-10908|651[0n]bp  
 Amphiprion ocellaris|TZAIC205-05|HLC-10905|651[1n]bp  
 Amphiprion ocellaris|TZAIC206-05|HLC-10906|641[0n]bp  
 Amphiprion ocellaris|TZAIC068-05|HLC-10768|652[0n]bp  
 Amphiprion ocellaris|TZAIC071-05|HLC-10771|652[0n]bp  
 Amphiprion ocellaris|TZAIC069-05|HLC-10769|652[0n]bp  
 Amphiprion ocellaris|TZAIC209-05|HLC-10909|651[0n]bp  
 Amphiprion ocellaris|TZAIC207-05|HLC-10907|641[0n]bp  
 Amphiprion ocellaris|TZAIC067-05|HLC-10767|652[0n]bp  
 Amphiprion ocellaris|TZAIC070-05|HLC-10770|652[0n]bp  
 Amphiprion chrysopterus|TZAIC616-06|HLC-11684|600[0n]bp  
 Amphiprion chrysopterus|TZAIC615-06|HLC-11683|651[0n]bp  
 Amphiprion chrysopterus|TZAIC614-06|HLC-11682|651[0n]bp  
 Amphiprion chrysopterus|TZAIC618-06|HLC-11686|651[0n]bp  
 Amphiprion chrysopterus|TZAIC617-06|HLC-11685|651[0n]bp  
 Amphiprion nigripes|TZAIC075-05|HLC-10775|652[1n]bp  
 Amphiprion nigripes|TZAIC413-05|HLC-11121|651[2n]bp  
 Amphiprion nigripes|TZAIC221-05|HLC-10921|651[1n]bp  
 Amphiprion nigripes|TZAIC220-05|HLC-10920|651[0n]bp  
 Amphiprion nigripes|TZAIC415-05|HLC-11123|651[0n]bp  
 Amphiprion nigripes|TZAIC414-05|HLC-11122|651[0n]bp  
 Amphiprion nigripes|TZAIC072-05|HLC-10772|652[0n]bp  
 Amphiprion nigripes|TZAIC073-05|HLC-10773|652[0n]bp  
 Amphiprion nigripes|TZAIC074-05|HLC-10774|652[0n]bp  
 Amphiprion nigripes|TZAIC076-05|HLC-10776|652[0n]bp  
 Amphiprion nigripes|TZAIC502-06|HLC-11570|604[0n]bp  
 Amphiprion frenatus|TZAIC487-06|HLC-11555|651[0n]bp  
 Amphiprion melanopus|TZAIC486-06|HLC-11554|651[0n]bp  
 Amphiprion melanopus|TZAIC142-05|HLC-10842|652[0n]bp  
 Amphiprion melanopus|TZAIC429-05|HLC-11137|651[0n]bp  
 Amphiprion melanopus|TZAIC143-05|HLC-10843|651[0n]bp  
 Amphiprion melanopus|TZAIC145-05|HLC-10845|651[0n]bp  
 Amphiprion melanopus|TZAIC144-05|HLC-10844|652[0n]bp  
 Amphiprion melanopus|TZAIC146-05|HLC-10846|651[0n]bp  
 Amphiprion melanopus|TZAIB053-06|HLC-12164|652[1n]bp  
 Amphiprion melanopus|TZAIB054-06|HLC-12165|652[2n]bp  
 Amphiprion melanopus|TZAIB057-06|HLC-12168|652[1n]bp  
 Amphiprion melanopus|TZAIB056-06|HLC-12167|619[0n]bp  
 Amphiprion melanopus|TZAIB055-06|HLC-12166|652[0n]bp  
 Amphiprion melanopus|TZAIC585-06|HLC-11653|651[0n]bp  
 Amphiprion latifasciatus|TZAIC211-05|HLC-10911|651[0n]bp  
 Amphiprion chrysogaster|TZAIC214-05|HLC-10914|651[0n]bp  
 Amphiprion chrysogaster|TZAIC213-05|HLC-10913|651[0n]bp  
 Amphiprion chrysogaster|TZAIC685-06|HLC-11747|652[1n]bp  
 Amphiprion chrysogaster|TZAIB285-06|HLC-12302|652[1n]bp  
 Amphiprion chrysogaster|TZAIB289-06|HLC-12306|652[1n]bp  
 Amphiprion chrysogaster|TZAIB287-06|HLC-12304|652[0n]bp  
 Amphiprion chrysogaster|TZAIB286-06|HLC-12303|652[0n]bp  
 Amphiprion chrysogaster|TZAIB288-06|HLC-12305|652[0n]bp

Amphiprion chrysogaster|TZAIB287-06|HLC-12304|652[0n]bp  
 Amphiprion chrysogaster|TZAIB286-06|HLC-12303|652[0n]bp  
 Amphiprion chrysogaster|TZAIB288-06|HLC-12305|652[0n]bp  
 Amphiprion chrysogaster|TZAIC687-06|HLC-11749|621[1n]bp  
 Amphiprion chrysogaster|TZAIB385-06|HLC-12402|644[0n]bp  
 Amphiprion chrysogaster|TZAIC686-06|HLC-11748|619[0n]bp  
 Amphiprion chrysogaster|TZAIC684-06|HLC-11746|619[3n]bp  
 Amphiprion chrysogaster|TZAIC683-06|HLC-11745|651[0n]bp  
 Amphiprion polymnus|TZAIB752-06|HLC-13298|651[0n]bp  
 Amphiprion polymnus|TZAIB754-06|HLC-13300|651[0n]bp  
 Amphiprion polymnus|TZAIB751-06|HLC-13297|651[0n]bp  
 Amphiprion polymnus|TZAIB753-06|HLC-13299|651[0n]bp  
 Amphiprion polymnus|TZAIB750-06|HLC-13296|651[0n]bp  
 Amphiprion polymnus|TZAIC515-06|HLC-11583|651[0n]bp  
 Amphiprion polymnus|TZAIC139-05|HLC-10839|651[0n]bp  
 Amphiprion akallopisos|TZAIB749-06|HLC-15075|638[0n]bp  
 Amphiprion akallopisos|TZAIC364-05|HLC-11072|651[0n]bp  
 Amphiprion akallopisos|TZAIB748-06|HLC-15034|651[0n]bp  
 Amphiprion akallopisos|TZAIB747-06|HLC-15033|651[0n]bp  
 Amphiprion akallopisos|TZAIB079-06|HLC-12190|652[0n]bp  
 Amphiprion akallopisos|TZAIB433-06|HLC-13056|651[0n]bp  
 Amphiprion akallopisos|TZAIC367-05|HLC-11075|651[0n]bp  
 Amphiprion akallopisos|TZAIB812-07|HLC-15130|651[0n]bp  
 Amphiprion akallopisos|TZAIC363-05|HLC-11071|651[0n]bp  
 Amphiprion akallopisos|TZAIC365-05|HLC-11073|651[0n]bp  
 Amphiprion akallopisos|TZAIB542-06|HLC-13165|651[0n]bp  
 Amphiprion akallopisos|TZAIB520-06|HLC-13143|651[0n]bp  
 Amphiprion perideraion|TZAIB061-06|HLC-12172|652[1n]bp  
 Amphiprion perideraion|TZAIB062-06|HLC-12173|619[0n]bp  
 Amphiprion perideraion|TZAIB060-06|HLC-12171|652[0n]bp  
 Amphiprion perideraion|TZAIB059-06|HLC-12170|651[0n]bp  
 Amphiprion perideraion|TZAIC218-05|HLC-10918|651[0n]bp  
 Amphiprion perideraion|TZAIC217-05|HLC-10917|651[0n]bp  
 Amphiprion perideraion|TZAIC219-05|HLC-10919|651[0n]bp  
 Amphiprion perideraion|TZAIC215-05|HLC-10915|651[0n]bp  
 Amphiprion perideraion|TZAIC216-05|HLC-10916|651[0n]bp  
 Amphiprion perideraion|TZAIB058-06|HLC-12169|631[1n]bp  
 Amphiprion perideraion|TZAIC496-06|HLC-11564|651[0n]bp  
 Amphiprion perideraion|TZAIC366-05|HLC-11074|651[0n]bp  
 Amphiprion sandaracinos|TZAIC494-06|HLC-11562|651[0n]bp  
 Amphiprion sandaracinos|TZAIC495-06|HLC-11563|651[0n]bp  
 Amphiprion sandaracinos|TZAIC493-06|HLC-11561|651[0n]bp  
 Amphiprion clarkii|TZAIC210-05|HLC-10910|651[0n]bp  
 Amphiprion clarkii|TZAIC212-05|HLC-10912|651[0n]bp  
 Amphiprion clarkii|TZAIC833-06|HLC-11895|625[0n]bp  
 Amphiprion sebae|TZAIB421-06|HLC-13044|651[0n]bp  
 Amphiprion sebae|TZAIB669-06|HLC-13292|651[0n]bp  
 Amphiprion sebae|TZAIB423-06|HLC-13046|651[1n]bp  
 Amphiprion sebae|TZAIB422-06|HLC-13045|651[0n]bp  
 Amphiprion sebae|TZAIC880-06|HLC-12239|619[1n]bp  
 Amphiprion sebae|TZAIC133-05|HLC-10833|652[0n]bp  
 Amphiprion sebae|TZAIC134-05|HLC-10834|651[0n]bp  
 Amphiprion sebae|TZAIC883-06|HLC-12242|652[3n]bp  
 Amphiprion sebae|TZAIC881-06|HLC-12240|618[0n]bp  
 Amphiprion sebae|TZAIC882-06|HLC-12241|540[1n]bp  
 Amphiprion sebae|TZAIC136-05|HLC-10836|651[0n]bp  
 Amphiprion sebae|TZAIC132-05|HLC-10832|651[0n]bp  
 Amphiprion sebae|TZAIC135-05|HLC-10835|651[0n]bp  
 Amphiprion sebae|TZAIC832-06|HLC-11894|652[0n]bp  
 Premnas biaculeatus|TZAIC704-06|HLC-11766|619[0n]bp  
 Premnas biaculeatus|TZAIC419-05|HLC-11127|651[0n]bp  
 Premnas biaculeatus|TZAIC418-05|HLC-11126|651[0n]bp  
 Premnas biaculeatus|TZAIC417-05|HLC-11125|651[0n]bp  
 Premnas biaculeatus|TZAIC420-05|HLC-11128|651[0n]bp  
 Premnas biaculeatus|TZAIC361-05|HLC-11069|652[0n]bp  
 Premnas biaculeatus|TZAIC622-06|HLC-11690|596[0n]bp  
 Premnas biaculeatus|TZAIC619-06|HLC-11687|641[0n]bp  
 Premnas biaculeatus|TZAIC620-06|HLC-11688|652[0n]bp  
 Premnas biaculeatus|TZAIC621-06|HLC-11689|652[0n]bp  
 Chaetodipterus faber|TZAIB457-06|HLC-13080|652[0n]bp  
 Platax pinnatus|TZAIB804-07|HLC-15122|652[0n]bp  
 Platax pinnatus|TZAIC297-05|HLC-11005|652[0n]bp  
 Platax orbicularis|TZAIB535-06|HLC-13158|652[0n]bp  
 Platax orbicularis|TZAIB537-06|HLC-13160|652[0n]bp  
 Platax orbicularis|TZAIB536-06|HLC-13159|652[0n]bp  
 Platax orbicularis|TZAIB534-06|HLC-13157|652[0n]bp  
 Platax orbicularis|TZAIB148-06|HLC-12071|626[0n]bp  
 Platax teira|TZAIB538-06|HLC-13161|652[0n]bp  
 Serranocirrhitus latus|TZAIB219-06|HLC-11954|652[0n]bp  
 Serranocirrhitus latus|TZAIC425-05|HLC-11133|651[0n]bp  
 Serranocirrhitus latus|TZAIC120-05|HLC-10820|652[0n]bp  
 Serranocirrhitus latus|TZAIB220-06|HLC-11955|652[0n]bp  
 Serranocirrhitus latus|TZAIC426-05|HLC-11134|651[3n]bp  
 Dendrochirus biocellatus|TZAIC376-05|HLC-11084|651[0n]bp  
 Dendrochirus brachypterus|TZAIB093-06|HLC-12204|651[0n]bp  
 Dendrochirus brachypterus|TZAIB599-06|HLC-13222|651[0n]bp  
 Dendrochirus brachypterus|TZAIB596-06|HLC-13219|651[0n]bp  
 Dendrochirus brachypterus|TZAIB597-06|HLC-13220|651[0n]bp  
 Dendrochirus brachypterus|TZAIB598-06|HLC-13221|651[0n]bp  
 Dendrochirus zebra|TZAIC932-06|HLC-12291|652[0n]bp  
 Dendrochirus zebra|TZAIC542-06|HLC-11610|637[0n]bp  
 Dendrochirus zebra|TZAIC931-06|HLC-12290|652[0n]bp  
 Dendrochirus zebra|TZAIC011-05|HLC-TSZ-011|652[0n]bp  
 Dendrochirus zebra|TZAIC012-05|HLC-TSZ-012|652[0n]bp  
 Dendrochirus zebra|TZAIB670-06|HLC-13293|652[0n]bp  
 Dendrochirus zebra|TZAIB092-06|HLC-12203|652[1n]bp  
 Pterois andover|TZAIC501-06|HLC-11569|646[0n]bp  
 Pterois antennata|TZAIB589-06|HLC-13212|652[0n]bp  
 Pterois antennata|TZAIB895-07|HLC-15225|648[0n]bp  
 Pterois antennata|TZAIC443-05|HLC-11511|651[0n]bp

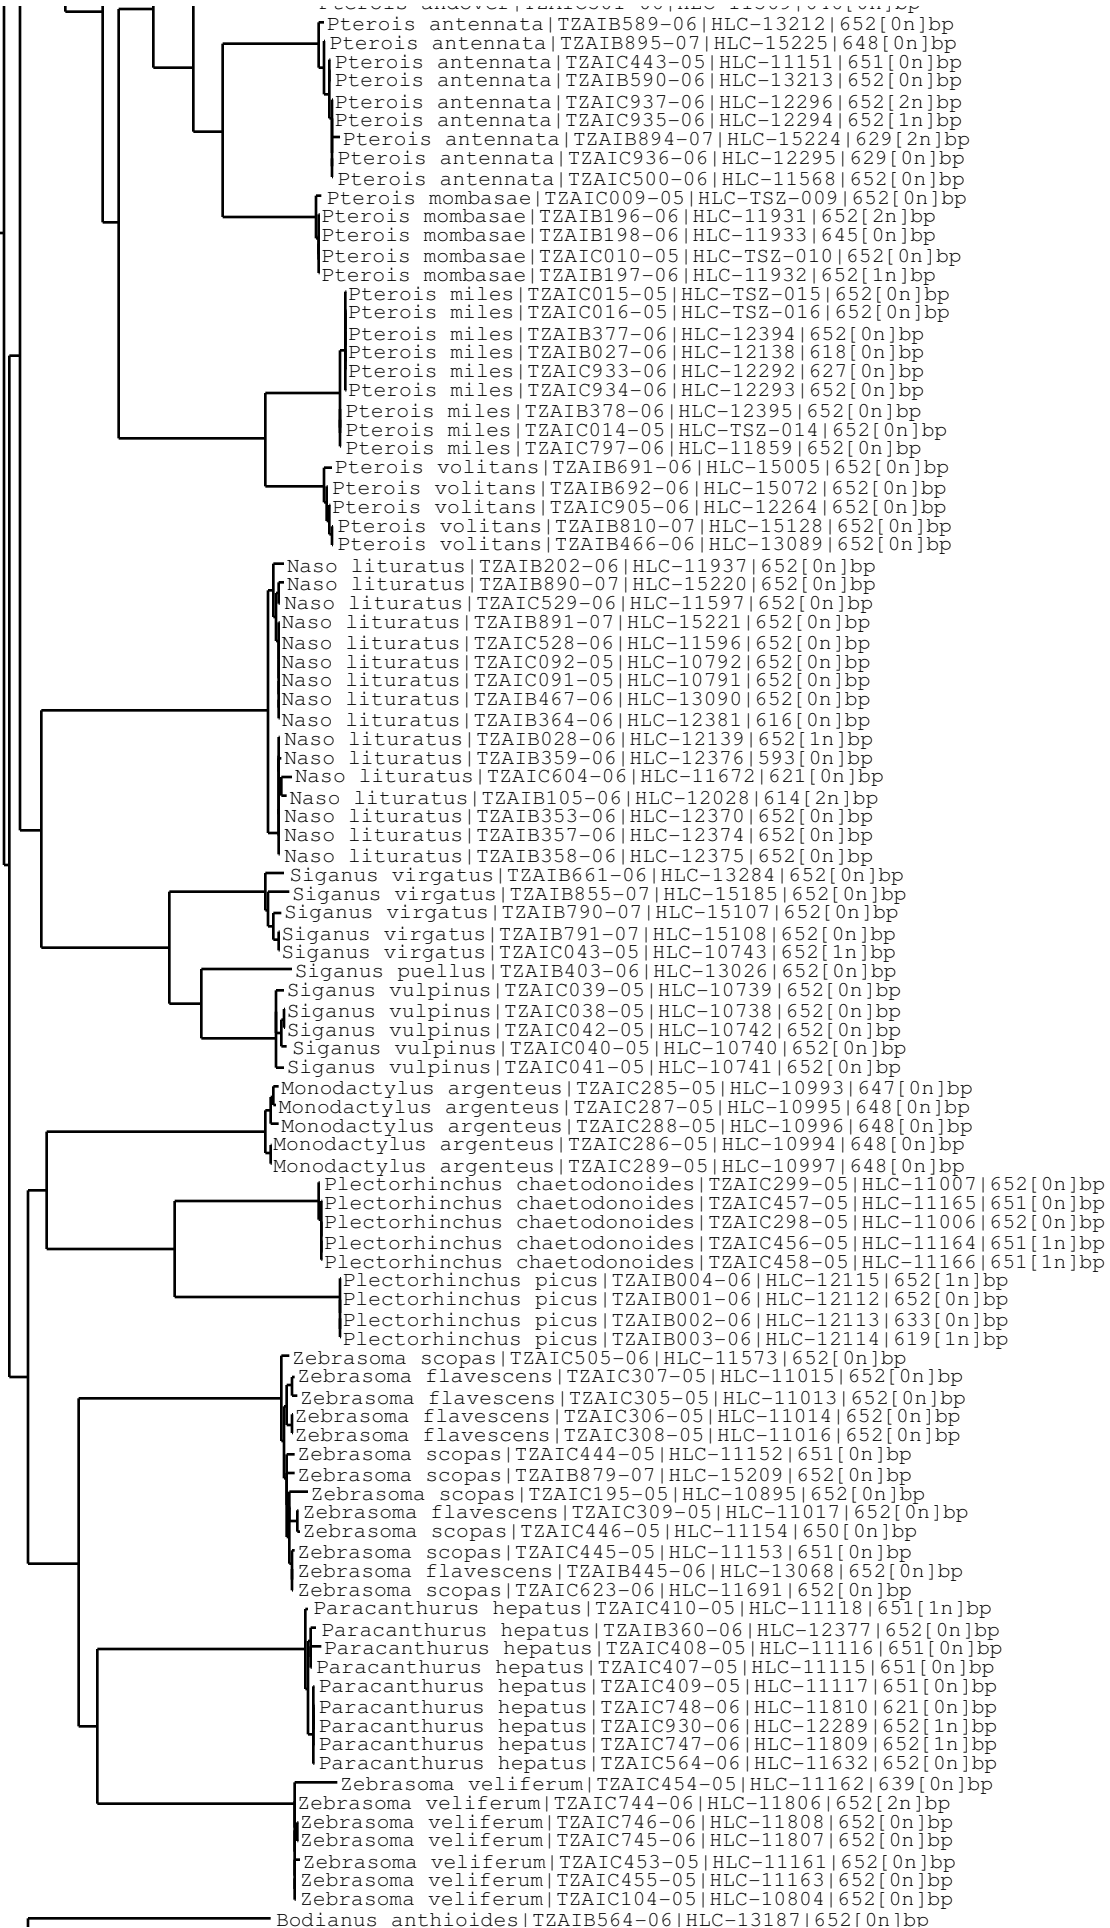

Bodianus anthioides|TZAIB564-06|HLC-13187|652[0n]bp

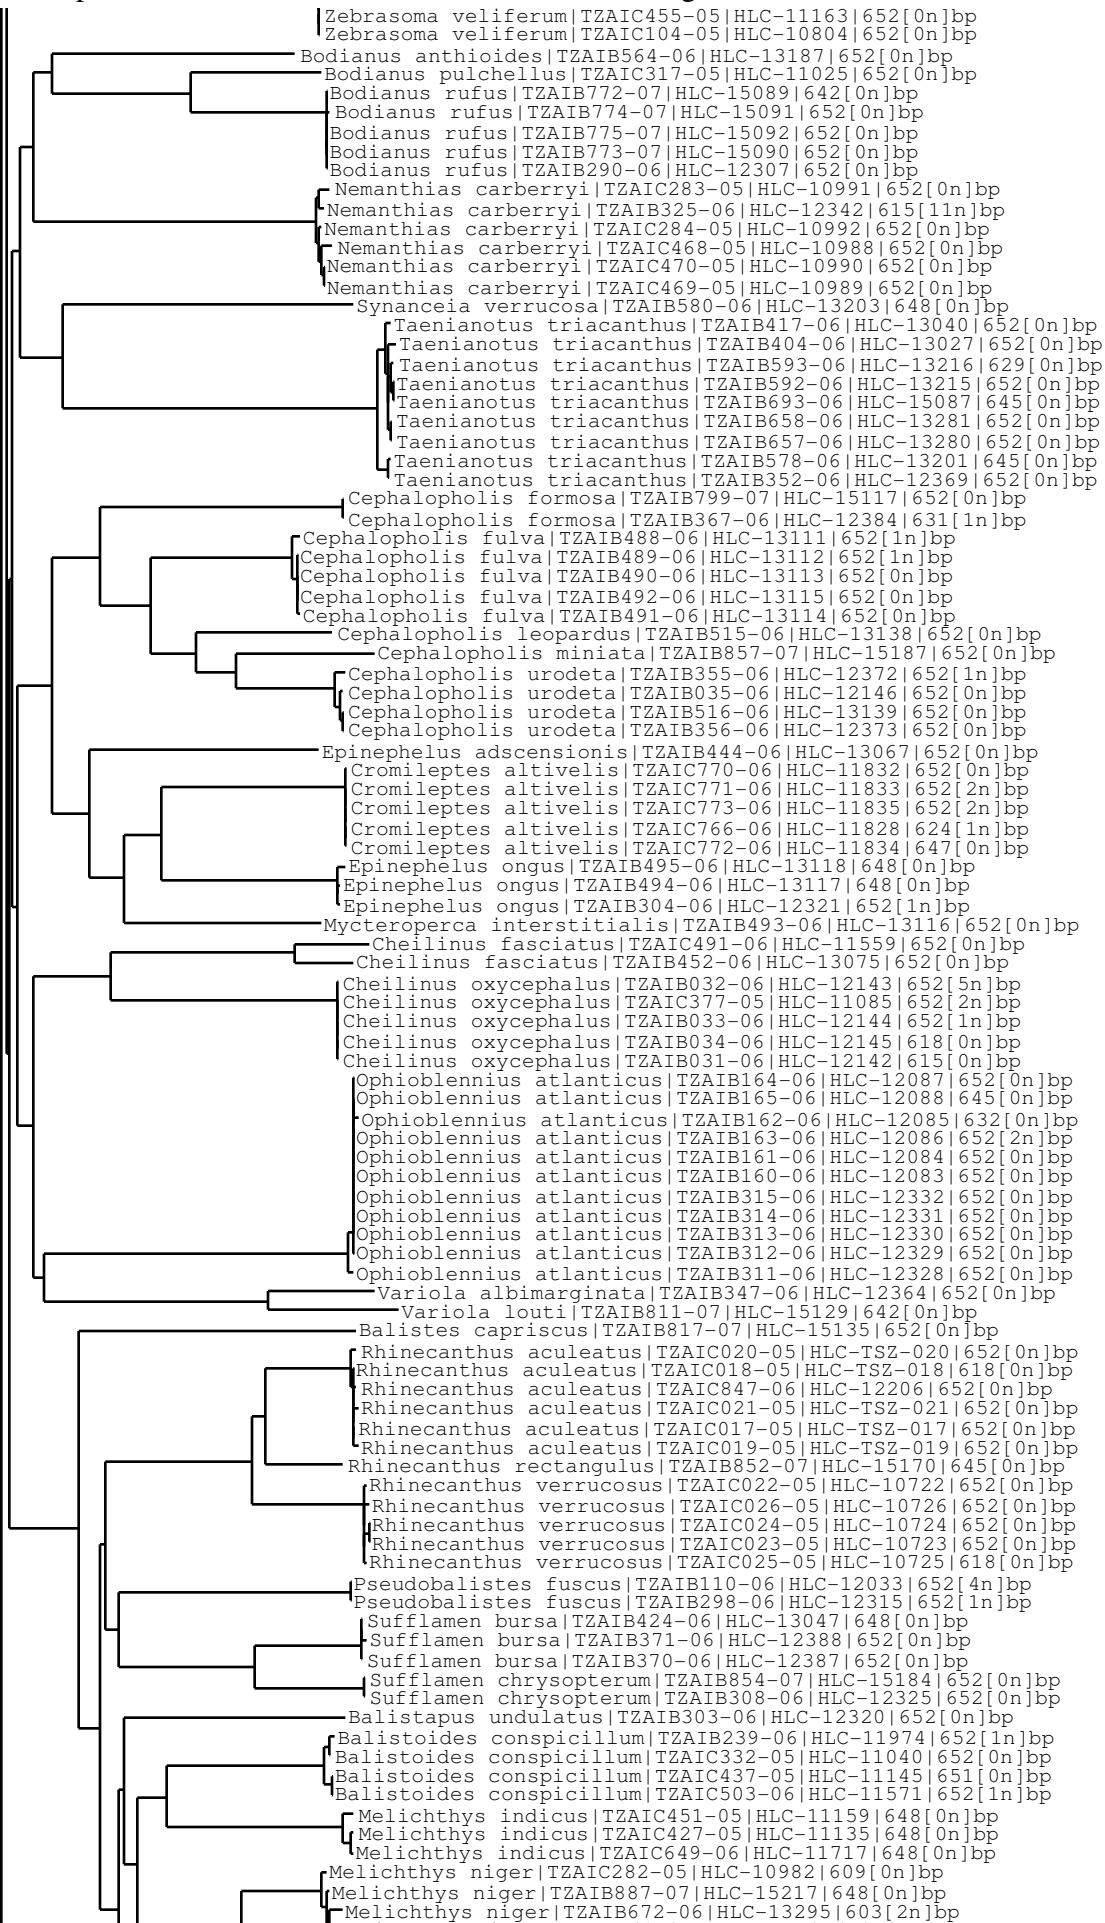



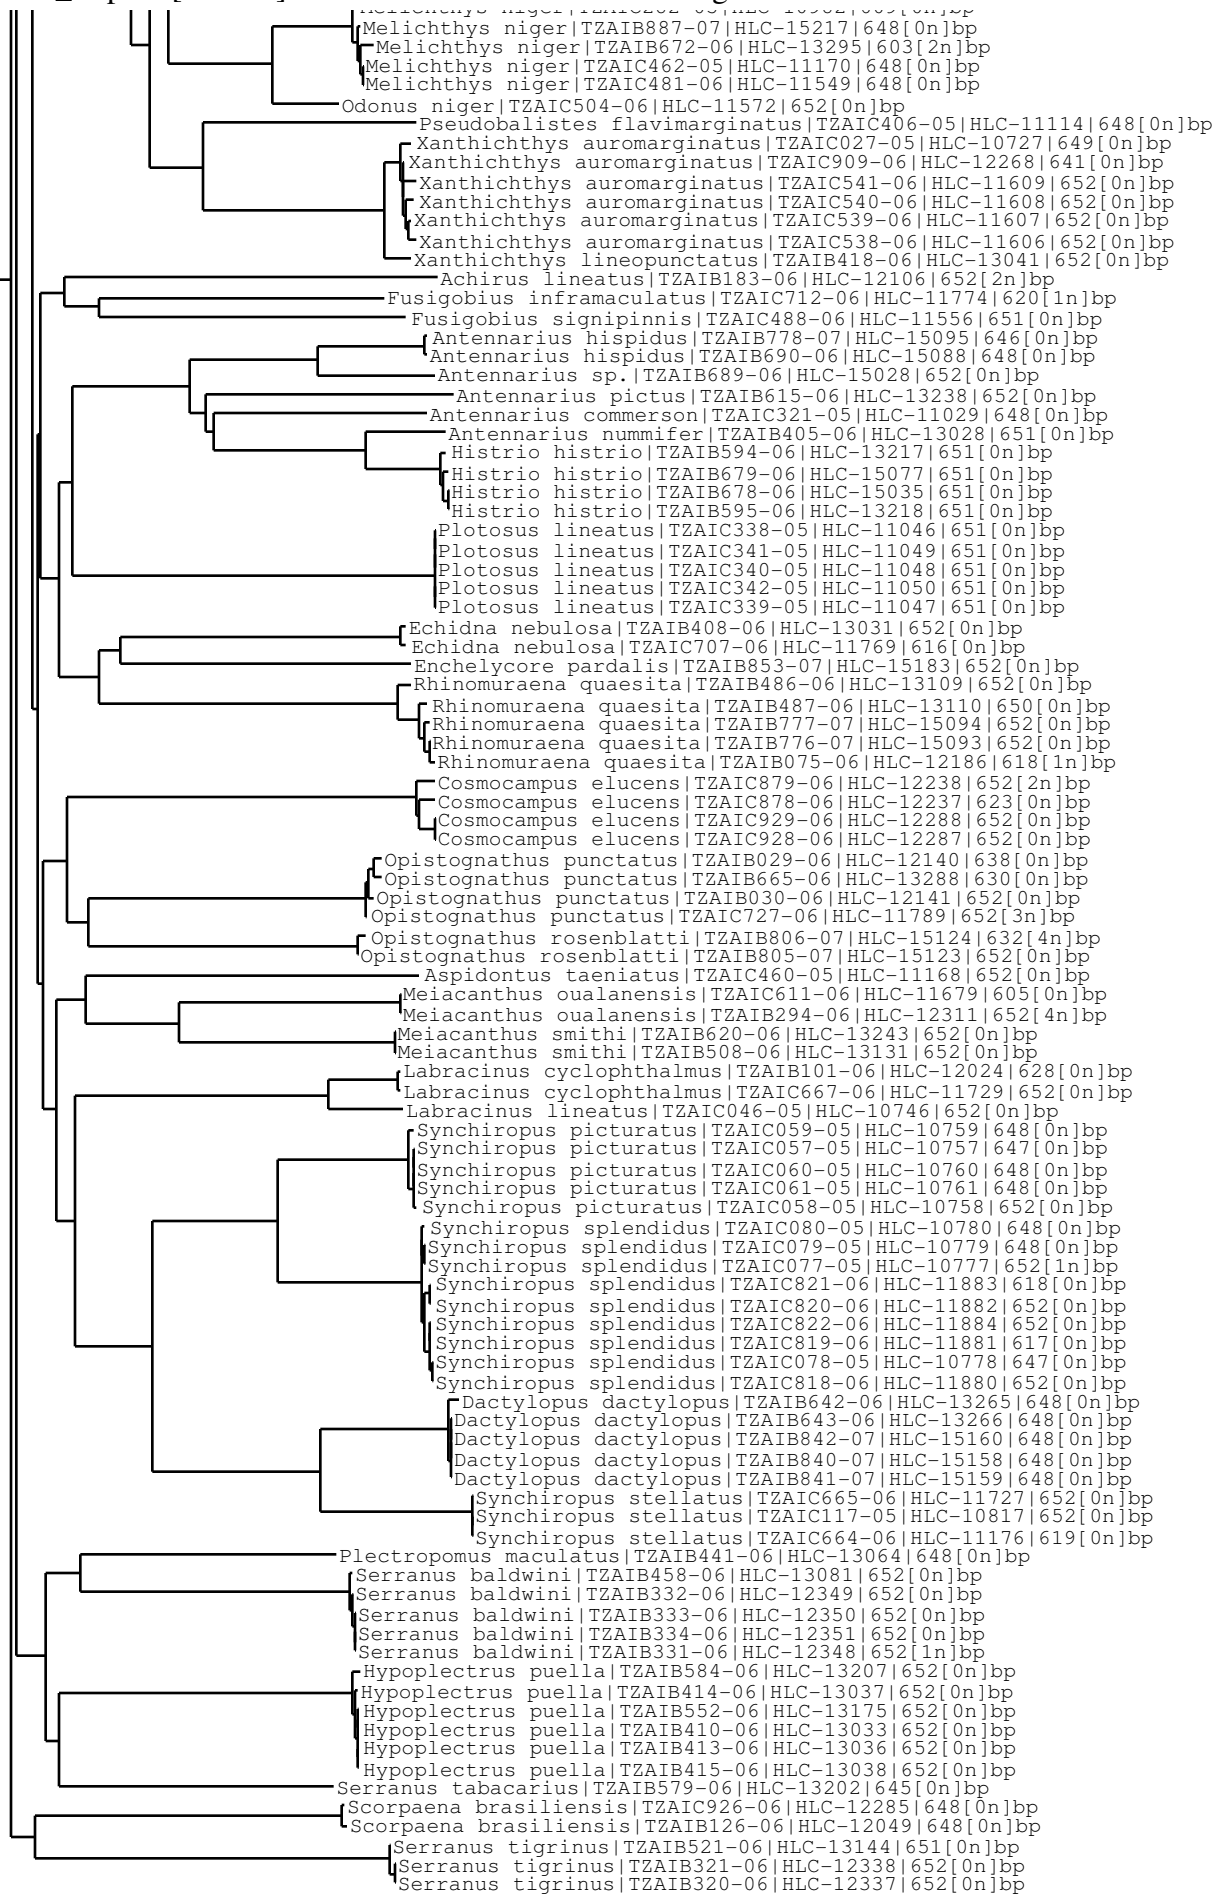

Supplement: pone.0006300.s002.pdf [file pone.0006300.s002.pdf]
