# Supplementary material for: Barcoding Nemo: DNA-Based Identifications for the Ornamental Fish Trade
Source: PubMed Central journal article supplement (PMC2708913; doi:10.1371/journal.pone.0006300), 2009-07-21
Supplement: pone.0006300.s001.pdf [file pone.0006300.s001.pdf]

|                            |                      |                                | Sample#   | BOLD #      | GenBank Acc# |
|----------------------------|----------------------|--------------------------------|-----------|-------------|--------------|
| Class Actinopterygii       |                      |                                |           |             |              |
| Division Teleostei         |                      |                                |           |             |              |
| Superorder Acanthopterygii |                      |                                |           |             |              |
| Order Beryciformes         |                      |                                |           |             |              |
|                            | Family Anomalopidae  | <i>Anomalops katoptron</i>     | HLC-12125 | TZAIB014-06 | FJ582850     |
|                            |                      |                                | HLC-12126 | TZAIB015-06 | FJ582851     |
|                            |                      |                                | HLC-12127 | TZAIB016-06 | FJ582852     |
|                            |                      |                                | HLC-12081 | TZAIB158-06 | FJ582853     |
|                            | Family Holocentridae | <i>Myripristis adusta</i>      | HLC-12134 | TZAIB023-06 | FJ583669     |
|                            |                      |                                | HLC-12057 | TZAIB134-06 | FJ583670     |
|                            |                      | <i>Myripristis jacobus</i>     | HLC-13058 | TZAIB435-06 | FJ583671     |
|                            |                      |                                | HLC-13059 | TZAIB436-06 | FJ583672     |
|                            |                      |                                | HLC-13060 | TZAIB437-06 | FJ583673     |
|                            |                      |                                | HLC-13061 | TZAIB438-06 | FJ583674     |
|                            |                      |                                | HLC-15132 | TZAIB814-07 | FJ583675     |
|                            |                      | <i>Myripristis murdjan</i>     | HLC-13190 | TZAIB567-06 | FJ583676     |
|                            |                      | <i>Myripristis violacea</i>    | HLC-13191 | TZAIB568-06 | FJ583677     |
| Order Perciformes          |                      |                                |           |             |              |
|                            | Family Acanthuridae  | <i>Acanthurus bahianus</i>     | HLC-12003 | TZAIB268-06 | FJ582652     |
|                            |                      |                                | HLC-11999 | TZAIB264-06 | FJ582653     |
|                            |                      |                                | HLC-12000 | TZAIB265-06 | FJ582654     |
|                            |                      |                                | HLC-12001 | TZAIB266-06 | FJ582655     |
|                            |                      |                                | HLC-12002 | TZAIB267-06 | FJ582656     |
|                            |                      | <i>Acanthurus chirurgus</i>    | HLC-12344 | TZAIB327-06 | FJ582657     |
|                            |                      | <i>Acanthurus coeruleus</i>    | HLC-11991 | TZAIB256-06 | FJ582658     |
|                            |                      |                                | HLC-11987 | TZAIB252-06 | FJ582659     |
|                            |                      |                                | HLC-11988 | TZAIB253-06 | FJ582660     |
|                            |                      |                                | HLC-11989 | TZAIB254-06 | FJ582661     |
|                            |                      |                                | HLC-11990 | TZAIB255-06 | FJ582662     |
|                            |                      | <i>Acanthurus japonicus</i>    | HLC-11132 | TZAIC424-05 | FJ582663     |
|                            |                      |                                | HLC-10936 | TZAIC236-05 | FJ582664     |
|                            |                      |                                | HLC-10938 | TZAIC238-05 | FJ582665     |
|                            |                      |                                | HLC-10937 | TZAIC237-05 | FJ582666     |
|                            |                      | <i>Acanthurus leucosternon</i> | HLC-11784 | TZAIC722-06 | FJ582667     |
|                            |                      |                                | HLC-11783 | TZAIC721-06 | FJ582668     |
|                            |                      |                                | HLC-11782 | TZAIC720-06 | FJ582669     |
|                            |                      |                                | HLC-11120 | TZAIC412-05 | FJ582670     |
|                            |                      |                                | HLC-10927 | TZAIC227-05 | FJ582671     |
|                            |                      | <i>Acanthurus lineatus</i>     | HLC-11871 | TZAIC809-06 | FJ582672     |
|                            |                      |                                | HLC-15125 | TZAIB807-07 | FJ582673     |
|                            |                      |                                | HLC-15126 | TZAIB808-07 | FJ582674     |
|                            |                      |                                | HLC-15127 | TZAIB809-07 | FJ582675     |
|                            |                      |                                | HLC-11872 | TZAIC810-06 | FJ582676     |
|                            |                      |                                | HLC-11613 | TZAIC545-06 | FJ582677     |
|                            |                      |                                | HLC-11612 | TZAIC544-06 | FJ582678     |
|                            |                      |                                | HLC-10806 | TZAIC106-05 | FJ582679     |
|                            |                      |                                | HLC-10805 | TZAIC105-05 | FJ582680     |
|                            |                      | <i>Acanthurus nigricans</i>    | HLC-12025 | TZAIB102-06 | FJ582681     |
|                            |                      |                                | HLC-12026 | TZAIB103-06 | FJ582682     |
|                            |                      |                                | HLC-12027 | TZAIB104-06 | FJ582683     |
|                            |                      | <i>Acanthurus nigrofuscus</i>  | HLC-13289 | TZAIB666-06 | FJ582684     |
|                            |                      |                                | HLC-13290 | TZAIB667-06 | FJ582685     |
|                            |                      |                                | HLC-13291 | TZAIB668-06 | FJ582686     |
|                            |                      | <i>Acanthurus pyroferus</i>    | HLC-13268 | TZAIB645-06 | FJ582687     |
|                            |                      |                                | HLC-11651 | TZAIC583-06 | FJ582688     |
|                            |                      |                                | HLC-11650 | TZAIC582-06 | FJ582689     |
|                            |                      |                                | HLC-10803 | TZAIC103-05 | FJ582690     |
|                            |                      | <i>Acanthurus sp.</i>          | HLC-11614 | TZAIC546-06 | FJ582691     |
|                            |                      | <i>Acanthurus tennentii</i>    | HLC-11618 | TZAIC550-06 | FJ582692     |
|                            |                      | <i>Acanthurus triostegus</i>   | HLC-11967 | TZAIB232-06 | FJ582693     |
|                            |                      |                                | HLC-11971 | TZAIB236-06 | FJ582694     |
|                            |                      |                                | HLC-11968 | TZAIB233-06 | FJ582695     |
|                            |                      |                                | HLC-11969 | TZAIB234-06 | FJ582696     |
|                            |                      |                                | HLC-11970 | TZAIB235-06 | FJ582697     |
|                            |                      |                                | HLC-10787 | TZAIC087-05 | FJ582698     |
|                            |                      |                                | HLC-10788 | TZAIC088-05 | FJ582699     |
|                            |                      |                                | HLC-10789 | TZAIC089-05 | FJ582700     |
|                            |                      |                                | HLC-11615 | TZAIC547-06 | FJ582701     |
|                            |                      | <i>Acanthurus xanthopterus</i> | HLC-11150 | TZAIC442-05 | FJ582702     |
|                            |                      | <i>Ctenochaetus striatus</i>   | HLC-13214 | TZAIB591-06 | FJ583302     |
|                            |                      |                                | HLC-11681 | TZAIC613-06 | FJ583303     |
|                            |                      |                                | HLC-11110 | TZAIC402-05 | FJ583304     |
|                            |                      | <i>Ctenochaetus strigosus</i>  | HLC-12365 | TZAIB348-06 | FJ583305     |
|                            |                      |                                | HLC-12366 | TZAIB349-06 | FJ583306     |
|                            |                      |                                | HLC-12009 | TZAIB274-06 | FJ583307     |
|                            |                      |                                | HLC-12010 | TZAIB275-06 | FJ583308     |
|                            |                      |                                | HLC-12011 | TZAIB276-06 | FJ583309     |
|                            |                      | <i>Naso lituratus</i>          | HLC-11672 | TZAIC604-06 | FJ583679     |

|                   |                                 |           |             |          |
|-------------------|---------------------------------|-----------|-------------|----------|
|                   |                                 | HLC-12376 | TZAIB359-06 | FJ583680 |
|                   |                                 | HLC-12370 | TZAIB353-06 | FJ583681 |
|                   |                                 | HLC-12374 | TZAIB357-06 | FJ583682 |
|                   |                                 | HLC-12375 | TZAIB358-06 | FJ583683 |
|                   |                                 | HLC-12381 | TZAIB364-06 | FJ583684 |
|                   |                                 | HLC-12028 | TZAIB105-06 | FJ583685 |
|                   |                                 | HLC-13090 | TZAIB467-06 | FJ583686 |
|                   |                                 | HLC-15220 | TZAIB890-07 | FJ583687 |
|                   |                                 | HLC-15221 | TZAIB891-07 | FJ583688 |
|                   |                                 | HLC-11937 | TZAIB202-06 | FJ583689 |
|                   |                                 | HLC-12139 | TZAIB028-06 | FJ583690 |
|                   |                                 | HLC-10792 | TZAIC092-05 | FJ583691 |
|                   |                                 | HLC-11597 | TZAIC529-06 | FJ583692 |
|                   |                                 | HLC-11596 | TZAIC528-06 | FJ583693 |
|                   |                                 | HLC-10791 | TZAIC091-05 | FJ583694 |
|                   | <i>Paracanthurus hepatus</i>    | HLC-11810 | TZAIC748-06 | FJ583801 |
|                   |                                 | HLC-12377 | TZAIB360-06 | FJ583802 |
|                   |                                 | HLC-12289 | TZAIC930-06 | FJ583803 |
|                   |                                 | HLC-11809 | TZAIC747-06 | FJ583804 |
|                   |                                 | HLC-11632 | TZAIC564-06 | FJ583805 |
|                   |                                 | HLC-11118 | TZAIC410-05 | FJ583806 |
|                   |                                 | HLC-11115 | TZAIC407-05 | FJ583807 |
|                   |                                 | HLC-11116 | TZAIC408-05 | FJ583808 |
|                   |                                 | HLC-11117 | TZAIC409-05 | FJ583809 |
|                   | <i>Zebrasoma flavescens</i>     | HLC-13068 | TZAIB445-06 | FJ584263 |
|                   |                                 | HLC-11013 | TZAIC305-05 | FJ584264 |
|                   |                                 | HLC-11015 | TZAIC307-05 | FJ584265 |
|                   |                                 | HLC-11017 | TZAIC309-05 | FJ584266 |
|                   |                                 | HLC-11014 | TZAIC306-05 | FJ584267 |
|                   |                                 | HLC-11016 | TZAIC308-05 | FJ584268 |
|                   | <i>Zebrasoma scopas</i>         | HLC-15209 | TZAIB879-07 | FJ584269 |
|                   |                                 | HLC-11691 | TZAIC623-06 | FJ584270 |
|                   |                                 | HLC-11573 | TZAIC505-06 | FJ584271 |
|                   |                                 | HLC-11152 | TZAIC444-05 | FJ584272 |
|                   |                                 | HLC-11154 | TZAIC446-05 | FJ584273 |
|                   |                                 | HLC-11153 | TZAIC445-05 | FJ584274 |
|                   |                                 | HLC-10895 | TZAIC195-05 | FJ584275 |
|                   | <i>Zebrasoma veliferum</i>      | HLC-11807 | TZAIC745-06 | FJ584276 |
|                   |                                 | HLC-10804 | TZAIC104-05 | FJ584277 |
|                   |                                 | HLC-11806 | TZAIC744-06 | FJ584278 |
|                   |                                 | HLC-11161 | TZAIC453-05 | FJ584279 |
|                   |                                 | HLC-11162 | TZAIC454-05 | FJ584280 |
|                   |                                 | HLC-11808 | TZAIC746-06 | FJ584281 |
|                   |                                 | HLC-11163 | TZAIC455-05 | FJ584282 |
| Family Apogonidae | <i>Apogon dovii</i>             | HLC-12347 | TZAIB330-06 | FJ582860 |
|                   | <i>Apogon maculatus</i>         | HLC-15133 | TZAIB815-07 | FJ582861 |
|                   |                                 | HLC-15066 | TZAIB680-06 | FJ582862 |
|                   | <i>Apogon sealei</i>            | HLC-13192 | TZAIB569-06 | FJ582863 |
|                   |                                 | HLC-13193 | TZAIB570-06 | FJ582864 |
|                   |                                 | HLC-13195 | TZAIB572-06 | FJ582865 |
|                   |                                 | HLC-13196 | TZAIB573-06 | FJ582866 |
|                   | <i>Apogon townsendi</i>         | HLC-15134 | TZAIB816-07 | FJ582867 |
|                   | <i>Pterapogon kauderni</i>      | HLC-10728 | TZAIC028-05 | FJ583995 |
|                   |                                 | HLC-10732 | TZAIC032-05 | FJ583996 |
|                   |                                 | HLC-10729 | TZAIC029-05 | FJ583997 |
|                   |                                 | HLC-10730 | TZAIC030-05 | FJ583998 |
|                   |                                 | HLC-10731 | TZAIC031-05 | FJ583999 |
|                   | <i>Rhabdamia gracilis</i>       | HLC-15141 | TZAIB823-07 | FJ584049 |
|                   |                                 | HLC-15145 | TZAIB827-07 | FJ584050 |
|                   |                                 | HLC-15143 | TZAIB825-07 | FJ584051 |
|                   |                                 | HLC-15144 | TZAIB826-07 | FJ584052 |
|                   |                                 | HLC-15142 | TZAIB824-07 | FJ584053 |
|                   | <i>Sphaeramia nematoptera</i>   | HLC-10734 | TZAIC034-05 | FJ584119 |
|                   |                                 | HLC-10735 | TZAIC035-05 | FJ584120 |
|                   |                                 | HLC-10737 | TZAIC037-05 | FJ584121 |
|                   |                                 | HLC-10733 | TZAIC033-05 | FJ584122 |
|                   |                                 | HLC-10736 | TZAIC036-05 | FJ584123 |
| Family Blenniidae | <i>Aspidontus taeniatus</i>     | HLC-11168 | TZAIC460-05 | FJ582891 |
|                   | <i>Ecsenius bicolor</i>         | HLC-12039 | TZAIB116-06 | FJ583381 |
|                   |                                 | HLC-12040 | TZAIB117-06 | FJ583382 |
|                   |                                 | HLC-12208 | TZAIC849-06 | FJ583383 |
|                   | <i>Istiblennius edentulus</i>   | HLC-11622 | TZAIC554-06 | FJ583583 |
|                   | <i>Meiacanthus ovalanensis</i>  | HLC-11679 | TZAIC611-06 | FJ583647 |
|                   |                                 | HLC-12311 | TZAIB294-06 | FJ583648 |
|                   | <i>Meiacanthus smithi</i>       | HLC-13243 | TZAIB620-06 | FJ583649 |
|                   |                                 | HLC-13131 | TZAIB508-06 | FJ583650 |
|                   | <i>Ophioblennius atlanticus</i> | HLC-12088 | TZAIB165-06 | FJ583745 |
|                   |                                 | HLC-12085 | TZAIB162-06 | FJ583746 |
|                   |                                 | HLC-12328 | TZAIB311-06 | FJ583747 |

|                       |                               |           |             |          |
|-----------------------|-------------------------------|-----------|-------------|----------|
|                       |                               | HLC-12329 | TZAIB312-06 | FJ583748 |
|                       |                               | HLC-12330 | TZAIB313-06 | FJ583749 |
|                       |                               | HLC-12331 | TZAIB314-06 | FJ583750 |
|                       |                               | HLC-12332 | TZAIB315-06 | FJ583751 |
|                       |                               | HLC-12083 | TZAIB160-06 | FJ583752 |
|                       |                               | HLC-12084 | TZAIB161-06 | FJ583753 |
|                       |                               | HLC-12086 | TZAIB163-06 | FJ583754 |
|                       |                               | HLC-12087 | TZAIB164-06 | FJ583755 |
|                       | <i>Salarias fasciatus</i>     | HLC-10977 | TZAIC277-05 | FJ584071 |
|                       |                               | HLC-10976 | TZAIC276-05 | FJ584072 |
|                       |                               | HLC-11736 | TZAIC674-06 | FJ584073 |
|                       |                               | HLC-11735 | TZAIC673-06 | FJ584074 |
|                       |                               | HLC-11734 | TZAIC672-06 | FJ584075 |
|                       |                               | HLC-11733 | TZAIC671-06 | FJ584076 |
|                       |                               | HLC-10886 | TZAIC186-05 | FJ584077 |
|                       |                               | HLC-10975 | TZAIC275-05 | FJ584078 |
|                       |                               | HLC-10974 | TZAIC274-05 | FJ584079 |
|                       |                               | HLC-10973 | TZAIC273-05 | FJ584080 |
| Family Callionymidae  | <i>Dactylopus dactylopus</i>  | HLC-13266 | TZAIB643-06 | FJ583316 |
|                       |                               | HLC-13265 | TZAIB642-06 | FJ583317 |
|                       |                               | HLC-15158 | TZAIB840-07 | FJ583318 |
|                       |                               | HLC-15159 | TZAIB841-07 | FJ583319 |
|                       |                               | HLC-15160 | TZAIB842-07 | FJ583320 |
|                       | <i>Synchiropus picturatus</i> | HLC-10760 | TZAIC060-05 | FJ584137 |
|                       |                               | HLC-10761 | TZAIC061-05 | FJ584138 |
|                       |                               | HLC-10759 | TZAIC059-05 | FJ584139 |
|                       |                               | HLC-10757 | TZAIC057-05 | FJ584140 |
|                       |                               | HLC-10758 | TZAIC058-05 | FJ584141 |
|                       | <i>Synchiropus splendidus</i> | HLC-10780 | TZAIC080-05 | FJ584142 |
|                       |                               | HLC-10779 | TZAIC079-05 | FJ584143 |
|                       |                               | HLC-10778 | TZAIC078-05 | FJ584144 |
|                       |                               | HLC-11884 | TZAIC822-06 | FJ584145 |
|                       |                               | HLC-11883 | TZAIC821-06 | FJ584146 |
|                       |                               | HLC-11882 | TZAIC820-06 | FJ584147 |
|                       |                               | HLC-11881 | TZAIC819-06 | FJ584148 |
|                       |                               | HLC-11880 | TZAIC818-06 | FJ584149 |
|                       |                               | HLC-10777 | TZAIC077-05 | FJ584150 |
|                       | <i>Synchiropus stellatus</i>  | HLC-11727 | TZAIC665-06 | FJ584151 |
|                       |                               | HLC-11176 | TZAIC664-06 | FJ584152 |
|                       |                               | HLC-10817 | TZAIC117-05 | FJ584153 |
| Family Carangidae     | <i>Selene vomer</i>           | HLC-15113 | TZAIB796-07 | FJ584093 |
| Family Chaenopsidae   | <i>Emblemaria pandionis</i>   | HLC-13082 | TZAIB459-06 | FJ583394 |
| Family Chaetodontidae | <i>Chaetodon animaculatus</i> | HLC-13182 | TZAIB559-06 | FJ583017 |
|                       | <i>Chaetodon argentatus</i>   | HLC-13185 | TZAIB562-06 | FJ583018 |
|                       |                               | HLC-13186 | TZAIB563-06 | FJ583019 |
|                       |                               | HLC-13184 | TZAIB561-06 | FJ583020 |
|                       | <i>Chaetodon auriga</i>       | HLC-13273 | TZAIB650-06 | FJ583021 |
|                       |                               | HLC-15060 | TZAIB697-06 | FJ583022 |
|                       |                               | HLC-15061 | TZAIB698-06 | FJ583023 |
|                       |                               | HLC-15062 | TZAIB699-06 | FJ583024 |
|                       |                               | HLC-15063 | TZAIB700-06 | FJ583025 |
|                       |                               | HLC-10951 | TZAIC251-05 | FJ583026 |
|                       | <i>Chaetodon auripes</i>      | HLC-15008 | TZAIB701-06 | FJ583027 |
|                       |                               | HLC-15009 | TZAIB702-06 | FJ583028 |
|                       |                               | HLC-15011 | TZAIB703-06 | FJ583029 |
|                       |                               | HLC-15012 | TZAIB704-06 | FJ583030 |
|                       | <i>Chaetodon burgessi</i>     | HLC-11790 | TZAIC728-06 | FJ583031 |
|                       | <i>Chaetodon capistratus</i>  | HLC-12335 | TZAIB318-06 | FJ583032 |
|                       |                               | HLC-13282 | TZAIB659-06 | FJ583033 |
|                       |                               | HLC-13283 | TZAIB660-06 | FJ583034 |
|                       |                               | HLC-13129 | TZAIB506-06 | FJ583035 |
|                       |                               | HLC-15131 | TZAIB813-07 | FJ583036 |
|                       | <i>Chaetodon collare</i>      | HLC-12378 | TZAIB361-06 | FJ583037 |
|                       |                               | HLC-12379 | TZAIB362-06 | FJ583038 |
|                       |                               | HLC-12380 | TZAIB363-06 | FJ583039 |
|                       |                               | HLC-11171 | TZAIC659-06 | FJ583040 |
|                       |                               | HLC-11722 | TZAIC654-06 | FJ583041 |
|                       |                               | HLC-11785 | TZAIC723-06 | FJ583042 |
|                       |                               | HLC-11067 | TZAIC359-05 | FJ583043 |
|                       |                               | HLC-11068 | TZAIC360-05 | FJ583044 |
|                       | <i>Chaetodon decussatus</i>   | HLC-10800 | TZAIC100-05 | FJ583045 |
|                       |                               | HLC-12279 | TZAIC920-06 | FJ583046 |
|                       |                               | HLC-12278 | TZAIC919-06 | FJ583047 |
|                       |                               | HLC-11649 | TZAIC581-06 | FJ583048 |
|                       |                               | HLC-11648 | TZAIC580-06 | FJ583049 |
|                       |                               | HLC-11646 | TZAIC578-06 | FJ583050 |
|                       | <i>Chaetodon ephippium</i>    | HLC-10950 | TZAIC250-05 | FJ583051 |
|                       |                               | HLC-15002 | TZAIB705-06 | FJ583052 |
|                       | <i>Chaetodon flavirostris</i> | HLC-11716 | TZAIC648-06 | FJ583053 |

|                                    |           |             |          |
|------------------------------------|-----------|-------------|----------|
| <i>Chaetodon kleinii</i>           | HLC-12017 | TZAIB282-06 | FJ583054 |
| <i>Chaetodon lunula</i>            | HLC-15218 | TZAIB888-07 | FJ583055 |
|                                    | HLC-15219 | TZAIB889-07 | FJ583056 |
|                                    | HLC-11124 | TZAIC416-05 | FJ583057 |
|                                    | HLC-10939 | TZAIC239-05 | FJ583058 |
|                                    | HLC-10941 | TZAIC241-05 | FJ583059 |
|                                    | HLC-10940 | TZAIC240-05 | FJ583060 |
| <i>Chaetodon lunulatus</i>         | HLC-13032 | TZAIB409-06 | FJ583061 |
|                                    | HLC-13039 | TZAIB416-06 | FJ583062 |
| <i>Chaetodon meyeri</i>            | HLC-11936 | TZAIB201-06 | FJ583063 |
|                                    | HLC-11870 | TZAIC808-06 | FJ583064 |
|                                    | HLC-11654 | TZAIC586-06 | FJ583065 |
| <i>Chaetodon multicinctus</i>      | HLC-12079 | TZAIB156-06 | FJ583066 |
|                                    | HLC-11111 | TZAIC403-05 | FJ583067 |
| <i>Chaetodon ocellatus</i>         | HLC-13206 | TZAIB583-06 | FJ583068 |
| <i>Chaetodon ocellicaudus</i>      | HLC-15086 | TZAIB707-06 | FJ583069 |
| <i>Chaetodon ornatissimus</i>      | HLC-12346 | TZAIB329-06 | FJ583070 |
|                                    | HLC-13147 | TZAIB524-06 | FJ583071 |
| <i>Chaetodon punctatofasciatus</i> | HLC-15169 | TZAIB851-07 | FJ583072 |
|                                    | HLC-12271 | TZAIC912-06 | FJ583073 |
|                                    | HLC-11630 | TZAIC562-06 | FJ583074 |
| <i>Chaetodon quadrimaculatus</i>   | HLC-13269 | TZAIB646-06 | FJ583075 |
|                                    | HLC-13250 | TZAIB627-06 | FJ583076 |
| <i>Chaetodon rafflesii</i>         | HLC-13225 | TZAIB602-06 | FJ583077 |
|                                    | HLC-13226 | TZAIB603-06 | FJ583078 |
|                                    | HLC-13227 | TZAIB604-06 | FJ583079 |
|                                    | HLC-13228 | TZAIB605-06 | FJ583080 |
|                                    | HLC-13229 | TZAIB606-06 | FJ583081 |
|                                    | HLC-11652 | TZAIC584-06 | FJ583082 |
| <i>Chaetodon semeion</i>           | HLC-11906 | TZAIC844-06 | FJ583083 |
| <i>Chaetodon speculum</i>          | HLC-13065 | TZAIB442-06 | FJ583084 |
| <i>Chaetodon striatus</i>          | HLC-12326 | TZAIB309-06 | FJ583085 |
|                                    | HLC-12327 | TZAIB310-06 | FJ583086 |
|                                    | HLC-13285 | TZAIB662-06 | FJ583087 |
|                                    | HLC-13286 | TZAIB663-06 | FJ583088 |
|                                    | HLC-13287 | TZAIB664-06 | FJ583089 |
| <i>Chaetodon ulietensis</i>        | HLC-13197 | TZAIB574-06 | FJ583101 |
|                                    | HLC-11096 | TZAIC388-05 | FJ583102 |
| <i>Chaetodon vagabundus</i>        | HLC-13270 | TZAIB647-06 | FJ583103 |
|                                    | HLC-13271 | TZAIB648-06 | FJ583104 |
|                                    | HLC-11893 | TZAIC831-06 | FJ583105 |
|                                    | HLC-11779 | TZAIC717-06 | FJ583106 |
|                                    | HLC-11778 | TZAIC716-06 | FJ583107 |
|                                    | HLC-11777 | TZAIC715-06 | FJ583108 |
|                                    | HLC-11647 | TZAIC579-06 | FJ583109 |
| <i>Chaetodon wiebeli</i>           | HLC-13029 | TZAIB406-06 | FJ583110 |
| <i>Chaetodon xanthurus</i>         | HLC-13091 | TZAIB468-06 | FJ583111 |
|                                    | HLC-13092 | TZAIB469-06 | FJ583112 |
|                                    | HLC-15001 | TZAIB708-06 | FJ583113 |
|                                    | HLC-11892 | TZAIC830-06 | FJ583114 |
|                                    | HLC-11675 | TZAIC607-06 | FJ583115 |
|                                    | HLC-11674 | TZAIC606-06 | FJ583116 |
|                                    | HLC-11673 | TZAIC605-06 | FJ583117 |
|                                    | HLC-10949 | TZAIC249-05 | FJ583118 |
| <i>Chelmon rostratus</i>           | HLC-13042 | TZAIB419-06 | FJ583126 |
|                                    | HLC-13043 | TZAIB420-06 | FJ583127 |
|                                    | HLC-13167 | TZAIB544-06 | FJ583128 |
|                                    | HLC-13168 | TZAIB545-06 | FJ583129 |
|                                    | HLC-13169 | TZAIB546-06 | FJ583130 |
|                                    | HLC-11847 | TZAIC785-06 | FJ583131 |
|                                    | HLC-11845 | TZAIC783-06 | FJ583132 |
|                                    | HLC-11844 | TZAIC782-06 | FJ583133 |
|                                    | HLC-11843 | TZAIC781-06 | FJ583134 |
| <i>Forcipiger flavissimus</i>      | HLC-15064 | TZAIB709-06 | FJ583405 |
|                                    | HLC-15065 | TZAIB710-06 | FJ583406 |
|                                    | HLC-13164 | TZAIB541-06 | FJ583407 |
|                                    | HLC-11796 | TZAIC734-06 | FJ583408 |
|                                    | HLC-11795 | TZAIC733-06 | FJ583409 |
|                                    | HLC-11565 | TZAIC497-06 | FJ583410 |
|                                    | HLC-11097 | TZAIC389-05 | FJ583411 |
|                                    | HLC-11098 | TZAIC390-05 | FJ583412 |
| <i>Hemitaurchithys polylepis</i>   | HLC-12382 | TZAIB365-06 | FJ583536 |
|                                    | HLC-13146 | TZAIB523-06 | FJ583537 |
|                                    | HLC-13258 | TZAIB635-06 | FJ583538 |
| <i>Heniochus acuminatus</i>        | HLC-12308 | TZAIB291-06 | FJ583539 |
|                                    | HLC-15120 | TZAIB802-07 | FJ583540 |
|                                    | HLC-15121 | TZAIB803-07 | FJ583541 |
| <i>Heniochus chryostomus</i>       | HLC-11885 | TZAIC823-06 | FJ583542 |
|                                    | HLC-11791 | TZAIC729-06 | FJ583543 |

|                    |                                    |           |             |          |
|--------------------|------------------------------------|-----------|-------------|----------|
|                    | <i>Heniochus diphreutes</i>        | HLC-11838 | TZAIC776-06 | FJ583544 |
|                    |                                    | HLC-12309 | TZAIB292-06 | FJ583545 |
|                    |                                    | HLC-13247 | TZAIB624-06 | FJ583546 |
|                    | <i>Heniochus singularis</i>        | HLC-13093 | TZAIB470-06 | FJ583547 |
|                    | <i>Heniochus varius</i>            | HLC-11768 | TZAIC706-06 | FJ583548 |
|                    |                                    | HLC-11767 | TZAIC705-06 | FJ583549 |
| Family Cirrhitidae | <i>Amblycirrhitus pinos</i>        | HLC-12147 | TZAIB036-06 | FJ582704 |
|                    |                                    | HLC-12148 | TZAIB037-06 | FJ582705 |
|                    | <i>Cirrhitichthys falco</i>        | HLC-11897 | TZAIC835-06 | FJ583250 |
|                    |                                    | HLC-15207 | TZAIB877-07 | FJ583251 |
|                    |                                    | HLC-15097 | TZAIB780-07 | FJ583252 |
|                    |                                    | HLC-15098 | TZAIB781-07 | FJ583253 |
|                    |                                    | HLC-11899 | TZAIC837-06 | FJ583254 |
|                    |                                    | HLC-11898 | TZAIC836-06 | FJ583255 |
|                    |                                    | HLC-11896 | TZAIC834-06 | FJ583256 |
|                    | <i>Cirrhitops fasciatus</i>        | HLC-12324 | TZAIB307-06 | FJ583257 |
|                    | <i>Neocirrhites armatus</i>        | HLC-13126 | TZAIB503-06 | FJ583715 |
|                    |                                    | HLC-13124 | TZAIB501-06 | FJ583716 |
|                    |                                    | HLC-13125 | TZAIB502-06 | FJ583717 |
|                    |                                    | HLC-13128 | TZAIB505-06 | FJ583718 |
|                    |                                    | HLC-11757 | TZAIC695-06 | FJ583719 |
|                    |                                    | HLC-11756 | TZAIC694-06 | FJ583720 |
|                    |                                    | HLC-11755 | TZAIC693-06 | FJ583721 |
|                    |                                    | HLC-10878 | TZAIC178-05 | FJ583722 |
|                    |                                    | HLC-10877 | TZAIC177-05 | FJ583723 |
|                    | <i>Oxycirrhites typus</i>          | HLC-11574 | TZAIC506-06 | FJ583791 |
|                    |                                    | HLC-10745 | TZAIC045-05 | FJ583792 |
|                    |                                    | HLC-10744 | TZAIC044-05 | FJ583793 |
|                    |                                    | HLC-10887 | TZAIC187-05 | FJ583794 |
|                    |                                    | HLC-10888 | TZAIC188-05 | FJ583795 |
|                    | <i>Paracirrhites arcatus</i>       | HLC-12066 | TZAIB143-06 | FJ583821 |
|                    |                                    | HLC-12067 | TZAIB144-06 | FJ583822 |
|                    |                                    | HLC-12068 | TZAIB145-06 | FJ583823 |
|                    |                                    | HLC-12069 | TZAIB146-06 | FJ583824 |
|                    |                                    | HLC-12070 | TZAIB147-06 | FJ583825 |
|                    |                                    | HLC-15197 | TZAIB867-07 | FJ583826 |
| Family Echeneidae  | <i>Echeneis naucrates</i>          | HLC-13267 | TZAIB644-06 | FJ583378 |
| Family Ephippidae  | <i>Chaetodipterus faber</i>        | HLC-13080 | TZAIB457-06 | FJ583016 |
|                    | <i>Platax orbicularis</i>          | HLC-12071 | TZAIB148-06 | FJ583852 |
|                    |                                    | HLC-13157 | TZAIB534-06 | FJ583853 |
|                    |                                    | HLC-13158 | TZAIB535-06 | FJ583854 |
|                    |                                    | HLC-13159 | TZAIB536-06 | FJ583855 |
|                    |                                    | HLC-13160 | TZAIB537-06 | FJ583856 |
|                    | <i>Platax pinnatus</i>             | HLC-15122 | TZAIB804-07 | FJ583857 |
|                    |                                    | HLC-11005 | TZAIC297-05 | FJ583858 |
|                    | <i>Platax teira</i>                | HLC-13161 | TZAIB538-06 | FJ583859 |
| Family Gobiidae    | <i>Amblyeleotris guttata</i>       | HLC-13260 | TZAIB637-06 | FJ582706 |
|                    |                                    | HLC-13261 | TZAIB638-06 | FJ582707 |
|                    |                                    | HLC-13262 | TZAIB639-06 | FJ582708 |
|                    |                                    | HLC-13263 | TZAIB640-06 | FJ582709 |
|                    |                                    | HLC-13264 | TZAIB641-06 | FJ582710 |
|                    | <i>Amblyeleotris steinitzi</i>     | HLC-13176 | TZAIB553-06 | FJ582711 |
|                    |                                    | HLC-13178 | TZAIB555-06 | FJ582712 |
|                    | <i>Amblyeleotris sungami</i>       | HLC-12043 | TZAIB120-06 | FJ582713 |
|                    |                                    | HLC-12044 | TZAIB121-06 | FJ582714 |
|                    |                                    | HLC-12045 | TZAIB122-06 | FJ582715 |
|                    |                                    | HLC-12046 | TZAIB123-06 | FJ582716 |
|                    | <i>Amblyeleotris wheeleri</i>      | HLC-12301 | TZAIB284-06 | FJ582717 |
|                    |                                    | HLC-13204 | TZAIB581-06 | FJ582718 |
|                    | <i>Amblygobius decussatus</i>      | HLC-13096 | TZAIB473-06 | FJ582719 |
|                    |                                    | HLC-13198 | TZAIB575-06 | FJ582720 |
|                    |                                    | HLC-13199 | TZAIB576-06 | FJ582721 |
|                    |                                    | HLC-11158 | TZAIC450-05 | FJ582722 |
|                    |                                    | HLC-10978 | TZAIC278-05 | FJ582723 |
|                    | <i>Amblygobius phalaena</i>        | HLC-13170 | TZAIB547-06 | FJ582724 |
|                    |                                    | HLC-13171 | TZAIB548-06 | FJ582725 |
|                    | <i>Cryptocentrus cinctus</i>       | HLC-10979 | TZAIC279-05 | FJ583280 |
|                    |                                    | HLC-11543 | TZAIC475-06 | FJ583281 |
|                    |                                    | HLC-11542 | TZAIC474-06 | FJ583282 |
|                    |                                    | HLC-11540 | TZAIC472-06 | FJ583283 |
|                    |                                    | HLC-10890 | TZAIC190-05 | FJ583284 |
|                    |                                    | HLC-10892 | TZAIC192-05 | FJ583285 |
|                    | <i>Cryptocentrus cyanotaenia</i>   | HLC-12191 | TZAIB080-06 | FJ583286 |
|                    | <i>Cryptocentrus leptocephalus</i> | HLC-11900 | TZAIC838-06 | FJ583287 |
|                    |                                    | HLC-11903 | TZAIC841-06 | FJ583288 |
|                    |                                    | HLC-11901 | TZAIC839-06 | FJ583289 |
|                    |                                    | HLC-12262 | TZAIC903-06 | FJ583290 |
|                    |                                    | HLC-12261 | TZAIC902-06 | FJ583291 |
|                    |                                    | HLC-12260 | TZAIC901-06 | FJ583292 |

|                                   |           |             |          |
|-----------------------------------|-----------|-------------|----------|
|                                   | HLC-12259 | TZAIC900-06 | FJ583293 |
|                                   | HLC-12258 | TZAIC899-06 | FJ583294 |
|                                   | HLC-11902 | TZAIC840-06 | FJ583295 |
|                                   | HLC-10980 | TZAIC280-05 | FJ583296 |
| <i>Cryptocentrus pavoninoides</i> | HLC-12277 | TZAIC918-06 | FJ583297 |
|                                   | HLC-12276 | TZAIC917-06 | FJ583298 |
|                                   | HLC-12275 | TZAIC916-06 | FJ583299 |
|                                   | HLC-12274 | TZAIC915-06 | FJ583300 |
|                                   | HLC-12273 | TZAIC914-06 | FJ583301 |
| <i>Ctenogobiops tangaroai</i>     | HLC-15227 | TZAIB897-07 | FJ583310 |
| <i>Elacatinus evelynae</i>        | HLC-10781 | TZAIC081-05 | FJ583384 |
|                                   | HLC-15083 | TZAIB713-06 | FJ583385 |
|                                   | HLC-15084 | TZAIB714-06 | FJ583386 |
|                                   | HLC-15114 | TZAIB797-07 | FJ583387 |
|                                   | HLC-15115 | TZAIB798-07 | FJ583388 |
| <i>Elacatinus oceanops</i>        | HLC-13153 | TZAIB530-06 | FJ583389 |
|                                   | HLC-13154 | TZAIB531-06 | FJ583390 |
|                                   | HLC-13155 | TZAIB532-06 | FJ583391 |
|                                   | HLC-15006 | TZAIB711-06 | FJ583392 |
|                                   | HLC-15007 | TZAIB712-06 | FJ583393 |
| <i>Fusigobius inframaculatus</i>  | HLC-11774 | TZAIC712-06 | FJ583413 |
| <i>Fusigobius signipinnis</i>     | HLC-11556 | TZAIC488-06 | FJ583414 |
| <i>Gobiodon ceramensis</i>        | HLC-15078 | TZAIB673-06 | FJ583428 |
|                                   | HLC-15079 | TZAIB674-06 | FJ583429 |
|                                   | HLC-15080 | TZAIB675-06 | FJ583430 |
|                                   | HLC-15081 | TZAIB676-06 | FJ583431 |
|                                   | HLC-15082 | TZAIB677-06 | FJ583432 |
| <i>Gobiodon histrio</i>           | HLC-10784 | TZAIC084-05 | FJ583433 |
|                                   | HLC-10783 | TZAIC083-05 | FJ583434 |
|                                   | HLC-11830 | TZAIC768-06 | FJ583435 |
|                                   | HLC-15044 | TZAIB715-06 | FJ583436 |
|                                   | HLC-15045 | TZAIB716-06 | FJ583437 |
|                                   | HLC-15046 | TZAIB717-06 | FJ583438 |
|                                   | HLC-15047 | TZAIB718-06 | FJ583439 |
|                                   | HLC-15048 | TZAIB719-06 | FJ583440 |
|                                   | HLC-12157 | TZAIB046-06 | FJ583441 |
|                                   | HLC-12158 | TZAIB047-06 | FJ583442 |
|                                   | HLC-12159 | TZAIB048-06 | FJ583443 |
|                                   | HLC-12160 | TZAIB049-06 | FJ583444 |
|                                   | HLC-12161 | TZAIB050-06 | FJ583445 |
|                                   | HLC-12162 | TZAIB051-06 | FJ583446 |
|                                   | HLC-11829 | TZAIC767-06 | FJ583447 |
|                                   | HLC-10786 | TZAIC086-05 | FJ583448 |
|                                   | HLC-10785 | TZAIC085-05 | FJ583449 |
|                                   | HLC-10782 | TZAIC082-05 | FJ583450 |
| <i>Gobiodon okinawae</i>          | HLC-13274 | TZAIB651-06 | FJ583451 |
|                                   | HLC-13275 | TZAIB652-06 | FJ583452 |
|                                   | HLC-13276 | TZAIB653-06 | FJ583453 |
|                                   | HLC-13278 | TZAIB655-06 | FJ583454 |
|                                   | HLC-10891 | TZAIC191-05 | FJ583455 |
|                                   | HLC-10893 | TZAIC193-05 | FJ583456 |
| <i>Gobiodon quinquestrigatus</i>  | HLC-10896 | TZAIC196-05 | FJ583457 |
|                                   | HLC-10898 | TZAIC198-05 | FJ583458 |
|                                   | HLC-10897 | TZAIC197-05 | FJ583459 |
| <i>Paragobiodon lacunicolus</i>   | HLC-15194 | TZAIB864-07 | FJ583828 |
|                                   | HLC-15195 | TZAIB865-07 | FJ583829 |
| <i>Taenioides sp.</i>             | HLC-11740 | TZAIC678-06 | FJ584163 |
|                                   | HLC-11739 | TZAIC677-06 | FJ584164 |
|                                   | HLC-11738 | TZAIC676-06 | FJ584165 |
|                                   | HLC-11737 | TZAIC675-06 | FJ584166 |
|                                   | HLC-10881 | TZAIC181-05 | FJ584167 |
| <i>Valenciennesa helsdingenii</i> | HLC-11963 | TZAIB228-06 | FJ584196 |
|                                   | HLC-11852 | TZAIC790-06 | FJ584197 |
|                                   | HLC-11851 | TZAIC789-06 | FJ584198 |
|                                   | HLC-11850 | TZAIC788-06 | FJ584199 |
|                                   | HLC-11849 | TZAIC787-06 | FJ584200 |
|                                   | HLC-11848 | TZAIC786-06 | FJ584201 |
| <i>Valenciennesa longipinnis</i>  | HLC-12266 | TZAIC907-06 | FJ584202 |
| <i>Valenciennesa muralis</i>      | HLC-12267 | TZAIC908-06 | FJ584203 |
|                                   | HLC-12265 | TZAIC906-06 | FJ584204 |
|                                   | HLC-11019 | TZAIC311-05 | FJ584205 |
| <i>Valenciennesa puellaris</i>    | HLC-10815 | TZAIC115-05 | FJ584206 |
|                                   | HLC-10814 | TZAIC114-05 | FJ584207 |
|                                   | HLC-12252 | TZAIC893-06 | FJ584208 |
|                                   | HLC-12251 | TZAIC892-06 | FJ584209 |
|                                   | HLC-12250 | TZAIC891-06 | FJ584210 |
|                                   | HLC-12249 | TZAIC890-06 | FJ584211 |
|                                   | HLC-12248 | TZAIC889-06 | FJ584212 |
|                                   | HLC-11578 | TZAIC510-06 | FJ584213 |

|                    |                                      |           |             |          |
|--------------------|--------------------------------------|-----------|-------------|----------|
|                    | <i>Valenciennea sexguttata</i>       | HLC-12052 | TZAIB129-06 | FJ584214 |
|                    |                                      | HLC-12051 | TZAIB128-06 | FJ584215 |
|                    |                                      | HLC-12050 | TZAIB127-06 | FJ584216 |
|                    |                                      | HLC-12253 | TZAIC894-06 | FJ584217 |
|                    |                                      | HLC-12255 | TZAIC896-06 | FJ584218 |
|                    |                                      | HLC-12103 | TZAIB180-06 | FJ584219 |
|                    |                                      | HLC-12257 | TZAIC898-06 | FJ584220 |
|                    |                                      | HLC-12256 | TZAIC897-06 | FJ584221 |
|                    |                                      | HLC-12254 | TZAIC895-06 | FJ584222 |
|                    |                                      | HLC-11038 | TZAIC330-05 | FJ584223 |
|                    |                                      | HLC-11037 | TZAIC329-05 | FJ584224 |
|                    | <i>Valenciennea strigata</i>         | HLC-15003 | TZAIB720-06 | FJ584225 |
|                    |                                      | HLC-15099 | TZAIB782-07 | FJ584226 |
|                    |                                      | HLC-11011 | TZAIC303-05 | FJ584227 |
|                    |                                      | HLC-11010 | TZAIC302-05 | FJ584228 |
|                    |                                      | HLC-11009 | TZAIC301-05 | FJ584229 |
|                    |                                      | HLC-11008 | TZAIC300-05 | FJ584230 |
|                    |                                      | HLC-11012 | TZAIC304-05 | FJ584231 |
|                    | <i>Valenciennea wardii</i>           | HLC-12163 | TZAIB052-06 | FJ584232 |
|                    |                                      | HLC-12056 | TZAIB133-06 | FJ584233 |
|                    |                                      | HLC-12102 | TZAIB179-06 | FJ584234 |
|                    |                                      | HLC-12104 | TZAIB181-06 | FJ584235 |
|                    |                                      | HLC-12105 | TZAIB182-06 | FJ584236 |
|                    |                                      | HLC-15111 | TZAIB794-07 | FJ584237 |
|                    |                                      | HLC-10813 | TZAIC113-05 | FJ584238 |
|                    |                                      | HLC-10811 | TZAIC111-05 | FJ584239 |
|                    |                                      | HLC-10812 | TZAIC112-05 | FJ584240 |
| Family Grammatidae | <i>Gramma loreto</i>                 | HLC-11984 | TZAIB249-06 | FJ583467 |
|                    |                                      | HLC-11983 | TZAIB248-06 | FJ583468 |
|                    |                                      | HLC-11986 | TZAIB251-06 | FJ583469 |
|                    |                                      | HLC-11982 | TZAIB247-06 | FJ583470 |
|                    |                                      | HLC-10998 | TZAIC290-05 | FJ583471 |
|                    |                                      | HLC-11000 | TZAIC292-05 | FJ583472 |
|                    |                                      | HLC-11001 | TZAIC293-05 | FJ583473 |
|                    |                                      | HLC-11004 | TZAIC296-05 | FJ583474 |
|                    |                                      | HLC-10999 | TZAIC291-05 | FJ583475 |
|                    |                                      | HLC-11002 | TZAIC294-05 | FJ583476 |
|                    |                                      | HLC-11003 | TZAIC295-05 | FJ583477 |
|                    | <i>Gramma melacara</i>               | HLC-12359 | TZAIB342-06 | FJ583478 |
|                    |                                      | HLC-12362 | TZAIB345-06 | FJ583479 |
|                    |                                      | HLC-12080 | TZAIB157-06 | FJ583480 |
|                    |                                      | HLC-11985 | TZAIB250-06 | FJ583481 |
|                    |                                      | HLC-11952 | TZAIB217-06 | FJ583482 |
|                    |                                      | HLC-11953 | TZAIB218-06 | FJ583483 |
| Family Haemulidae  | <i>Anisotremus virginicus</i>        | HLC-13035 | TZAIB412-06 | FJ582849 |
|                    | <i>Haemulon plumierii</i>            | HLC-12048 | TZAIB125-06 | FJ583484 |
|                    | <i>Plectorhinchus chaetodonoides</i> | HLC-11165 | TZAIC457-05 | FJ583860 |
|                    |                                      | HLC-11164 | TZAIC456-05 | FJ583861 |
|                    |                                      | HLC-11166 | TZAIC458-05 | FJ583862 |
|                    |                                      | HLC-11006 | TZAIC298-05 | FJ583863 |
|                    |                                      | HLC-11007 | TZAIC299-05 | FJ583864 |
|                    | <i>Plectorhinchus picus</i>          | HLC-12113 | TZAIB002-06 | FJ583865 |
|                    |                                      | HLC-12112 | TZAIB001-06 | FJ583866 |
|                    |                                      | HLC-12114 | TZAIB003-06 | FJ583867 |
|                    |                                      | HLC-12115 | TZAIB004-06 | FJ583868 |
| Family Labridae    | <i>Anampses lineatus</i>             | HLC-10808 | TZAIC108-05 | FJ582831 |
|                    | <i>Anampses meleagrides</i>          | HLC-13239 | TZAIB616-06 | FJ582832 |
|                    |                                      | HLC-13240 | TZAIB617-06 | FJ582833 |
|                    |                                      | HLC-13245 | TZAIB622-06 | FJ582834 |
|                    |                                      | HLC-13246 | TZAIB623-06 | FJ582835 |
|                    |                                      | HLC-12322 | TZAIB305-06 | FJ582836 |
|                    |                                      | HLC-15049 | TZAIB724-06 | FJ582837 |
|                    |                                      | HLC-15050 | TZAIB725-06 | FJ582838 |
|                    |                                      | HLC-15051 | TZAIB726-06 | FJ582839 |
|                    |                                      | HLC-15052 | TZAIB727-06 | FJ582840 |
|                    |                                      | HLC-15053 | TZAIB728-06 | FJ582841 |
|                    |                                      | HLC-13244 | TZAIB621-06 | FJ582842 |
|                    | <i>Anampses neoguinaicus</i>         | HLC-13183 | TZAIB560-06 | FJ582843 |
|                    |                                      | HLC-11062 | TZAIC354-05 | FJ582844 |
|                    |                                      | HLC-11705 | TZAIC637-06 | FJ582845 |
|                    |                                      | HLC-11800 | TZAIC738-06 | FJ582846 |
|                    |                                      | HLC-11560 | TZAIC492-06 | FJ582847 |
|                    | <i>Anampses twistii</i>              | HLC-11028 | TZAIC320-05 | FJ582848 |
|                    | <i>Bodianus anthioides</i>           | HLC-13187 | TZAIB564-06 | FJ582899 |
|                    | <i>Bodianus loxozonus</i>            | HLC-11677 | TZAIC609-06 | FJ582900 |
|                    |                                      | HLC-11577 | TZAIC509-06 | FJ582901 |
|                    | <i>Bodianus pulchellus</i>           | HLC-11025 | TZAIC317-05 | FJ582902 |
|                    | <i>Bodianus rufus</i>                | HLC-12307 | TZAIB290-06 | FJ582903 |
|                    |                                      | HLC-15089 | TZAIB772-07 | FJ582904 |

|                                     |           |             |          |
|-------------------------------------|-----------|-------------|----------|
|                                     | HLC-15090 | TZAIB773-07 | FJ582905 |
|                                     | HLC-15091 | TZAIB774-07 | FJ582906 |
|                                     | HLC-15092 | TZAIB775-07 | FJ582907 |
| <i>Cheilinus fasciatus</i>          | HLC-13075 | TZAIB452-06 | FJ583119 |
|                                     | HLC-11559 | TZAIC491-06 | FJ583120 |
| <i>Cheilinus oxycephalus</i>        | HLC-11085 | TZAIC377-05 | FJ583121 |
|                                     | HLC-12142 | TZAIB031-06 | FJ583122 |
|                                     | HLC-12143 | TZAIB032-06 | FJ583123 |
|                                     | HLC-12144 | TZAIB033-06 | FJ583124 |
|                                     | HLC-12145 | TZAIB034-06 | FJ583125 |
| <i>Cirrhilabrus cyanopleura</i>     | HLC-15146 | TZAIB828-07 | FJ583213 |
|                                     | HLC-15148 | TZAIB830-07 | FJ583214 |
|                                     | HLC-15149 | TZAIB831-07 | FJ583215 |
|                                     | HLC-11669 | TZAIC601-06 | FJ583216 |
|                                     | HLC-11668 | TZAIC600-06 | FJ583217 |
|                                     | HLC-11667 | TZAIC599-06 | FJ583218 |
|                                     | HLC-11666 | TZAIC598-06 | FJ583219 |
| <i>Cirrhilabrus exquisitus</i>      | HLC-11665 | TZAIC597-06 | FJ583220 |
|                                     | HLC-11551 | TZAIC483-06 | FJ583221 |
|                                     | HLC-11550 | TZAIC482-06 | FJ583222 |
| <i>Cirrhilabrus flavidorsalis</i>   | HLC-11964 | TZAIB229-06 | FJ583223 |
|                                     | HLC-11965 | TZAIB230-06 | FJ583224 |
|                                     | HLC-11966 | TZAIB231-06 | FJ583225 |
|                                     | HLC-15100 | TZAIB783-07 | FJ583226 |
|                                     | HLC-15101 | TZAIB784-07 | FJ583227 |
|                                     | HLC-11997 | TZAIB262-06 | FJ583228 |
|                                     | HLC-11998 | TZAIB263-06 | FJ583229 |
|                                     | HLC-11664 | TZAIC596-06 | FJ583230 |
|                                     | HLC-11663 | TZAIC595-06 | FJ583231 |
| <i>Cirrhilabrus lubbocki</i>        | HLC-11662 | TZAIC594-06 | FJ583232 |
|                                     | HLC-11836 | TZAIC774-06 | FJ583233 |
|                                     | HLC-11837 | TZAIC775-06 | FJ583234 |
|                                     | HLC-11592 | TZAIC524-06 | FJ583235 |
|                                     | HLC-11591 | TZAIC523-06 | FJ583236 |
|                                     | HLC-10807 | TZAIC107-05 | FJ583237 |
| <i>Cirrhilabrus rubrimarginatus</i> | HLC-10810 | TZAIC110-05 | FJ583238 |
|                                     | HLC-13256 | TZAIB633-06 | FJ583239 |
|                                     | HLC-10964 | TZAIC264-05 | FJ583240 |
| <i>Cirrhilabrus rubriventralis</i>  | HLC-11972 | TZAIB237-06 | FJ583241 |
|                                     | HLC-10963 | TZAIC263-05 | FJ583242 |
| <i>Cirrhilabrus scottorum</i>       | HLC-11797 | TZAIC735-06 | FJ583243 |
|                                     | HLC-11701 | TZAIC633-06 | FJ583244 |
|                                     | HLC-11799 | TZAIC737-06 | FJ583245 |
|                                     | HLC-11798 | TZAIC736-06 | FJ583246 |
|                                     | HLC-11566 | TZAIC498-06 | FJ583247 |
|                                     | HLC-11136 | TZAIC428-05 | FJ583248 |
|                                     | HLC-10972 | TZAIC272-05 | FJ583249 |
| <i>Coris formosa</i>                | HLC-15208 | TZAIB878-07 | FJ583258 |
|                                     | HLC-11891 | TZAIC829-06 | FJ583259 |
|                                     | HLC-11776 | TZAIC714-06 | FJ583260 |
| <i>Coris gaimard</i>                | HLC-12072 | TZAIB149-06 | FJ583261 |
|                                     | HLC-12073 | TZAIB150-06 | FJ583262 |
|                                     | HLC-11175 | TZAIC663-06 | FJ583263 |
|                                     | HLC-11172 | TZAIC660-06 | FJ583264 |
|                                     | HLC-11087 | TZAIC379-05 | FJ583265 |
|                                     | HLC-11086 | TZAIC378-05 | FJ583266 |
|                                     | HLC-10933 | TZAIC233-05 | FJ583267 |
|                                     | HLC-10934 | TZAIC234-05 | FJ583268 |
|                                     | HLC-10935 | TZAIC235-05 | FJ583269 |
|                                     | HLC-11070 | TZAIC362-05 | FJ583270 |
| <i>Gomphosus varius</i>             | HLC-11781 | TZAIC719-06 | FJ583460 |
|                                     | HLC-11815 | TZAIC753-06 | FJ583461 |
|                                     | HLC-15205 | TZAIB875-07 | FJ583462 |
|                                     | HLC-15236 | TZAIB906-07 | FJ583463 |
|                                     | HLC-13079 | TZAIB456-06 | FJ583464 |
|                                     | HLC-11104 | TZAIC396-05 | FJ583465 |
|                                     | HLC-11103 | TZAIC395-05 | FJ583466 |
| <i>Halichoeres biocellatus</i>      | HLC-11714 | TZAIC646-06 | FJ583485 |
|                                     | HLC-11174 | TZAIC662-06 | FJ583486 |
|                                     | HLC-11713 | TZAIC645-06 | FJ583487 |
|                                     | HLC-11712 | TZAIC644-06 | FJ583488 |
|                                     | HLC-11167 | TZAIC459-05 | FJ583489 |
| <i>Halichoeres chloropterus</i>     | HLC-11023 | TZAIC315-05 | FJ583490 |
|                                     | HLC-11772 | TZAIC710-06 | FJ583491 |
|                                     | HLC-11771 | TZAIC709-06 | FJ583492 |
|                                     | HLC-11770 | TZAIC708-06 | FJ583493 |
|                                     | HLC-11022 | TZAIC314-05 | FJ583494 |
| <i>Halichoeres chrysus</i>          | HLC-11587 | TZAIC519-06 | FJ583495 |
|                                     | HLC-11588 | TZAIC520-06 | FJ583496 |



|                                   |           |             |          |
|-----------------------------------|-----------|-------------|----------|
|                                   | HLC-11586 | TZAIC518-06 | FJ583497 |
|                                   | HLC-11589 | TZAIC521-06 | FJ583498 |
|                                   | HLC-10809 | TZAIC109-05 | FJ583499 |
| <i>Halichoeres garnoti</i>        | HLC-12352 | TZAIB335-06 | FJ583500 |
|                                   | HLC-12353 | TZAIB336-06 | FJ583501 |
| <i>Halichoeres hortulanus</i>     | HLC-12155 | TZAIB044-06 | FJ583502 |
|                                   | HLC-12156 | TZAIB045-06 | FJ583503 |
|                                   | HLC-10819 | TZAIC119-05 | FJ583504 |
|                                   | HLC-10818 | TZAIC118-05 | FJ583505 |
| <i>Halichoeres leucoxanthus</i>   | HLC-12064 | TZAIB141-06 | FJ583506 |
|                                   | HLC-12061 | TZAIB138-06 | FJ583507 |
|                                   | HLC-12062 | TZAIB139-06 | FJ583508 |
|                                   | HLC-12063 | TZAIB140-06 | FJ583509 |
|                                   | HLC-12065 | TZAIB142-06 | FJ583510 |
| <i>Halichoeres marginatus</i>     | HLC-11595 | TZAIC527-06 | FJ583511 |
|                                   | HLC-10849 | TZAIC149-05 | FJ583512 |
|                                   | HLC-10966 | TZAIC266-05 | FJ583513 |
| <i>Halichoeres melanurus</i>      | HLC-10848 | TZAIC148-05 | FJ583514 |
|                                   | HLC-11890 | TZAIC828-06 | FJ583515 |
|                                   | HLC-11889 | TZAIC827-06 | FJ583516 |
|                                   | HLC-11888 | TZAIC826-06 | FJ583517 |
|                                   | HLC-11887 | TZAIC825-06 | FJ583518 |
|                                   | HLC-11886 | TZAIC824-06 | FJ583519 |
|                                   | HLC-10847 | TZAIC147-05 | FJ583520 |
|                                   | HLC-10968 | TZAIC268-05 | FJ583521 |
|                                   | HLC-10965 | TZAIC265-05 | FJ583522 |
|                                   | HLC-10967 | TZAIC267-05 | FJ583523 |
|                                   | HLC-10969 | TZAIC269-05 | FJ583524 |
| <i>Halichoeres ornatissimus</i>   | HLC-13106 | TZAIB483-06 | FJ583525 |
|                                   | HLC-13108 | TZAIB485-06 | FJ583526 |
|                                   | HLC-11709 | TZAIC641-06 | FJ583527 |
|                                   | HLC-11708 | TZAIC640-06 | FJ583528 |
|                                   | HLC-11792 | TZAIC730-06 | FJ583529 |
|                                   | HLC-13107 | TZAIB484-06 | FJ583530 |
|                                   | HLC-10885 | TZAIC185-05 | FJ583531 |
| <i>Halichoeres sp.</i>            | HLC-11585 | TZAIC517-06 | FJ583532 |
| <i>Hemigymnus fasciatus</i>       | HLC-13076 | TZAIB453-06 | FJ583533 |
|                                   | HLC-13077 | TZAIB454-06 | FJ583534 |
|                                   | HLC-13078 | TZAIB455-06 | FJ583535 |
| <i>Labrichthys unilineatus</i>    | HLC-15228 | TZAIB898-07 | FJ583587 |
| <i>Labroides dimidiatus</i>       | HLC-10841 | TZAIC141-05 | FJ583588 |
|                                   | HLC-10840 | TZAIC140-05 | FJ583589 |
|                                   | HLC-12211 | TZAIC852-06 | FJ583590 |
|                                   | HLC-12210 | TZAIC851-06 | FJ583591 |
|                                   | HLC-11605 | TZAIC537-06 | FJ583592 |
|                                   | HLC-11604 | TZAIC536-06 | FJ583593 |
|                                   | HLC-11603 | TZAIC535-06 | FJ583594 |
|                                   | HLC-10952 | TZAIC252-05 | FJ583595 |
|                                   | HLC-10959 | TZAIC259-05 | FJ583596 |
|                                   | HLC-10956 | TZAIC256-05 | FJ583597 |
|                                   | HLC-10954 | TZAIC254-05 | FJ583598 |
|                                   | HLC-10958 | TZAIC258-05 | FJ583599 |
|                                   | HLC-10955 | TZAIC255-05 | FJ583600 |
|                                   | HLC-10953 | TZAIC253-05 | FJ583601 |
|                                   | HLC-10957 | TZAIC257-05 | FJ583602 |
|                                   | HLC-10961 | TZAIC261-05 | FJ583603 |
|                                   | HLC-10960 | TZAIC260-05 | FJ583604 |
| <i>Macropharyngodon meleagris</i> | HLC-15192 | TZAIB862-07 | FJ583630 |
|                                   | HLC-15059 | TZAIB729-06 | FJ583631 |
|                                   | HLC-11700 | TZAIC632-06 | FJ583632 |
|                                   | HLC-11699 | TZAIC631-06 | FJ583633 |
|                                   | HLC-11698 | TZAIC630-06 | FJ583634 |
|                                   | HLC-11697 | TZAIC629-06 | FJ583635 |
|                                   | HLC-11696 | TZAIC628-06 | FJ583636 |
|                                   | HLC-11841 | TZAIC779-06 | FJ583637 |
|                                   | HLC-11840 | TZAIC778-06 | FJ583638 |
|                                   | HLC-11539 | TZAIC471-06 | FJ583639 |
|                                   | HLC-11099 | TZAIC391-05 | FJ583640 |
|                                   | HLC-11100 | TZAIC392-05 | FJ583641 |
|                                   | HLC-11101 | TZAIC393-05 | FJ583642 |
|                                   | HLC-11102 | TZAIC394-05 | FJ583643 |
|                                   | HLC-10971 | TZAIC271-05 | FJ583644 |
|                                   | HLC-10970 | TZAIC270-05 | FJ583645 |
| <i>Macropharyngodon ornatus</i>   | HLC-11063 | TZAIC355-05 | FJ583646 |
| <i>Novaculichthys taeniourus</i>  | HLC-12323 | TZAIB306-06 | FJ583739 |
|                                   | HLC-15157 | TZAIB839-07 | FJ583740 |
|                                   | HLC-12228 | TZAIC869-06 | FJ583741 |
|                                   | HLC-12227 | TZAIC868-06 | FJ583742 |
|                                   | HLC-11113 | TZAIC405-05 | FJ583743 |

|                      |                                    |             |             |          |
|----------------------|------------------------------------|-------------|-------------|----------|
|                      | <i>Paracheilinus carpenteri</i>    | HLC-12246   | TZAIC887-06 | FJ583810 |
|                      |                                    | HLC-12243   | TZAIC884-06 | FJ583811 |
|                      |                                    | HLC-12247   | TZAIC888-06 | FJ583812 |
|                      |                                    | HLC-12245   | TZAIC886-06 | FJ583813 |
|                      |                                    | HLC-12244   | TZAIC885-06 | FJ583814 |
|                      |                                    | HLC-11024   | TZAIC316-05 | FJ583815 |
|                      | <i>Paracheilinus mccoskeri</i>     | HLC-15136   | TZAIB818-07 | FJ583816 |
|                      |                                    | HLC-15137   | TZAIB819-07 | FJ583817 |
|                      |                                    | HLC-15138   | TZAIB820-07 | FJ583818 |
|                      |                                    | HLC-15139   | TZAIB821-07 | FJ583819 |
|                      |                                    | HLC-15140   | TZAIB822-07 | FJ583820 |
|                      | <i>Pseudocheilinus evanidus</i>    | HLC-13123   | TZAIB500-06 | FJ583964 |
|                      |                                    | HLC-15166   | TZAIB848-07 | FJ583965 |
|                      |                                    | HLC-12341   | TZAIB324-06 | FJ583966 |
|                      | <i>Pseudocheilinus hexataenia</i>  | HLC-15020   | TZAIB721-06 | FJ583967 |
|                      |                                    | HLC-15021   | TZAIB722-06 | FJ583968 |
|                      |                                    | HLC-15022   | TZAIB723-06 | FJ583969 |
|                      |                                    | HLC-11671   | TZAIC603-06 | FJ583970 |
|                      |                                    | HLC-11670   | TZAIC602-06 | FJ583971 |
|                      | <i>Pseudocheilinus octotaenia</i>  | HLC-15118   | TZAIB800-07 | FJ583972 |
|                      | <i>Pseudocheilinus tetrataenia</i> | HLC-15102   | TZAIB785-07 | FJ583973 |
|                      |                                    | HLC-15103   | TZAIB786-07 | FJ583974 |
|                      |                                    | HLC-15104   | TZAIB787-07 | FJ583975 |
|                      |                                    | HLC-15105   | TZAIB788-07 | FJ583976 |
|                      |                                    | HLC-15106   | TZAIB789-07 | FJ583977 |
|                      | <i>Pseudocoris yamashiroi</i>      | HLC-11558   | TZAIC490-06 | FJ583991 |
|                      |                                    | HLC-11557   | TZAIC489-06 | FJ583992 |
|                      | <i>Pseudodax moluccanus</i>        | HLC-12054   | TZAIB131-06 | FJ583993 |
|                      |                                    | HLC-12055   | TZAIB132-06 | FJ583994 |
|                      | <i>Stethojulis bandanensis</i>     | HLC-15196   | TZAIB866-07 | FJ584126 |
|                      |                                    | HLC-15199   | TZAIB869-07 | FJ584127 |
|                      | <i>Thalassoma bifasciatum</i>      | HLC-13120   | TZAIB497-06 | FJ584172 |
|                      |                                    | HLC-12336   | TZAIB319-06 | FJ584173 |
|                      |                                    | HLC-12077   | TZAIB154-06 | FJ584174 |
|                      |                                    | HLC-12074   | TZAIB151-06 | FJ584175 |
|                      |                                    | HLC-12075   | TZAIB152-06 | FJ584176 |
|                      |                                    | HLC-12076   | TZAIB153-06 | FJ584177 |
|                      |                                    | HLC-12078   | TZAIB155-06 | FJ584178 |
|                      |                                    | HLC-13151   | TZAIB528-06 | FJ584179 |
|                      |                                    | HLC-13173   | TZAIB550-06 | FJ584180 |
|                      | <i>Thalassoma hardwicke</i>        | HLC-15201   | TZAIB871-07 | FJ584181 |
|                      |                                    | HLC-15203   | TZAIB873-07 | FJ584182 |
|                      | <i>Thalassoma lunare</i>           | HLC-13072   | TZAIB449-06 | FJ584183 |
|                      |                                    | HLC-13073   | TZAIB450-06 | FJ584184 |
|                      |                                    | HLC-15198   | TZAIB868-07 | FJ584185 |
|                      | <i>Thalassoma lutescens</i>        | HLC-11879   | TZAIC817-06 | FJ584186 |
|                      |                                    | HLC-11805   | TZAIC743-06 | FJ584187 |
|                      |                                    | HLC-11804   | TZAIC742-06 | FJ584188 |
|                      |                                    | HLC-11803   | TZAIC741-06 | FJ584189 |
|                      |                                    | HLC-11802   | TZAIC740-06 | FJ584190 |
|                      |                                    | HLC-11801   | TZAIC739-06 | FJ584191 |
|                      | <i>Thalassoma quinquevittatum</i>  | HLC-13097   | TZAIB474-06 | FJ584192 |
|                      |                                    | HLC-13098   | TZAIB475-06 | FJ584193 |
|                      |                                    | HLC-13099   | TZAIB476-06 | FJ584194 |
|                      |                                    | HLC-13100   | TZAIB477-06 | FJ584195 |
| Family Labrisomidae  | <i>Paraclinus marmoratus</i>       | HLC-11962   | TZAIB227-06 | FJ583827 |
| Family Lutjanidae    | <i>Macolor niger</i>               | HLC-11905   | TZAIC843-06 | FJ583628 |
|                      |                                    | HLC-11904   | TZAIC842-06 | FJ583629 |
|                      | <i>Symphoricthys spilurus</i>      | HLC-TSZ-013 | TZAIC013-05 | FJ584133 |
|                      |                                    | HLC-15004   | TZAIB730-06 | FJ584134 |
|                      |                                    | HLC-13166   | TZAIB543-06 | FJ584135 |
| Family Malacanthidae | <i>Hoplolatilus chluapatyi</i>     | HLC-13174   | TZAIB551-06 | FJ583569 |
|                      |                                    | HLC-15167   | TZAIB849-07 | FJ583570 |
|                      | <i>Hoplolatilus marcosi</i>        | HLC-13140   | TZAIB517-06 | FJ583571 |
|                      |                                    | HLC-13141   | TZAIB518-06 | FJ583572 |
|                      |                                    | HLC-13142   | TZAIB519-06 | FJ583573 |
|                      |                                    | HLC-15096   | TZAIB779-07 | FJ583574 |
|                      | <i>Hoplolatilus purpureus</i>      | HLC-11764   | TZAIC702-06 | FJ583575 |
|                      |                                    | HLC-11119   | TZAIC411-05 | FJ583576 |
| Family Microdesmidae | <i>Nemateleotris decora</i>        | HLC-11629   | TZAIC561-06 | FJ583701 |
|                      |                                    | HLC-11628   | TZAIC560-06 | FJ583702 |
|                      |                                    | HLC-11627   | TZAIC559-06 | FJ583703 |
|                      |                                    | HLC-11057   | TZAIC349-05 | FJ583704 |
|                      | <i>Nemateleotris magnifica</i>     | HLC-11091   | TZAIC383-05 | FJ583705 |
|                      |                                    | HLC-13084   | TZAIB461-06 | FJ583706 |
|                      |                                    | HLC-13085   | TZAIB462-06 | FJ583707 |
|                      |                                    | HLC-13086   | TZAIB463-06 | FJ583708 |
|                      |                                    | HLC-13087   | TZAIB464-06 | FJ583709 |
|                      |                                    | HLC-13088   | TZAIB465-06 | FJ583710 |

|                        |                                   |           |             |          |
|------------------------|-----------------------------------|-----------|-------------|----------|
|                        |                                   | HLC-11090 | TZAIC382-05 | FJ583711 |
|                        |                                   | HLC-11092 | TZAIC384-05 | FJ583712 |
|                        |                                   | HLC-11089 | TZAIC381-05 | FJ583713 |
|                        |                                   | HLC-11088 | TZAIC380-05 | FJ583714 |
|                        | <i>Ptereleotris evides</i>        | HLC-12128 | TZAIB017-06 | FJ584000 |
|                        |                                   | HLC-12129 | TZAIB018-06 | FJ584001 |
|                        | <i>Ptereleotris monoptera</i>     | HLC-12218 | TZAIC859-06 | FJ584002 |
|                        |                                   | HLC-12220 | TZAIC861-06 | FJ584003 |
|                        |                                   | HLC-12217 | TZAIC858-06 | FJ584004 |
|                        |                                   | HLC-11659 | TZAIC591-06 | FJ584005 |
|                        |                                   | HLC-11658 | TZAIC590-06 | FJ584006 |
|                        |                                   | HLC-11657 | TZAIC589-06 | FJ584007 |
|                        |                                   | HLC-11656 | TZAIC588-06 | FJ584008 |
|                        |                                   | HLC-11655 | TZAIC587-06 | FJ584009 |
|                        | <i>Ptereleotris sp.</i>           | HLC-12269 | TZAIC910-06 | FJ584010 |
|                        | <i>Ptereleotris zebra</i>         | HLC-11950 | TZAIB215-06 | FJ584011 |
|                        |                                   | HLC-11948 | TZAIB213-06 | FJ584012 |
|                        |                                   | HLC-11947 | TZAIB212-06 | FJ584013 |
|                        |                                   | HLC-11946 | TZAIB211-06 | FJ584014 |
|                        |                                   | HLC-11949 | TZAIB214-06 | FJ584015 |
| Family Monodactylidae  | <i>Monodactylus argenteus</i>     | HLC-10993 | TZAIC285-05 | FJ583663 |
|                        |                                   | HLC-10994 | TZAIC286-05 | FJ583664 |
|                        |                                   | HLC-10995 | TZAIC287-05 | FJ583665 |
|                        |                                   | HLC-10996 | TZAIC288-05 | FJ583666 |
|                        |                                   | HLC-10997 | TZAIC289-05 | FJ583667 |
| Family Mullidae        | <i>Parupeneus barberinoides</i>   | HLC-15029 | TZAIB731-06 | FJ583832 |
|                        |                                   | HLC-15030 | TZAIB732-06 | FJ583833 |
|                        |                                   | HLC-15031 | TZAIB733-06 | FJ583834 |
|                        |                                   | HLC-15032 | TZAIB734-06 | FJ583835 |
|                        |                                   | HLC-11031 | TZAIC323-05 | FJ583836 |
|                        |                                   | HLC-11032 | TZAIC324-05 | FJ583837 |
|                        |                                   | HLC-11030 | TZAIC322-05 | FJ583838 |
|                        |                                   | HLC-11034 | TZAIC326-05 | FJ583839 |
|                        |                                   | HLC-11033 | TZAIC325-05 | FJ583840 |
|                        | <i>Parupeneus cyclostomus</i>     | HLC-11083 | TZAIC375-05 | FJ583841 |
|                        |                                   | HLC-10883 | TZAIC183-05 | FJ583842 |
| Family Opistognathidae | <i>Opistognathus aurifrons</i>    | HLC-13136 | TZAIB513-06 | FJ583756 |
|                        |                                   | HLC-11742 | TZAIC680-06 | FJ583757 |
|                        |                                   | HLC-13132 | TZAIB509-06 | FJ583758 |
|                        |                                   | HLC-13133 | TZAIB510-06 | FJ583759 |
|                        |                                   | HLC-13134 | TZAIB511-06 | FJ583760 |
|                        |                                   | HLC-13135 | TZAIB512-06 | FJ583761 |
|                        |                                   | HLC-11741 | TZAIC679-06 | FJ583762 |
|                        | <i>Opistognathus punctatus</i>    | HLC-12140 | TZAIB029-06 | FJ583763 |
|                        |                                   | HLC-12141 | TZAIB030-06 | FJ583764 |
|                        |                                   | HLC-13288 | TZAIB665-06 | FJ583765 |
|                        |                                   | HLC-11789 | TZAIC727-06 | FJ583766 |
|                        | <i>Opistognathus rosenblatti</i>  | HLC-15123 | TZAIB805-07 | FJ583767 |
|                        |                                   | HLC-15124 | TZAIB806-07 | FJ583768 |
| Family Plesiopidae     | <i>Callopleiops altivelis</i>     | HLC-11930 | TZAIB195-06 | FJ582909 |
|                        |                                   | HLC-12137 | TZAIB026-06 | FJ582910 |
|                        |                                   | HLC-11704 | TZAIC636-06 | FJ582911 |
|                        |                                   | HLC-11703 | TZAIC635-06 | FJ582912 |
|                        |                                   | HLC-11702 | TZAIC634-06 | FJ582913 |
| Family Pomacanthidae   | <i>Apolemichthys trimaculatus</i> | HLC-12340 | TZAIB323-06 | FJ582868 |
|                        |                                   | HLC-12019 | TZAIB096-06 | FJ582869 |
|                        |                                   | HLC-12020 | TZAIB097-06 | FJ582870 |
|                        |                                   | HLC-12021 | TZAIB098-06 | FJ582871 |
|                        |                                   | HLC-12022 | TZAIB099-06 | FJ582872 |
|                        | <i>Apolemichthys xanthurus</i>    | HLC-12385 | TZAIB368-06 | FJ582873 |
|                        |                                   | HLC-13188 | TZAIB565-06 | FJ582874 |
|                        | <i>Centropyge sp.</i>             | HLC-11631 | TZAIC563-06 | FJ582927 |
|                        | <i>Centropyge argi</i>            | HLC-15151 | TZAIB833-07 | FJ582928 |
|                        |                                   | HLC-15152 | TZAIB834-07 | FJ582929 |
|                        |                                   | HLC-15153 | TZAIB835-07 | FJ582930 |
|                        |                                   | HLC-15154 | TZAIB836-07 | FJ582931 |
|                        |                                   | HLC-13279 | TZAIB656-06 | FJ582932 |
|                        |                                   | HLC-11594 | TZAIC526-06 | FJ582933 |
|                        |                                   | HLC-10948 | TZAIC248-05 | FJ582934 |
|                        |                                   | HLC-10947 | TZAIC247-05 | FJ582935 |
|                        |                                   | HLC-10946 | TZAIC246-05 | FJ582936 |
|                        |                                   | HLC-10945 | TZAIC245-05 | FJ582937 |
|                        |                                   | HLC-10944 | TZAIC244-05 | FJ582938 |
|                        | <i>Centropyge bicolor</i>         | HLC-12122 | TZAIB011-06 | FJ582939 |
|                        |                                   | HLC-11763 | TZAIC701-06 | FJ582940 |
|                        |                                   | HLC-11762 | TZAIC700-06 | FJ582941 |
|                        |                                   | HLC-11761 | TZAIC699-06 | FJ582942 |
|                        |                                   | HLC-11156 | TZAIC448-05 | FJ582943 |
|                        |                                   | HLC-11155 | TZAIC447-05 | FJ582944 |

|                                          |           |             |          |
|------------------------------------------|-----------|-------------|----------|
|                                          | HLC-10942 | TZAIC242-05 | FJ582945 |
|                                          | HLC-10880 | TZAIC180-05 | FJ582946 |
|                                          | HLC-10879 | TZAIC179-05 | FJ582947 |
| <i>Centropyge bispinosa</i>              | HLC-12029 | TZAIB106-06 | FJ582948 |
|                                          | HLC-11680 | TZAIC612-06 | FJ582949 |
|                                          | HLC-11109 | TZAIC401-05 | FJ582950 |
|                                          | HLC-11108 | TZAIC400-05 | FJ582951 |
|                                          | HLC-11107 | TZAIC399-05 | FJ582952 |
|                                          | HLC-11106 | TZAIC398-05 | FJ582953 |
|                                          | HLC-10932 | TZAIC232-05 | FJ582954 |
|                                          | HLC-10931 | TZAIC231-05 | FJ582955 |
|                                          | HLC-10930 | TZAIC230-05 | FJ582956 |
|                                          | HLC-10929 | TZAIC229-05 | FJ582957 |
|                                          | HLC-10928 | TZAIC228-05 | FJ582958 |
| <i>Centropyge eibli</i>                  | HLC-15216 | TZAIB886-07 | FJ582959 |
|                                          | HLC-15215 | TZAIB885-07 | FJ582960 |
| <i>Centropyge ferrugata</i>              | HLC-12060 | TZAIB137-06 | FJ582961 |
|                                          | HLC-12059 | TZAIB136-06 | FJ582962 |
|                                          | HLC-12058 | TZAIB135-06 | FJ582963 |
| <i>Centropyge flavissima</i>             | HLC-10882 | TZAIC182-05 | FJ582964 |
| <i>Centropyge heraldi</i>                | HLC-15119 | TZAIB801-07 | FJ582965 |
|                                          | HLC-15168 | TZAIB850-07 | FJ582966 |
|                                          | HLC-12131 | TZAIB020-06 | FJ582967 |
|                                          | HLC-11144 | TZAIC436-05 | FJ582968 |
|                                          | HLC-11143 | TZAIC435-05 | FJ582969 |
|                                          | HLC-11027 | TZAIC319-05 | FJ582970 |
|                                          | HLC-11026 | TZAIC318-05 | FJ582971 |
|                                          | HLC-10794 | TZAIC094-05 | FJ582972 |
|                                          | HLC-10793 | TZAIC093-05 | FJ582973 |
| <i>Centropyge loricula</i>               | HLC-11732 | TZAIC670-06 | FJ582974 |
|                                          | HLC-11731 | TZAIC669-06 | FJ582975 |
|                                          | HLC-11707 | TZAIC639-06 | FJ582976 |
| <i>Centropyge multicolor</i>             | HLC-13130 | TZAIB507-06 | FJ582977 |
|                                          | HLC-13121 | TZAIB498-06 | FJ582978 |
| <i>Centropyge multifasciata</i>          | HLC-11112 | TZAIC404-05 | FJ582979 |
| <i>Centropyge nox</i>                    | HLC-12004 | TZAIB269-06 | FJ582980 |
|                                          | HLC-12005 | TZAIB270-06 | FJ582981 |
|                                          | HLC-11907 | TZAIC845-06 | FJ582982 |
|                                          | HLC-10943 | TZAIC243-05 | FJ582983 |
| <i>Centropyge potteri</i>                | HLC-10884 | TZAIC184-05 | FJ582984 |
|                                          | HLC-12316 | TZAIB299-06 | FJ582985 |
| <i>Centropyge tibicen</i>                | HLC-15054 | TZAIB741-06 | FJ582986 |
|                                          | HLC-15055 | TZAIB742-06 | FJ582987 |
|                                          | HLC-15056 | TZAIB743-06 | FJ582988 |
|                                          | HLC-12286 | TZAIC927-06 | FJ582989 |
|                                          | HLC-12272 | TZAIC913-06 | FJ582990 |
|                                          | HLC-11139 | TZAIC431-05 | FJ582991 |
|                                          | HLC-11138 | TZAIC430-05 | FJ582992 |
|                                          | HLC-10802 | TZAIC102-05 | FJ582993 |
| <i>Centropyge venustus</i>               | HLC-11173 | TZAIC661-06 | FJ582994 |
|                                          | HLC-11744 | TZAIC682-06 | FJ582995 |
| <i>Centropyge vrolikii</i>               | HLC-11078 | TZAIC370-05 | FJ582996 |
|                                          | HLC-11639 | TZAIC571-06 | FJ582997 |
|                                          | HLC-11638 | TZAIC570-06 | FJ582998 |
|                                          | HLC-11079 | TZAIC371-05 | FJ582999 |
|                                          | HLC-11077 | TZAIC369-05 | FJ583000 |
|                                          | HLC-11065 | TZAIC357-05 | FJ583001 |
|                                          | HLC-11715 | TZAIC647-06 | FJ583002 |
| <i>Chaetodontoplus caeruleopunctatus</i> | HLC-11935 | TZAIB200-06 | FJ583090 |
|                                          | HLC-12383 | TZAIB366-06 | FJ583091 |
|                                          | HLC-13210 | TZAIB587-06 | FJ583092 |
| <i>Chaetodontoplus melanosoma</i>        | HLC-13083 | TZAIB460-06 | FJ583093 |
| <i>Chaetodontoplus mesoleucus</i>        | HLC-12343 | TZAIB326-06 | FJ583094 |
| <i>Chaetodontoplus septentrionalis</i>   | HLC-15036 | TZAIB735-06 | FJ583095 |
|                                          | HLC-15037 | TZAIB736-06 | FJ583096 |
|                                          | HLC-15038 | TZAIB737-06 | FJ583097 |
|                                          | HLC-13248 | TZAIB625-06 | FJ583098 |
|                                          | HLC-13249 | TZAIB626-06 | FJ583099 |
|                                          | HLC-10889 | TZAIC189-05 | FJ583100 |
| <i>Genicanthus lamarck</i>               | HLC-12149 | TZAIB038-06 | FJ583415 |
|                                          | HLC-12150 | TZAIB039-06 | FJ583416 |
|                                          | HLC-12151 | TZAIB040-06 | FJ583417 |
|                                          | HLC-12152 | TZAIB041-06 | FJ583418 |
|                                          | HLC-12153 | TZAIB042-06 | FJ583419 |
|                                          | HLC-15229 | TZAIB899-07 | FJ583420 |
|                                          | HLC-15230 | TZAIB900-07 | FJ583421 |
|                                          | HLC-15231 | TZAIB901-07 | FJ583422 |
|                                          | HLC-15232 | TZAIB902-07 | FJ583423 |
| <i>Genicanthus melanospilos</i>          | HLC-11061 | TZAIC353-05 | FJ583424 |

|                                   |                              |             |             |          |
|-----------------------------------|------------------------------|-------------|-------------|----------|
|                                   | HLC-12135                    | TZAIB024-06 | FJ583425    |          |
|                                   | HLC-12280                    | TZAIC921-06 | FJ583426    |          |
|                                   | HLC-12339                    | TZAIB322-06 | FJ583427    |          |
| <i>Genicanthus watanabei</i>      | HLC-12425                    | TZAIB740-06 | FJ583558    |          |
| <i>Holacanthus ciliaris</i>       | HLC-12424                    | TZAIB739-06 | FJ583559    |          |
|                                   | HLC-12423                    | TZAIB738-06 | FJ583560    |          |
|                                   | HLC-13272                    | TZAIB649-06 | FJ583561    |          |
|                                   | HLC-13055                    | TZAIB432-06 | FJ583562    |          |
| <i>Holacanthus tricolor</i>       | HLC-11992                    | TZAIB257-06 | FJ583563    |          |
|                                   | HLC-11993                    | TZAIB258-06 | FJ583564    |          |
|                                   | HLC-11994                    | TZAIB259-06 | FJ583565    |          |
|                                   | HLC-11995                    | TZAIB260-06 | FJ583566    |          |
|                                   | HLC-11996                    | TZAIB261-06 | FJ583567    |          |
|                                   | HLC-15109                    | TZAIB792-07 | FJ583568    |          |
| <i>Pomacanthus annularis</i>      | HLC-12420                    | TZAIB744-06 | FJ583875    |          |
|                                   | HLC-12123                    | TZAIB012-06 | FJ583876    |          |
| <i>Pomacanthus imperator</i>      | HLC-11794                    | TZAIC732-06 | FJ583877    |          |
|                                   | HLC-11938                    | TZAIB203-06 | FJ583878    |          |
|                                   | HLC-12281                    | TZAIC922-06 | FJ583879    |          |
|                                   | HLC-11710                    | TZAIC642-06 | FJ583880    |          |
|                                   | HLC-11141                    | TZAIC433-05 | FJ583881    |          |
|                                   | HLC-10801                    | TZAIC101-05 | FJ583882    |          |
| <i>Pomacanthus navarchus</i>      | HLC-15226                    | TZAIB896-07 | FJ583883    |          |
| <i>Pomacanthus paru</i>           | HLC-12422                    | TZAIB745-06 | FJ583884    |          |
|                                   | HLC-13063                    | TZAIB440-06 | FJ583885    |          |
| <i>Pomacanthus semicirculatus</i> | HLC-11961                    | TZAIB226-06 | FJ583886    |          |
|                                   | HLC-12297                    | TZAIC938-06 | FJ583887    |          |
| <i>Pygoplites diacanthus</i>      | HLC-12391                    | TZAIB374-06 | FJ584045    |          |
|                                   | HLC-12030                    | TZAIB107-06 | FJ584046    |          |
|                                   | HLC-12031                    | TZAIB108-06 | FJ584047    |          |
|                                   | HLC-11066                    | TZAIC358-05 | FJ584048    |          |
| Family Pomacentridae              | <i>Abudefduf vaiigiensis</i> | HLC-10821   | TZAIC121-05 | FJ582646 |
|                                   | HLC-15040                    | TZAIB684-06 | FJ582645    |          |
| <i>Amphiprion akallopisos</i>     | HLC-13056                    | TZAIB433-06 | FJ582726    |          |
|                                   | HLC-13143                    | TZAIB520-06 | FJ582727    |          |
|                                   | HLC-12190                    | TZAIB079-06 | FJ582728    |          |
|                                   | HLC-15033                    | TZAIB747-06 | FJ582729    |          |
|                                   | HLC-15034                    | TZAIB748-06 | FJ582730    |          |
|                                   | HLC-15075                    | TZAIB749-06 | FJ582731    |          |
|                                   | HLC-13165                    | TZAIB542-06 | FJ582732    |          |
|                                   | HLC-15130                    | TZAIB812-07 | FJ582733    |          |
|                                   | HLC-11075                    | TZAIC367-05 | FJ582734    |          |
|                                   | HLC-11073                    | TZAIC365-05 | FJ582735    |          |
|                                   | HLC-11072                    | TZAIC364-05 | FJ582736    |          |
|                                   | HLC-11071                    | TZAIC363-05 | FJ582737    |          |
| <i>Amphiprion chrysoaster</i>     | HLC-12402                    | TZAIB385-06 | FJ582738    |          |
|                                   | HLC-11745                    | TZAIC683-06 | FJ582739    |          |
|                                   | HLC-12302                    | TZAIB285-06 | FJ582740    |          |
|                                   | HLC-12303                    | TZAIB286-06 | FJ582741    |          |
|                                   | HLC-12304                    | TZAIB287-06 | FJ582742    |          |
|                                   | HLC-12305                    | TZAIB288-06 | FJ582743    |          |
|                                   | HLC-12306                    | TZAIB289-06 | FJ582744    |          |
|                                   | HLC-11749                    | TZAIC687-06 | FJ582745    |          |
|                                   | HLC-11748                    | TZAIC686-06 | FJ582746    |          |
|                                   | HLC-11747                    | TZAIC685-06 | FJ582747    |          |
|                                   | HLC-11746                    | TZAIC684-06 | FJ582748    |          |
|                                   | HLC-10913                    | TZAIC213-05 | FJ582749    |          |
|                                   | HLC-10914                    | TZAIC214-05 | FJ582750    |          |
| <i>Amphiprion chrysopterus</i>    | HLC-11684                    | TZAIC616-06 | FJ582751    |          |
|                                   | HLC-11686                    | TZAIC618-06 | FJ582752    |          |
|                                   | HLC-11685                    | TZAIC617-06 | FJ582753    |          |
|                                   | HLC-11683                    | TZAIC615-06 | FJ582754    |          |
|                                   | HLC-11682                    | TZAIC614-06 | FJ582755    |          |
| <i>Amphiprion clarkii</i>         | HLC-11895                    | TZAIC833-06 | FJ582756    |          |
|                                   | HLC-10912                    | TZAIC212-05 | FJ582757    |          |
|                                   | HLC-10910                    | TZAIC210-05 | FJ582758    |          |
| <i>Amphiprion frenatus</i>        | HLC-11555                    | TZAIC487-06 | FJ582759    |          |
| <i>Amphiprion latifasciatus</i>   | HLC-10911                    | TZAIC211-05 | FJ582760    |          |
| <i>Amphiprion melanopus</i>       | HLC-11554                    | TZAIC486-06 | FJ582761    |          |
|                                   | HLC-10846                    | TZAIC146-05 | FJ582762    |          |
|                                   | HLC-10845                    | TZAIC145-05 | FJ582763    |          |
|                                   | HLC-10843                    | TZAIC143-05 | FJ582764    |          |
|                                   | HLC-12164                    | TZAIB053-06 | FJ582765    |          |
|                                   | HLC-12165                    | TZAIB054-06 | FJ582766    |          |
|                                   | HLC-12166                    | TZAIB055-06 | FJ582767    |          |
|                                   | HLC-12167                    | TZAIB056-06 | FJ582768    |          |
|                                   | HLC-12168                    | TZAIB057-06 | FJ582769    |          |
|                                   | HLC-11653                    | TZAIC585-06 | FJ582770    |          |
|                                   | HLC-11137                    | TZAIC429-05 | FJ582771    |          |

|                                |           |             |          |
|--------------------------------|-----------|-------------|----------|
|                                | HLC-10844 | TZAIC144-05 | FJ582772 |
|                                | HLC-10842 | TZAIC142-05 | FJ582773 |
| <i>Amphiprion nigripes</i>     | HLC-11570 | TZAIC502-06 | FJ582774 |
|                                | HLC-11123 | TZAIC415-05 | FJ582775 |
|                                | HLC-11121 | TZAIC413-05 | FJ582776 |
|                                | HLC-11122 | TZAIC414-05 | FJ582777 |
|                                | HLC-10774 | TZAIC074-05 | FJ582778 |
|                                | HLC-10775 | TZAIC075-05 | FJ582779 |
|                                | HLC-10772 | TZAIC072-05 | FJ582780 |
|                                | HLC-10773 | TZAIC073-05 | FJ582781 |
|                                | HLC-10776 | TZAIC076-05 | FJ582782 |
|                                | HLC-10921 | TZAIC221-05 | FJ582783 |
|                                | HLC-10920 | TZAIC220-05 | FJ582784 |
| <i>Amphiprion ocellaris</i>    | HLC-10909 | TZAIC209-05 | FJ582785 |
|                                | HLC-10770 | TZAIC070-05 | FJ582786 |
|                                | HLC-10767 | TZAIC067-05 | FJ582787 |
|                                | HLC-10768 | TZAIC068-05 | FJ582788 |
|                                | HLC-10769 | TZAIC069-05 | FJ582789 |
|                                | HLC-10771 | TZAIC071-05 | FJ582790 |
|                                | HLC-10905 | TZAIC205-05 | FJ582791 |
|                                | HLC-10908 | TZAIC208-05 | FJ582792 |
|                                | HLC-10906 | TZAIC206-05 | FJ582793 |
|                                | HLC-10907 | TZAIC207-05 | FJ582794 |
| <i>Amphiprion perideraion</i>  | HLC-12170 | TZAIB059-06 | FJ582795 |
|                                | HLC-12169 | TZAIB058-06 | FJ582796 |
|                                | HLC-12171 | TZAIB060-06 | FJ582797 |
|                                | HLC-12172 | TZAIB061-06 | FJ582798 |
|                                | HLC-12173 | TZAIB062-06 | FJ582799 |
|                                | HLC-11564 | TZAIC496-06 | FJ582800 |
|                                | HLC-11074 | TZAIC366-05 | FJ582801 |
|                                | HLC-10916 | TZAIC216-05 | FJ582802 |
|                                | HLC-10918 | TZAIC218-05 | FJ582803 |
|                                | HLC-10917 | TZAIC217-05 | FJ582804 |
|                                | HLC-10915 | TZAIC215-05 | FJ582805 |
|                                | HLC-10919 | TZAIC219-05 | FJ582806 |
| <i>Amphiprion polymnus</i>     | HLC-11583 | TZAIC515-06 | FJ582807 |
|                                | HLC-13296 | TZAIB750-06 | FJ582808 |
|                                | HLC-13297 | TZAIB751-06 | FJ582809 |
|                                | HLC-13298 | TZAIB752-06 | FJ582810 |
|                                | HLC-13299 | TZAIB753-06 | FJ582811 |
|                                | HLC-13300 | TZAIB754-06 | FJ582812 |
|                                | HLC-10839 | TZAIC139-05 | FJ582813 |
| <i>Amphiprion sandaracinos</i> | HLC-11563 | TZAIC495-06 | FJ582814 |
|                                | HLC-11562 | TZAIC494-06 | FJ582815 |
|                                | HLC-11561 | TZAIC493-06 | FJ582816 |
| <i>Amphiprion sebae</i>        | HLC-10836 | TZAIC136-05 | FJ582817 |
|                                | HLC-10834 | TZAIC134-05 | FJ582818 |
|                                | HLC-10835 | TZAIC135-05 | FJ582819 |
|                                | HLC-10832 | TZAIC132-05 | FJ582820 |
|                                | HLC-13044 | TZAIB421-06 | FJ582821 |
|                                | HLC-13045 | TZAIB422-06 | FJ582822 |
|                                | HLC-13046 | TZAIB423-06 | FJ582823 |
|                                | HLC-13292 | TZAIB669-06 | FJ582824 |
|                                | HLC-11894 | TZAIC832-06 | FJ582825 |
|                                | HLC-12242 | TZAIC883-06 | FJ582826 |
|                                | HLC-12241 | TZAIC882-06 | FJ582827 |
|                                | HLC-12240 | TZAIC881-06 | FJ582828 |
|                                | HLC-12239 | TZAIC880-06 | FJ582829 |
|                                | HLC-10833 | TZAIC133-05 | FJ582830 |
| <i>Chromis tripteoralis</i>    | HLC-11602 | TZAIC534-06 | FJ583145 |
| <i>Chromis caerulea</i>        | HLC-10922 | TZAIC222-05 | FJ583146 |
|                                | HLC-10924 | TZAIC224-05 | FJ583147 |
|                                | HLC-10926 | TZAIC226-05 | FJ583148 |
| <i>Chromis cyanea</i>          | HLC-11979 | TZAIB244-06 | FJ583149 |
|                                | HLC-11975 | TZAIB240-06 | FJ583150 |
|                                | HLC-11976 | TZAIB241-06 | FJ583151 |
|                                | HLC-11977 | TZAIB242-06 | FJ583152 |
|                                | HLC-11978 | TZAIB243-06 | FJ583153 |
| <i>Chromis insolata</i>        | HLC-13050 | TZAIB427-06 | FJ583154 |
|                                | HLC-13051 | TZAIB428-06 | FJ583155 |
|                                | HLC-13052 | TZAIB429-06 | FJ583156 |
|                                | HLC-13053 | TZAIB430-06 | FJ583157 |
| <i>Chromis margaritifer</i>    | HLC-12174 | TZAIB063-06 | FJ583158 |
|                                | HLC-12175 | TZAIB064-06 | FJ583159 |
|                                | HLC-12176 | TZAIB065-06 | FJ583160 |
|                                | HLC-12177 | TZAIB066-06 | FJ583161 |
|                                | HLC-12178 | TZAIB067-06 | FJ583162 |
| <i>Chromis viridis</i>         | HLC-11601 | TZAIC533-06 | FJ583163 |
|                                | HLC-11600 | TZAIC532-06 | FJ583164 |

|                                          |           |             |          |
|------------------------------------------|-----------|-------------|----------|
|                                          | HLC-11599 | TZAIC531-06 | FJ583165 |
|                                          | HLC-11598 | TZAIC530-06 | FJ583166 |
|                                          | HLC-10925 | TZAIC225-05 | FJ583167 |
| <i>Chrysiptera cyanea</i>                | HLC-10752 | TZAIC052-05 | FJ583168 |
|                                          | HLC-11944 | TZAIB209-06 | FJ583169 |
|                                          | HLC-11941 | TZAIB206-06 | FJ583170 |
|                                          | HLC-11942 | TZAIB207-06 | FJ583171 |
|                                          | HLC-11943 | TZAIB208-06 | FJ583172 |
|                                          | HLC-11945 | TZAIB210-06 | FJ583173 |
|                                          | HLC-10754 | TZAIC054-05 | FJ583174 |
|                                          | HLC-11637 | TZAIC569-06 | FJ583175 |
|                                          | HLC-11636 | TZAIC568-06 | FJ583176 |
|                                          | HLC-11635 | TZAIC567-06 | FJ583177 |
|                                          | HLC-11634 | TZAIC566-06 | FJ583178 |
|                                          | HLC-11633 | TZAIC565-06 | FJ583179 |
|                                          | HLC-10756 | TZAIC056-05 | FJ583180 |
|                                          | HLC-10755 | TZAIC055-05 | FJ583181 |
|                                          | HLC-10753 | TZAIC053-05 | FJ583182 |
| <i>Chrysiptera galba</i>                 | HLC-12183 | TZAIB072-06 | FJ583183 |
|                                          | HLC-12179 | TZAIB068-06 | FJ583184 |
|                                          | HLC-12180 | TZAIB069-06 | FJ583185 |
|                                          | HLC-12181 | TZAIB070-06 | FJ583186 |
|                                          | HLC-12182 | TZAIB071-06 | FJ583187 |
| <i>Chrysiptera parasema</i>              | HLC-10748 | TZAIC048-05 | FJ583188 |
|                                          | HLC-10747 | TZAIC047-05 | FJ583189 |
|                                          | HLC-10751 | TZAIC051-05 | FJ583190 |
|                                          | HLC-10750 | TZAIC050-05 | FJ583191 |
|                                          | HLC-10749 | TZAIC049-05 | FJ583192 |
| <i>Chrysiptera rex</i>                   | HLC-10837 | TZAIC137-05 | FJ583193 |
|                                          | HLC-11617 | TZAIC549-06 | FJ583194 |
|                                          | HLC-11616 | TZAIC548-06 | FJ583195 |
|                                          | HLC-10838 | TZAIC138-05 | FJ583196 |
| <i>Chrysiptera starcki</i>               | HLC-13253 | TZAIB630-06 | FJ583197 |
|                                          | HLC-12154 | TZAIB043-06 | FJ583198 |
|                                          | HLC-13255 | TZAIB632-06 | FJ583199 |
|                                          | HLC-13254 | TZAIB631-06 | FJ583200 |
|                                          | HLC-13252 | TZAIB629-06 | FJ583201 |
|                                          | HLC-11644 | TZAIC576-06 | FJ583202 |
|                                          | HLC-11643 | TZAIC575-06 | FJ583203 |
| <i>Chrysiptera talboti</i>               | HLC-11826 | TZAIC764-06 | FJ583204 |
|                                          | HLC-11827 | TZAIC765-06 | FJ583205 |
|                                          | HLC-11824 | TZAIC762-06 | FJ583206 |
|                                          | HLC-11823 | TZAIC761-06 | FJ583207 |
| <i>Chrysiptera taupou</i>                | HLC-11146 | TZAIC438-05 | FJ583208 |
|                                          | HLC-11147 | TZAIC439-05 | FJ583209 |
|                                          | HLC-11148 | TZAIC440-05 | FJ583210 |
|                                          | HLC-11149 | TZAIC441-05 | FJ583211 |
|                                          | HLC-10904 | TZAIC204-05 | FJ583212 |
| <i>Dascyllus aruanus</i>                 | HLC-10829 | TZAIC129-05 | FJ583321 |
|                                          | HLC-10830 | TZAIC130-05 | FJ583322 |
|                                          | HLC-10828 | TZAIC128-05 | FJ583323 |
|                                          | HLC-10831 | TZAIC131-05 | FJ583324 |
| <i>Dascyllus flavicaudus</i>             | HLC-11875 | TZAIC813-06 | FJ583325 |
| <i>Dascyllus melanurus</i>               | HLC-11956 | TZAIB221-06 | FJ583326 |
|                                          | HLC-11957 | TZAIB222-06 | FJ583327 |
|                                          | HLC-11958 | TZAIB223-06 | FJ583328 |
|                                          | HLC-11959 | TZAIB224-06 | FJ583329 |
|                                          | HLC-11960 | TZAIB225-06 | FJ583330 |
| <i>Dascyllus reticulatus</i>             | HLC-11877 | TZAIC815-06 | FJ583331 |
|                                          | HLC-11874 | TZAIC812-06 | FJ583332 |
| <i>Dascyllus trimaculatus</i>            | HLC-11042 | TZAIC334-05 | FJ583333 |
|                                          | HLC-11044 | TZAIC336-05 | FJ583334 |
|                                          | HLC-11043 | TZAIC335-05 | FJ583335 |
|                                          | HLC-11041 | TZAIC333-05 | FJ583336 |
|                                          | HLC-11045 | TZAIC337-05 | FJ583337 |
|                                          | HLC-11064 | TZAIC356-05 | FJ583338 |
| <i>Dischistodus prosopotaenia</i>        | HLC-12214 | TZAIC855-06 | FJ583365 |
| <i>Dischistodus pseudochrysopoecilus</i> | HLC-12215 | TZAIC856-06 | FJ583366 |
|                                          | HLC-12216 | TZAIC857-06 | FJ583367 |
|                                          | HLC-12213 | TZAIC854-06 | FJ583368 |
|                                          | HLC-12212 | TZAIC853-06 | FJ583369 |
| <i>Microspathodon chrysurus</i>          | HLC-12015 | TZAIB280-06 | FJ583659 |
|                                          | HLC-12013 | TZAIB278-06 | FJ583660 |
|                                          | HLC-12014 | TZAIB279-06 | FJ583661 |
|                                          | HLC-12016 | TZAIB281-06 | FJ583662 |
| <i>Neoglyphidodon melas</i>              | HLC-10899 | TZAIC199-05 | FJ583724 |
|                                          | HLC-10901 | TZAIC201-05 | FJ583725 |
|                                          | HLC-10902 | TZAIC202-05 | FJ583726 |
|                                          | HLC-10900 | TZAIC200-05 | FJ583727 |

|                        |                                   |           |             |          |
|------------------------|-----------------------------------|-----------|-------------|----------|
|                        |                                   | HLC-10903 | TZAIC203-05 | FJ583728 |
|                        | <i>Neoglyphidodon nigroris</i>    | HLC-12034 | TZAIB111-06 | FJ583729 |
|                        |                                   | HLC-12035 | TZAIB112-06 | FJ583730 |
|                        |                                   | HLC-12036 | TZAIB113-06 | FJ583731 |
|                        |                                   | HLC-12037 | TZAIB114-06 | FJ583732 |
|                        |                                   | HLC-12038 | TZAIB115-06 | FJ583733 |
|                        | <i>Neoglyphidodon oxyodon</i>     | HLC-10823 | TZAIC123-05 | FJ583734 |
|                        |                                   | HLC-10825 | TZAIC125-05 | FJ583735 |
|                        |                                   | HLC-10822 | TZAIC122-05 | FJ583736 |
|                        |                                   | HLC-10826 | TZAIC126-05 | FJ583737 |
|                        |                                   | HLC-10824 | TZAIC124-05 | FJ583738 |
|                        | <i>Pomacentrus alleni</i>         | HLC-12194 | TZAIB083-06 | FJ583888 |
|                        |                                   | HLC-12196 | TZAIB085-06 | FJ583889 |
|                        |                                   | HLC-12192 | TZAIB081-06 | FJ583890 |
|                        |                                   | HLC-12193 | TZAIB082-06 | FJ583891 |
|                        |                                   | HLC-12195 | TZAIB084-06 | FJ583892 |
|                        | <i>Pomacentrus caeruleus</i>      | HLC-11754 | TZAIC692-06 | FJ583893 |
|                        |                                   | HLC-11753 | TZAIC691-06 | FJ583894 |
|                        |                                   | HLC-11752 | TZAIC690-06 | FJ583895 |
|                        |                                   | HLC-11751 | TZAIC689-06 | FJ583896 |
|                        |                                   | HLC-11750 | TZAIC688-06 | FJ583897 |
|                        | <i>Pomacentrus coelestis</i>      | HLC-11819 | TZAIC757-06 | FJ583898 |
|                        |                                   | HLC-11818 | TZAIC756-06 | FJ583899 |
|                        |                                   | HLC-11817 | TZAIC755-06 | FJ583900 |
|                        |                                   | HLC-11816 | TZAIC754-06 | FJ583901 |
|                        | <i>Pomacentrus moluccensis</i>    | HLC-11082 | TZAIC374-05 | FJ583902 |
|                        |                                   | HLC-11822 | TZAIC760-06 | FJ583903 |
|                        |                                   | HLC-11821 | TZAIC759-06 | FJ583904 |
|                        |                                   | HLC-11157 | TZAIC449-05 | FJ583905 |
|                        |                                   | HLC-11081 | TZAIC373-05 | FJ583906 |
|                        |                                   | HLC-11080 | TZAIC372-05 | FJ583907 |
|                        | <i>Pomacentrus nagasakiensis</i>  | HLC-12225 | TZAIC866-06 | FJ583908 |
|                        |                                   | HLC-12224 | TZAIC865-06 | FJ583909 |
|                        |                                   | HLC-12223 | TZAIC864-06 | FJ583910 |
|                        |                                   | HLC-12222 | TZAIC863-06 | FJ583911 |
|                        | <i>Premnas biaculeatus</i>        | HLC-11690 | TZAIC622-06 | FJ583912 |
|                        |                                   | HLC-11766 | TZAIC704-06 | FJ583913 |
|                        |                                   | HLC-11689 | TZAIC621-06 | FJ583914 |
|                        |                                   | HLC-11688 | TZAIC620-06 | FJ583915 |
|                        |                                   | HLC-11687 | TZAIC619-06 | FJ583916 |
|                        |                                   | HLC-11127 | TZAIC419-05 | FJ583917 |
|                        |                                   | HLC-11125 | TZAIC417-05 | FJ583918 |
|                        |                                   | HLC-11128 | TZAIC420-05 | FJ583919 |
|                        |                                   | HLC-11126 | TZAIC418-05 | FJ583920 |
|                        |                                   | HLC-11069 | TZAIC361-05 | FJ583921 |
| Family Pseudochromidae | <i>Labracinus cyclophthalmus</i>  | HLC-12024 | TZAIB101-06 | FJ583584 |
|                        |                                   | HLC-11729 | TZAIC667-06 | FJ583585 |
|                        | <i>Labracinus lineatus</i>        | HLC-10746 | TZAIC046-05 | FJ583586 |
|                        | <i>Pseudochromis diadema</i>      | HLC-12042 | TZAIB119-06 | FJ583978 |
|                        |                                   | HLC-12041 | TZAIB118-06 | FJ583979 |
|                        | <i>Pseudochromis fuscus</i>       | HLC-11661 | TZAIC593-06 | FJ583980 |
|                        |                                   | HLC-11660 | TZAIC592-06 | FJ583981 |
|                        | <i>Pseudochromis paccagnellae</i> | HLC-12189 | TZAIB078-06 | FJ583982 |
|                        |                                   | HLC-10985 | TZAIC465-05 | FJ583983 |
|                        |                                   | HLC-10986 | TZAIC466-05 | FJ583984 |
|                        |                                   | HLC-10987 | TZAIC467-05 | FJ583985 |
|                        | <i>Pseudochromis porphyreus</i>   | HLC-11053 | TZAIC345-05 | FJ583986 |
|                        |                                   | HLC-11054 | TZAIC346-05 | FJ583987 |
|                        |                                   | HLC-11051 | TZAIC343-05 | FJ583988 |
|                        |                                   | HLC-11052 | TZAIC344-05 | FJ583989 |
|                        |                                   | HLC-11055 | TZAIC347-05 | FJ583990 |
| Family Scaridae        | <i>Leptoscarus vaiigiensis</i>    | HLC-12386 | TZAIB369-06 | FJ583627 |
|                        | <i>Scarus iseri</i>               | HLC-12100 | TZAIB177-06 | FJ584081 |
|                        |                                   | HLC-12101 | TZAIB178-06 | FJ584082 |
|                        | <i>Scarus vetula</i>              | HLC-15210 | TZAIB880-07 | FJ584083 |
|                        |                                   | HLC-11939 | TZAIB204-06 | FJ584084 |
|                        |                                   | HLC-11940 | TZAIB205-06 | FJ584085 |
| Family Scatophagidae   | <i>Scatophagus argus</i>          | HLC-15211 | TZAIB881-07 | FJ584086 |
|                        |                                   | HLC-15212 | TZAIB882-07 | FJ584087 |
|                        |                                   | HLC-15213 | TZAIB883-07 | FJ584088 |
|                        |                                   | HLC-15214 | TZAIB884-07 | FJ584089 |
|                        |                                   | HLC-11039 | TZAIC331-05 | FJ584090 |
| Family Sciaenidae      | <i>Equetus lanceolatus</i>        | HLC-11980 | TZAIB245-06 | FJ583400 |
|                        |                                   | HLC-13119 | TZAIB496-06 | FJ583401 |
|                        | <i>Equetus punctatus</i>          | HLC-11981 | TZAIB246-06 | FJ583402 |
|                        |                                   | HLC-15057 | TZAIB755-06 | FJ583403 |
|                        |                                   | HLC-15058 | TZAIB756-06 | FJ583404 |
|                        | <i>Pareques acuminatus</i>        | HLC-12358 | TZAIB341-06 | FJ583830 |
|                        |                                   | HLC-13294 | TZAIB671-06 | FJ583831 |



|                   |                                    |           |             |          |
|-------------------|------------------------------------|-----------|-------------|----------|
| Family Serranidae | <i>Cephalopholis formosa</i>       | HLC-12384 | TZAIB367-06 | FJ583003 |
|                   |                                    | HLC-15117 | TZAIB799-07 | FJ583004 |
|                   | <i>Cephalopholis fulva</i>         | HLC-13111 | TZAIB488-06 | FJ583005 |
|                   |                                    | HLC-13112 | TZAIB489-06 | FJ583006 |
|                   |                                    | HLC-13113 | TZAIB490-06 | FJ583007 |
|                   |                                    | HLC-13114 | TZAIB491-06 | FJ583008 |
|                   |                                    | HLC-13115 | TZAIB492-06 | FJ583009 |
|                   | <i>Cephalopholis leopardus</i>     | HLC-13138 | TZAIB515-06 | FJ583010 |
|                   | <i>Cephalopholis miniata</i>       | HLC-15187 | TZAIB857-07 | FJ583011 |
|                   | <i>Cephalopholis urodeta</i>       | HLC-12146 | TZAIB035-06 | FJ583012 |
|                   |                                    | HLC-12372 | TZAIB355-06 | FJ583013 |
|                   |                                    | HLC-12373 | TZAIB356-06 | FJ583014 |
|                   |                                    | HLC-13139 | TZAIB516-06 | FJ583015 |
|                   | <i>Cromileptes altivelis</i>       | HLC-11835 | TZAIC773-06 | FJ583275 |
|                   |                                    | HLC-11834 | TZAIC772-06 | FJ583276 |
|                   |                                    | HLC-11833 | TZAIC771-06 | FJ583277 |
|                   |                                    | HLC-11832 | TZAIC770-06 | FJ583278 |
|                   |                                    | HLC-11828 | TZAIC766-06 | FJ583279 |
|                   | <i>Epinephelus adscensionis</i>    | HLC-13067 | TZAIB444-06 | FJ583396 |
|                   | <i>Epinephelus ongus</i>           | HLC-12321 | TZAIB304-06 | FJ583397 |
|                   |                                    | HLC-13117 | TZAIB494-06 | FJ583398 |
|                   |                                    | HLC-13118 | TZAIB495-06 | FJ583399 |
|                   | <i>Hypoplectrus puella</i>         | HLC-13033 | TZAIB410-06 | FJ583577 |
|                   |                                    | HLC-13036 | TZAIB413-06 | FJ583578 |
|                   |                                    | HLC-13037 | TZAIB414-06 | FJ583579 |
|                   |                                    | HLC-13038 | TZAIB415-06 | FJ583580 |
|                   |                                    | HLC-13175 | TZAIB552-06 | FJ583581 |
|                   |                                    | HLC-13207 | TZAIB584-06 | FJ583582 |
|                   | <i>Mycteroperca interstitialis</i> | HLC-13116 | TZAIB493-06 | FJ583668 |
|                   | <i>Nemanthias carberryi</i>        | HLC-12342 | TZAIB325-06 | FJ583695 |
|                   |                                    | HLC-10988 | TZAIC468-05 | FJ583696 |
|                   |                                    | HLC-10989 | TZAIC469-05 | FJ583697 |
|                   |                                    | HLC-10992 | TZAIC284-05 | FJ583698 |
|                   |                                    | HLC-10991 | TZAIC283-05 | FJ583699 |
|                   |                                    | HLC-10990 | TZAIC470-05 | FJ583700 |
|                   | <i>Plectropomus maculatus</i>      | HLC-13064 | TZAIB441-06 | FJ583869 |
|                   | <i>Pseudanthias huchtii</i>        | HLC-12136 | TZAIB025-06 | FJ583925 |
|                   | <i>Pseudanthias lori</i>           | HLC-13101 | TZAIB478-06 | FJ583926 |
|                   |                                    | HLC-13102 | TZAIB479-06 | FJ583927 |
|                   |                                    | HLC-13103 | TZAIB480-06 | FJ583928 |
|                   |                                    | HLC-13104 | TZAIB481-06 | FJ583929 |
|                   |                                    | HLC-13105 | TZAIB482-06 | FJ583930 |
|                   | <i>Pseudanthias pascalus</i>       | HLC-12312 | TZAIB295-06 | FJ583931 |
|                   |                                    | HLC-12313 | TZAIB296-06 | FJ583932 |
|                   |                                    | HLC-12314 | TZAIB297-06 | FJ583933 |
|                   | <i>Pseudanthias pleurotaenia</i>   | HLC-10981 | TZAIC281-05 | FJ583934 |
|                   |                                    | HLC-11626 | TZAIC558-06 | FJ583935 |
|                   |                                    | HLC-11624 | TZAIC556-06 | FJ583936 |
|                   |                                    | HLC-10766 | TZAIC066-05 | FJ583937 |
|                   |                                    | HLC-10765 | TZAIC065-05 | FJ583938 |
|                   | <i>Pseudanthias squamipinnis</i>   | HLC-11694 | TZAIC626-06 | FJ583939 |
|                   |                                    | HLC-12093 | TZAIB170-06 | FJ583940 |
|                   |                                    | HLC-12012 | TZAIB277-06 | FJ583941 |
|                   |                                    | HLC-12094 | TZAIB171-06 | FJ583942 |
|                   |                                    | HLC-12095 | TZAIB172-06 | FJ583943 |
|                   |                                    | HLC-12096 | TZAIB173-06 | FJ583944 |
|                   |                                    | HLC-15233 | TZAIB903-07 | FJ583945 |
|                   |                                    | HLC-15234 | TZAIB904-07 | FJ583946 |
|                   |                                    | HLC-15235 | TZAIB905-07 | FJ583947 |
|                   |                                    | HLC-11723 | TZAIC655-06 | FJ583948 |
|                   |                                    | HLC-11719 | TZAIC651-06 | FJ583949 |
|                   |                                    | HLC-11718 | TZAIC650-06 | FJ583950 |
|                   |                                    | HLC-11695 | TZAIC627-06 | FJ583951 |
|                   |                                    | HLC-11692 | TZAIC624-06 | FJ583952 |
|                   |                                    | HLC-11788 | TZAIC726-06 | FJ583953 |
|                   |                                    | HLC-11678 | TZAIC610-06 | FJ583954 |
|                   |                                    | HLC-11641 | TZAIC573-06 | FJ583955 |
|                   |                                    | HLC-11640 | TZAIC572-06 | FJ583956 |
|                   | <i>Pseudanthias truncatus</i>      | HLC-11625 | TZAIC557-06 | FJ583957 |
|                   |                                    | HLC-10764 | TZAIC064-05 | FJ583958 |
|                   |                                    | HLC-10763 | TZAIC063-05 | FJ583959 |
|                   |                                    | HLC-10762 | TZAIC062-05 | FJ583960 |
|                   | <i>Serranocirrhites latus</i>      | HLC-11955 | TZAIB220-06 | FJ584094 |
|                   |                                    | HLC-10820 | TZAIC120-05 | FJ584095 |
|                   |                                    | HLC-11954 | TZAIB219-06 | FJ584096 |
|                   |                                    | HLC-11133 | TZAIC425-05 | FJ584097 |
|                   |                                    | HLC-11134 | TZAIC426-05 | FJ584098 |
|                   | <i>Serranus baldwini</i>           | HLC-12348 | TZAIB331-06 | FJ584099 |
|                   |                                    | HLC-12349 | TZAIB332-06 | FJ584100 |

|                         |  |                                  |             |             |          |
|-------------------------|--|----------------------------------|-------------|-------------|----------|
|                         |  |                                  | HLC-12350   | TZAIB333-06 | FJ584101 |
|                         |  |                                  | HLC-12351   | TZAIB334-06 | FJ584102 |
|                         |  |                                  | HLC-13081   | TZAIB458-06 | FJ584103 |
|                         |  | <i>Serranus tabacarius</i>       | HLC-13202   | TZAIB579-06 | FJ584104 |
|                         |  | <i>Serranus tigrinus</i>         | HLC-12337   | TZAIB320-06 | FJ584105 |
|                         |  |                                  | HLC-12338   | TZAIB321-06 | FJ584106 |
|                         |  |                                  | HLC-13144   | TZAIB521-06 | FJ584107 |
|                         |  | <i>Variola albimarginata</i>     | HLC-12364   | TZAIB347-06 | FJ584241 |
|                         |  | <i>Variola louti</i>             | HLC-15129   | TZAIB811-07 | FJ584242 |
| Family Siganidae        |  | <i>Siganus puellus</i>           | HLC-13026   | TZAIB403-06 | FJ584108 |
|                         |  | <i>Siganus virgatus</i>          | HLC-13284   | TZAIB661-06 | FJ584109 |
|                         |  |                                  | HLC-15107   | TZAIB790-07 | FJ584110 |
|                         |  |                                  | HLC-15108   | TZAIB791-07 | FJ584111 |
|                         |  |                                  | HLC-15185   | TZAIB855-07 | FJ584112 |
|                         |  |                                  | HLC-10743   | TZAIC043-05 | FJ584113 |
|                         |  | <i>Siganus vulpinus</i>          | HLC-10741   | TZAIC041-05 | FJ584114 |
|                         |  |                                  | HLC-10742   | TZAIC042-05 | FJ584115 |
|                         |  |                                  | HLC-10740   | TZAIC040-05 | FJ584116 |
|                         |  |                                  | HLC-10738   | TZAIC038-05 | FJ584117 |
|                         |  |                                  | HLC-10739   | TZAIC039-05 | FJ584118 |
| Family Sphyrænidae      |  | <i>Sphyræna barracuda</i>        | HLC-15190   | TZAIB860-07 | FJ584124 |
|                         |  |                                  | HLC-15191   | TZAIB861-07 | FJ584125 |
| Family Zanclusidae      |  | <i>Zanclus cornutus</i>          | HLC-11758   | TZAIC696-06 | FJ584250 |
|                         |  |                                  | HLC-15015   | TZAIB757-06 | FJ584251 |
|                         |  |                                  | HLC-15016   | TZAIB758-06 | FJ584252 |
|                         |  |                                  | HLC-15017   | TZAIB759-06 | FJ584253 |
|                         |  |                                  | HLC-15018   | TZAIB760-06 | FJ584254 |
|                         |  |                                  | HLC-15019   | TZAIB761-06 | FJ584255 |
|                         |  |                                  | HLC-11760   | TZAIC698-06 | FJ584256 |
|                         |  |                                  | HLC-11759   | TZAIC697-06 | FJ584257 |
|                         |  |                                  | HLC-10798   | TZAIC098-05 | FJ584258 |
|                         |  |                                  | HLC-10797   | TZAIC097-05 | FJ584259 |
|                         |  |                                  | HLC-10795   | TZAIC095-05 | FJ584260 |
|                         |  |                                  | HLC-10796   | TZAIC096-05 | FJ584261 |
|                         |  |                                  | HLC-10799   | TZAIC099-05 | FJ584262 |
| Order Pleuronectiformes |  |                                  |             |             |          |
| Family Achiridae        |  | <i>Achirus lineatus</i>          | HLC-12106   | TZAIB183-06 | FJ582703 |
| Order Scorpaeniformes   |  |                                  |             |             |          |
| Family Dactylopteridae  |  | <i>Dactyloptena orientalis</i>   | HLC-12232   | TZAIC873-06 | FJ583311 |
|                         |  |                                  | HLC-12236   | TZAIC877-06 | FJ583312 |
|                         |  |                                  | HLC-12235   | TZAIC876-06 | FJ583313 |
|                         |  |                                  | HLC-12234   | TZAIC875-06 | FJ583314 |
|                         |  |                                  | HLC-12233   | TZAIC874-06 | FJ583315 |
| Family Scorpaenidae     |  | <i>Dendrochirus biocellatus</i>  | HLC-11084   | TZAIC376-05 | FJ583342 |
|                         |  | <i>Dendrochirus brachypterus</i> | HLC-12204   | TZAIB093-06 | FJ583343 |
|                         |  |                                  | HLC-13219   | TZAIB596-06 | FJ583344 |
|                         |  |                                  | HLC-13220   | TZAIB597-06 | FJ583345 |
|                         |  |                                  | HLC-13221   | TZAIB598-06 | FJ583346 |
|                         |  |                                  | HLC-13222   | TZAIB599-06 | FJ583347 |
|                         |  | <i>Dendrochirus zebra</i>        | HLC-11610   | TZAIC542-06 | FJ583348 |
|                         |  |                                  | HLC-12203   | TZAIB092-06 | FJ583349 |
|                         |  |                                  | HLC-13293   | TZAIB670-06 | FJ583350 |
|                         |  |                                  | HLC-12291   | TZAIC932-06 | FJ583351 |
|                         |  |                                  | HLC-12290   | TZAIC931-06 | FJ583352 |
|                         |  |                                  | HLC-TSZ-011 | TZAIC011-05 | FJ583353 |
|                         |  |                                  | HLC-TSZ-012 | TZAIC012-05 | FJ583354 |
|                         |  | <i>Pterois andover</i>           | HLC-11569   | TZAIC501-06 | FJ584016 |
|                         |  | <i>Pterois antennata</i>         | HLC-13212   | TZAIB589-06 | FJ584017 |
|                         |  |                                  | HLC-13213   | TZAIB590-06 | FJ584018 |
|                         |  |                                  | HLC-15224   | TZAIB894-07 | FJ584019 |
|                         |  |                                  | HLC-15225   | TZAIB895-07 | FJ584020 |
|                         |  |                                  | HLC-12296   | TZAIC937-06 | FJ584021 |
|                         |  |                                  | HLC-12295   | TZAIC936-06 | FJ584022 |
|                         |  |                                  | HLC-12294   | TZAIC935-06 | FJ584023 |
|                         |  |                                  | HLC-11568   | TZAIC500-06 | FJ584024 |
|                         |  |                                  | HLC-11151   | TZAIC443-05 | FJ584025 |
|                         |  | <i>Pterois miles</i>             | HLC-12395   | TZAIB378-06 | FJ584026 |
|                         |  |                                  | HLC-12394   | TZAIB377-06 | FJ584027 |
|                         |  |                                  | HLC-12138   | TZAIB027-06 | FJ584028 |
|                         |  |                                  | HLC-11859   | TZAIC797-06 | FJ584029 |
|                         |  |                                  | HLC-12293   | TZAIC934-06 | FJ584030 |
|                         |  |                                  | HLC-12292   | TZAIC933-06 | FJ584031 |
|                         |  |                                  | HLC-TSZ-014 | TZAIC014-05 | FJ584032 |
|                         |  |                                  | HLC-TSZ-016 | TZAIC016-05 | FJ584033 |
|                         |  |                                  | HLC-TSZ-015 | TZAIC015-05 | FJ584034 |
|                         |  | <i>Pterois mombasae</i>          | HLC-11933   | TZAIB198-06 | FJ584035 |
|                         |  |                                  | HLC-11931   | TZAIB196-06 | FJ584036 |
|                         |  |                                  | HLC-11932   | TZAIB197-06 | FJ584037 |
|                         |  |                                  | HLC-TSZ-009 | TZAIC009-05 | FJ584038 |

|                         |                                |                                       |             |             |          |
|-------------------------|--------------------------------|---------------------------------------|-------------|-------------|----------|
|                         |                                | HLC-TSZ-010                           | TZAIC010-05 | FJ584039    |          |
|                         | <i>Pterois volitans</i>        | HLC-13089                             | TZAIB466-06 | FJ584040    |          |
|                         |                                | HLC-15005                             | TZAIB691-06 | FJ584041    |          |
|                         |                                | HLC-15072                             | TZAIB692-06 | FJ584042    |          |
|                         |                                | HLC-15128                             | TZAIB810-07 | FJ584043    |          |
|                         |                                | HLC-12264                             | TZAIC905-06 | FJ584044    |          |
|                         | <i>Scorpaena brasiliensis</i>  | HLC-12049                             | TZAIB126-06 | FJ584091    |          |
|                         |                                | HLC-12285                             | TZAIC926-06 | FJ584092    |          |
|                         | <i>Taenianotus triacanthus</i> | HLC-12369                             | TZAIB352-06 | FJ584154    |          |
|                         |                                | HLC-13280                             | TZAIB657-06 | FJ584155    |          |
|                         |                                | HLC-13281                             | TZAIB658-06 | FJ584156    |          |
|                         |                                | HLC-13027                             | TZAIB404-06 | FJ584157    |          |
|                         |                                | HLC-13040                             | TZAIB417-06 | FJ584158    |          |
|                         |                                | HLC-15087                             | TZAIB693-06 | FJ584159    |          |
|                         |                                | HLC-13201                             | TZAIB578-06 | FJ584160    |          |
|                         |                                | HLC-13215                             | TZAIB592-06 | FJ584161    |          |
|                         |                                | HLC-13216                             | TZAIB593-06 | FJ584162    |          |
|                         | Family Synanceiidae            | HLC-13203                             | TZAIB580-06 | FJ584136    |          |
|                         | <i>Synanceia verrucosa</i>     | HLC-12130                             | TZAIB019-06 | FJ583922    |          |
|                         | Family Triglidae               | <i>Prionotus sp.</i>                  | HLC-12090   | TZAIB167-06 | FJ583923 |
|                         | <i>Prionotus ophryas</i>       | HLC-12091                             | TZAIB168-06 | FJ583924    |          |
| Order Syngnathiformes   |                                |                                       |             |             |          |
|                         | Family Aulostomidae            | <i>Aulostomus chinensis</i>           | HLC-13062   | TZAIB439-06 | FJ582892 |
|                         | Family Syngnathidae            | <i>Cosmocampus elucens</i>            | HLC-12288   | TZAIC929-06 | FJ583271 |
|                         |                                |                                       | HLC-12287   | TZAIC928-06 | FJ583272 |
|                         |                                |                                       | HLC-12238   | TZAIC879-06 | FJ583273 |
|                         |                                |                                       | HLC-12237   | TZAIC878-06 | FJ583274 |
|                         |                                | <i>Doryrhamphus dactyliophorus</i>    | HLC-11925   | TZAIB190-06 | FJ583370 |
|                         |                                |                                       | HLC-11926   | TZAIB191-06 | FJ583371 |
|                         |                                |                                       | HLC-11927   | TZAIB192-06 | FJ583372 |
|                         |                                |                                       | HLC-13034   | TZAIB411-06 | FJ583373 |
|                         |                                |                                       | HLC-11018   | TZAIC310-05 | FJ583374 |
|                         |                                | <i>Doryrhamphus pessuliferus</i>      | HLC-12300   | TZAIB283-06 | FJ583375 |
|                         |                                |                                       | HLC-12318   | TZAIB301-06 | FJ583376 |
|                         |                                |                                       | HLC-12319   | TZAIB302-06 | FJ583377 |
|                         |                                | <i>Hippocampus kuda</i>               | HLC-12089   | TZAIB166-06 | FJ583550 |
|                         |                                |                                       | HLC-11773   | TZAIC711-06 | FJ583551 |
|                         |                                |                                       | HLC-12284   | TZAIC925-06 | FJ583552 |
|                         |                                |                                       | HLC-12283   | TZAIC924-06 | FJ583553 |
| Order Tetraodontiformes |                                |                                       |             |             |          |
|                         | Family Balistidae              | <i>Balistapus undulatus</i>           | HLC-12320   | TZAIB303-06 | FJ582893 |
|                         |                                | <i>Balistes capricus</i>              | HLC-15135   | TZAIB817-07 | FJ582894 |
|                         |                                | <i>Balistoides conspicillum</i>       | HLC-11974   | TZAIB239-06 | FJ582895 |
|                         |                                |                                       | HLC-11571   | TZAIC503-06 | FJ582896 |
|                         |                                |                                       | HLC-11145   | TZAIC437-05 | FJ582897 |
|                         |                                |                                       | HLC-11040   | TZAIC332-05 | FJ582898 |
|                         |                                | <i>Melichthys indicus</i>             | HLC-11717   | TZAIC649-06 | FJ583651 |
|                         |                                |                                       | HLC-11159   | TZAIC451-05 | FJ583652 |
|                         |                                |                                       | HLC-11135   | TZAIC427-05 | FJ583653 |
|                         |                                | <i>Melichthys niger</i>               | HLC-11170   | TZAIC462-05 | FJ583654 |
|                         |                                |                                       | HLC-13295   | TZAIB672-06 | FJ583655 |
|                         |                                |                                       | HLC-15217   | TZAIB887-07 | FJ583656 |
|                         |                                |                                       | HLC-11549   | TZAIC481-06 | FJ583657 |
|                         |                                |                                       | HLC-10982   | TZAIC282-05 | FJ583658 |
|                         |                                | <i>Odonus niger</i>                   | HLC-11572   | TZAIC504-06 | FJ583744 |
|                         |                                | <i>Pseudobalistes flavimarginatus</i> | HLC-11114   | TZAIC406-05 | FJ583961 |
|                         |                                | <i>Pseudobalistes fuscus</i>          | HLC-12315   | TZAIB298-06 | FJ583962 |
|                         |                                |                                       | HLC-12033   | TZAIB110-06 | FJ583963 |
|                         |                                | <i>Rhinecanthus aculeatus</i>         | HLC-12206   | TZAIC847-06 | FJ584054 |
|                         |                                |                                       | HLC-TSZ-021 | TZAIC021-05 | FJ584055 |
|                         |                                |                                       | HLC-TSZ-020 | TZAIC020-05 | FJ584056 |
|                         |                                |                                       | HLC-TSZ-019 | TZAIC019-05 | FJ584057 |
|                         |                                |                                       | HLC-TSZ-017 | TZAIC017-05 | FJ584058 |
|                         |                                |                                       | HLC-TSZ-018 | TZAIC018-05 | FJ584059 |
|                         |                                | <i>Rhinecanthus rectangulus</i>       | HLC-15170   | TZAIB852-07 | FJ584060 |
|                         |                                | <i>Rhinecanthus verrucosus</i>        | HLC-10722   | TZAIC022-05 | FJ584061 |
|                         |                                |                                       | HLC-10723   | TZAIC023-05 | FJ584062 |
|                         |                                |                                       | HLC-10724   | TZAIC024-05 | FJ584063 |
|                         |                                |                                       | HLC-10726   | TZAIC026-05 | FJ584064 |
|                         |                                |                                       | HLC-10725   | TZAIC025-05 | FJ584065 |
|                         |                                | <i>Sufflamen bursa</i>                | HLC-12387   | TZAIB370-06 | FJ584128 |
|                         |                                |                                       | HLC-12388   | TZAIB371-06 | FJ584129 |
|                         |                                |                                       | HLC-13047   | TZAIB424-06 | FJ584130 |
|                         |                                | <i>Sufflamen chrysopteron</i>         | HLC-12325   | TZAIB308-06 | FJ584131 |
|                         |                                |                                       | HLC-15184   | TZAIB854-07 | FJ584132 |
|                         |                                | <i>Xanthichthys auromarginatus</i>    | HLC-12268   | TZAIC909-06 | FJ584243 |
|                         |                                |                                       | HLC-11609   | TZAIC541-06 | FJ584244 |
|                         |                                |                                       | HLC-10727   | TZAIC027-05 | FJ584245 |
|                         |                                |                                       | HLC-11608   | TZAIC540-06 | FJ584246 |

|                    |                                     |                                    |             |             |          |
|--------------------|-------------------------------------|------------------------------------|-------------|-------------|----------|
|                    |                                     | HLC-11607                          | TZAIC539-06 | FJ584247    |          |
|                    |                                     | HLC-11606                          | TZAIC538-06 | FJ584248    |          |
|                    |                                     | HLC-13041                          | TZAIB418-06 | FJ584249    |          |
| Family Diodontidae | <i>Xanthichthys lineopunctatus</i>  | HLC-11864                          | TZAIC802-06 | FJ583135    |          |
|                    | <i>Chilomycterus antillarum</i>     | HLC-11863                          | TZAIC801-06 | FJ583136    |          |
|                    |                                     | HLC-11862                          | TZAIC800-06 | FJ583137    |          |
|                    |                                     | HLC-11861                          | TZAIC799-06 | FJ583138    |          |
|                    |                                     | HLC-11860                          | TZAIC798-06 | FJ583139    |          |
|                    |                                     | <i>Diodon holocanthus</i>          | HLC-12023   | TZAIB100-06 | FJ583355 |
|                    |                                     |                                    | HLC-15076   | TZAIB682-06 | FJ583356 |
|                    |                                     |                                    | HLC-15156   | TZAIB838-07 | FJ583357 |
|                    |                                     |                                    | HLC-15164   | TZAIB846-07 | FJ583358 |
|                    |                                     |                                    | HLC-15165   | TZAIB847-07 | FJ583359 |
|                    |                                     |                                    | HLC-11928   | TZAIB193-06 | FJ583360 |
|                    |                                     |                                    | HLC-11929   | TZAIB194-06 | FJ583361 |
|                    |                                     |                                    | HLC-12007   | TZAIB272-06 | FJ583362 |
|                    |                                     |                                    | HLC-12008   | TZAIB273-06 | FJ583363 |
|                    | Family Monacanthidae                | <i>Cantherhines pullus</i>         | HLC-15000   | TZAIB681-06 | FJ583364 |
|                    |                                     |                                    | HLC-15023   | TZAIB762-06 | FJ582914 |
|                    |                                     |                                    | HLC-15024   | TZAIB763-06 | FJ582915 |
|                    |                                     | HLC-15025                          | TZAIB764-06 | FJ582916    |          |
|                    |                                     | HLC-15026                          | TZAIB765-06 | FJ582917    |          |
|                    |                                     | HLC-15027                          | TZAIB766-06 | FJ582918    |          |
|                    |                                     | <i>Oxymonacanthus longirostris</i> | HLC-13235   | TZAIB612-06 | FJ583796 |
|                    |                                     |                                    | HLC-13236   | TZAIB613-06 | FJ583797 |
|                    |                                     |                                    | HLC-13237   | TZAIB614-06 | FJ583798 |
|                    |                                     |                                    | HLC-11036   | TZAIC328-05 | FJ583799 |
|                    |                                     |                                    | HLC-11035   | TZAIC327-05 | FJ583800 |
|                    |                                     | <i>Pervagor aspricaudus</i>        | HLC-13189   | TZAIB566-06 | FJ583843 |
|                    |                                     |                                    | HLC-15186   | TZAIB856-07 | FJ583844 |
|                    |                                     |                                    | HLC-11676   | TZAIC608-06 | FJ583845 |
|                    |                                     | <i>Pervagor melanocephalus</i>     | HLC-15222   | TZAIB892-07 | FJ583846 |
|                    |                                     |                                    | HLC-15223   | TZAIB893-07 | FJ583847 |
|                    |                                     |                                    | HLC-11567   | TZAIC499-06 | FJ583848 |
|                    |                                     |                                    | HLC-11060   | TZAIC352-05 | FJ583849 |
|                    |                                     | <i>Pervagor nigrolineatus</i>      | HLC-13048   | TZAIB425-06 | FJ583850 |
|                    |                                     |                                    | HLC-13049   | TZAIB426-06 | FJ583851 |
| Family Ostraciidae | <i>Acanthostracion quadricornis</i> | HLC-12116                          | TZAIB005-06 | FJ582647    |          |
|                    |                                     | HLC-12117                          | TZAIB006-06 | FJ582648    |          |
|                    |                                     | HLC-12118                          | TZAIB007-06 | FJ582649    |          |
|                    |                                     | HLC-12119                          | TZAIB008-06 | FJ582650    |          |
|                    |                                     |                                    | HLC-12120   | TZAIB009-06 | FJ582651 |
|                    |                                     | <i>Lactophrys bicaudalis</i>       | HLC-12368   | TZAIB351-06 | FJ583605 |
|                    | <i>Lactoria cornuta</i>             | HLC-TSZ-004                        | TZAIC004-05 | FJ583606    |          |
|                    |                                     | HLC-13230                          | TZAIB607-06 | FJ583607    |          |
|                    |                                     | HLC-13231                          | TZAIB608-06 | FJ583608    |          |
|                    |                                     | HLC-13232                          | TZAIB609-06 | FJ583609    |          |
|                    |                                     | HLC-13233                          | TZAIB610-06 | FJ583610    |          |
|                    |                                     | HLC-13234                          | TZAIB611-06 | FJ583611    |          |
|                    |                                     |                                    | HLC-11813   | TZAIC751-06 | FJ583612 |
|                    |                                     |                                    | HLC-11812   | TZAIC750-06 | FJ583613 |
|                    |                                     |                                    | HLC-11811   | TZAIC749-06 | FJ583614 |
|                    |                                     |                                    | HLC-11793   | TZAIC731-06 | FJ583615 |
|                    |                                     |                                    | HLC-11131   | TZAIC423-05 | FJ583616 |
|                    |                                     |                                    | HLC-TSZ-005 | TZAIC005-05 | FJ583617 |
|                    |                                     |                                    | HLC-10984   | TZAIC464-05 | FJ583618 |
|                    |                                     |                                    | HLC-TSZ-008 | TZAIC008-05 | FJ583619 |
|                    |                                     |                                    | HLC-TSZ-007 | TZAIC007-05 | FJ583620 |
|                    |                                     |                                    | HLC-TSZ-006 | TZAIC006-05 | FJ583621 |
|                    |                                     | <i>Ostracion sp.</i>               | HLC-11576   | TZAIC508-06 | FJ583770 |
|                    | <i>Ostracion cubicus</i>            |                                    | HLC-15067   | TZAIB767-06 | FJ583771 |
|                    |                                     |                                    | HLC-15068   | TZAIB768-06 | FJ583772 |
|                    |                                     |                                    | HLC-15069   | TZAIB769-06 | FJ583773 |
|                    |                                     |                                    | HLC-15070   | TZAIB770-06 | FJ583774 |
|                    |                                     |                                    | HLC-15071   | TZAIB771-06 | FJ583775 |
|                    |                                     |                                    | HLC-11575   | TZAIC507-06 | FJ583776 |
|                    |                                     | <i>Ostracion meleagris</i>         | HLC-13149   | TZAIB526-06 | FJ583777 |
|                    |                                     |                                    | HLC-11839   | TZAIC777-06 | FJ583778 |
|                    |                                     |                                    | HLC-12354   | TZAIB337-06 | FJ583779 |
|                    |                                     |                                    | HLC-12355   | TZAIB338-06 | FJ583780 |
|                    |                                     |                                    | HLC-12356   | TZAIB339-06 | FJ583781 |
|                    |                                     |                                    | HLC-12357   | TZAIB340-06 | FJ583782 |
|                    |                                     |                                    | HLC-15161   | TZAIB843-07 | FJ583783 |
|                    |                                     |                                    | HLC-15162   | TZAIB844-07 | FJ583784 |
|                    |                                     |                                    | HLC-15163   | TZAIB845-07 | FJ583785 |
|                    |                                     |                                    | HLC-11730   | TZAIC668-06 | FJ583786 |
|                    |                                     | <i>Ostracion nasus</i>             | HLC-12205   | TZAIB094-06 | FJ583787 |
|                    |                                     | HLC-11858                          | TZAIC796-06 | FJ583788    |          |
|                    |                                     | HLC-12207                          | TZAIC848-06 | FJ583789    |          |

|                               |                       |                                 |           |             |          |
|-------------------------------|-----------------------|---------------------------------|-----------|-------------|----------|
|                               |                       | <i>Ostracion rhinorhynchus</i>  | HLC-11842 | TZAIC780-06 | FJ583790 |
|                               |                       | <i>Tetrosomus gibbosus</i>      | HLC-15110 | TZAIB793-07 | FJ584171 |
|                               | Family Tetraodontidae | <i>Arothron hispidus</i>        | HLC-13172 | TZAIB549-06 | FJ582875 |
|                               |                       | <i>Arothron meleagris</i>       | HLC-13069 | TZAIB446-06 | FJ582876 |
|                               |                       | <i>Arothron nigropunctatus</i>  | HLC-12416 | TZAIB399-06 | FJ582877 |
|                               |                       |                                 | HLC-12415 | TZAIB398-06 | FJ582878 |
|                               |                       |                                 | HLC-11869 | TZAIC807-06 | FJ582879 |
|                               |                       |                                 | HLC-12417 | TZAIB400-06 | FJ582880 |
|                               |                       |                                 | HLC-11814 | TZAIC752-06 | FJ582881 |
|                               |                       |                                 | HLC-11868 | TZAIC806-06 | FJ582882 |
|                               |                       |                                 | HLC-11867 | TZAIC805-06 | FJ582883 |
|                               |                       |                                 | HLC-11866 | TZAIC804-06 | FJ582884 |
|                               |                       |                                 | HLC-11865 | TZAIC803-06 | FJ582885 |
|                               |                       |                                 | HLC-11765 | TZAIC703-06 | FJ582886 |
|                               |                       |                                 | HLC-11130 | TZAIC422-05 | FJ582887 |
|                               |                       |                                 | HLC-11129 | TZAIC421-05 | FJ582888 |
|                               |                       |                                 | HLC-11094 | TZAIC386-05 | FJ582889 |
|                               |                       |                                 | HLC-11095 | TZAIC387-05 | FJ582890 |
|                               |                       | <i>Canthigaster amboinensis</i> | HLC-15204 | TZAIB874-07 | FJ582919 |
|                               |                       | <i>Canthigaster coronata</i>    | HLC-12132 | TZAIB021-06 | FJ582920 |
|                               |                       |                                 | HLC-12133 | TZAIB022-06 | FJ582921 |
|                               |                       | <i>Canthigaster solandri</i>    | HLC-11787 | TZAIC725-06 | FJ582922 |
|                               |                       |                                 | HLC-11021 | TZAIC313-05 | FJ582923 |
|                               |                       |                                 | HLC-11020 | TZAIC312-05 | FJ582924 |
|                               |                       | <i>Canthigaster valentini</i>   | HLC-12124 | TZAIB013-06 | FJ582925 |
|                               |                       |                                 | HLC-11642 | TZAIC574-06 | FJ582926 |
| Superorder Clupeomorpha       |                       |                                 |           |             |          |
| Order Anguilliformes          |                       |                                 |           |             |          |
|                               | Family Muraenidae     | <i>Echidna nebulosa</i>         | HLC-13031 | TZAIB408-06 | FJ583379 |
|                               |                       |                                 | HLC-11769 | TZAIC707-06 | FJ583380 |
|                               |                       | <i>Enchelycore pardalis</i>     | HLC-15183 | TZAIB853-07 | FJ583395 |
|                               |                       | <i>Rhinomuraena quaesita</i>    | HLC-12186 | TZAIB075-06 | FJ584066 |
|                               |                       |                                 | HLC-13109 | TZAIB486-06 | FJ584067 |
|                               |                       |                                 | HLC-13110 | TZAIB487-06 | FJ584068 |
|                               |                       |                                 | HLC-15093 | TZAIB776-07 | FJ584069 |
|                               |                       |                                 | HLC-15094 | TZAIB777-07 | FJ584070 |
| Superorder Ostariophysi       |                       |                                 |           |             |          |
| Order Siluriformes            |                       |                                 |           |             |          |
|                               | Family Plotosidae     | <i>Plotosus lineatus</i>        | HLC-11046 | TZAIC338-05 | FJ583870 |
|                               |                       |                                 | HLC-11047 | TZAIC339-05 | FJ583871 |
|                               |                       |                                 | HLC-11049 | TZAIC341-05 | FJ583872 |
|                               |                       |                                 | HLC-11048 | TZAIC340-05 | FJ583873 |
|                               |                       |                                 | HLC-11050 | TZAIC342-05 | FJ583874 |
| Superorder Paracanthopterygii |                       |                                 |           |             |          |
| Order Batrachoidiformes       |                       |                                 |           |             |          |
|                               | Family Batrachoididae | <i>Opsanus beta</i>             | HLC-10983 | TZAIC463-05 | FJ583769 |
| Order Lophiiformes            |                       |                                 |           |             |          |
|                               | Family Antennariidae  | <i>Antennarius commerson</i>    | HLC-11029 | TZAIC321-05 | FJ582854 |
|                               |                       | <i>Antennarius hispidus</i>     | HLC-15088 | TZAIB690-06 | FJ582855 |
|                               |                       |                                 | HLC-15095 | TZAIB778-07 | FJ582856 |
|                               |                       | <i>Antennarius nummifer</i>     | HLC-13028 | TZAIB405-06 | FJ582857 |
|                               |                       | <i>Antennarius pictus</i>       | HLC-13238 | TZAIB615-06 | FJ582858 |
|                               |                       | <i>Antennarius sp.</i>          | HLC-15028 | TZAIB689-06 | FJ582859 |
|                               |                       | <i>Histrio histrio</i>          | HLC-15035 | TZAIB678-06 | FJ583554 |
|                               |                       |                                 | HLC-15077 | TZAIB679-06 | FJ583555 |
|                               |                       |                                 | HLC-13217 | TZAIB594-06 | FJ583556 |
|                               |                       |                                 | HLC-13218 | TZAIB595-06 | FJ583557 |
|                               | Order Ophidiiformes   |                                 |           |             |          |
|                               | Family Bythitidae     | <i>Brotulina fusca</i>          | HLC-12092 | TZAIB169-06 | FJ582908 |
|                               | Family Ophidiidae     | <i>Lepophidium brevibarbe</i>   | HLC-12197 | TZAIB086-06 | FJ583622 |
|                               |                       |                                 | HLC-12097 | TZAIB174-06 | FJ583623 |
|                               |                       |                                 | HLC-12200 | TZAIB089-06 | FJ583624 |
|                               |                       |                                 | HLC-12198 | TZAIB087-06 | FJ583625 |
|                               |                       |                                 | HLC-12199 | TZAIB088-06 | FJ583626 |
| Class Elasmobranchii          |                       |                                 |           |             |          |
| Superorder Batoidea           |                       |                                 |           |             |          |
| Order Rajiformes              |                       |                                 |           |             |          |
|                               | Family Dasyatidae     | <i>Neotrygon kuhlii</i>         | HLC-12299 | TZAIC940-06 | FJ583339 |
|                               |                       |                                 | HLC-12121 | TZAIB010-06 | FJ583340 |
|                               |                       |                                 | HLC-12298 | TZAIC939-06 | FJ583341 |
|                               |                       | <i>Taeniura lymma</i>           | HLC-12392 | TZAIB375-06 | FJ584168 |
|                               |                       |                                 | HLC-12410 | TZAIB393-06 | FJ584169 |
|                               |                       |                                 | HLC-12409 | TZAIB392-06 | FJ584170 |
|                               | Order Torpediniformes |                                 |           |             |          |
|                               | Family Narcinidae     | <i>Narcine brunnea</i>          | HLC-12282 | TZAIC923-06 | FJ583678 |
| Superorder Selachimorpha      |                       |                                 |           |             |          |
| Order Orectolobiformes        |                       |                                 |           |             |          |
|                               | Family Hemiscylliidae | <i>Chiloscyllium griseum</i>    | HLC-12412 | TZAIB395-06 | FJ583140 |
|                               |                       |                                 | HLC-12411 | TZAIB394-06 | FJ583141 |

*Chiloscyllium punctatum*

|           |             |          |
|-----------|-------------|----------|
| HLC-13259 | TZAIB636-06 | FJ583142 |
| HLC-13181 | TZAIB558-06 | FJ583143 |
| HLC-15206 | TZAIB876-07 | FJ583144 |
